# Supplementary material for: Association of individual and neighbourhood socioeconomic status with physical activity and screen time in seventh-grade boys and girls in Berlin, Germany: a cross-sectional study
Source: PubMed Central journal article supplement — BMJ Open. 2017 Dec 28;7(12):e017974. doi: 10.1136/bmjopen-2017-017974 (PMC5770905; doi:10.1136/bmjopen-2017-017974), 2017-12-28
Supplement: bmjopen-2017-017974.draft_revisions.pdf [file bmjopen-2017-017974.draft_revisions.pdf]

# BMJ Open

BMJ Open is committed to open peer review. As part of this commitment we make the peer review history of every article we publish publicly available.

When an article is published we post the peer reviewers' comments and the authors' responses online. We also post the versions of the paper that were used during peer review. These are the versions that the peer review comments apply to.

The versions of the paper that follow are the versions that were submitted during the peer review process. They are not the versions of record or the final published versions. They should not be cited or distributed as the published version of this manuscript.

BMJ Open is an open access journal and the full, final, typeset and author-corrected version of record of the manuscript is available on our site with no access controls, subscription charges or pay-per-view fees (<http://bmjopen.bmj.com>).

If you have any questions on BMJ Open's open peer review process please email [editorial.bmjopen@bmj.com](mailto:editorial.bmjopen@bmj.com)

# BMJ Open

## Association of individual and neighborhood socioeconomic status on physical activity and sedentary behavior in 7th graders in Berlin, Germany

|                                 |                                                                                                                                                                                                                                                                                                                                                                                                                                                                                                                                                                                                                                                                                                                                                                                                                                                                                                                              |
|---------------------------------|------------------------------------------------------------------------------------------------------------------------------------------------------------------------------------------------------------------------------------------------------------------------------------------------------------------------------------------------------------------------------------------------------------------------------------------------------------------------------------------------------------------------------------------------------------------------------------------------------------------------------------------------------------------------------------------------------------------------------------------------------------------------------------------------------------------------------------------------------------------------------------------------------------------------------|
| Journal:                        | <i>BMJ Open</i>                                                                                                                                                                                                                                                                                                                                                                                                                                                                                                                                                                                                                                                                                                                                                                                                                                                                                                              |
| Manuscript ID                   | bmjopen-2017-017974                                                                                                                                                                                                                                                                                                                                                                                                                                                                                                                                                                                                                                                                                                                                                                                                                                                                                                          |
| Article Type:                   | Research                                                                                                                                                                                                                                                                                                                                                                                                                                                                                                                                                                                                                                                                                                                                                                                                                                                                                                                     |
| Date Submitted by the Author:   | 29-May-2017                                                                                                                                                                                                                                                                                                                                                                                                                                                                                                                                                                                                                                                                                                                                                                                                                                                                                                                  |
| Complete List of Authors:       | Krist, Lilian; Charité University Medical Center, Institute for Social Medicine, Epidemiology and Health Economics<br>Bürger, Christin; Charité-Universitätsmedizin Berlin, Institute for Social Medicine, Epidemiology and Health Economics<br>Ströbele-Benschop, Nanette; , University of Hohenheim, 3 Institute of Nutritional Medicine<br>Roll, Stephanie; Charité Universitätsmedizin, Institute for Social Medicine, Epidemiology and Health Economics<br>Lotz, Fabian; Charité-Universitätsmedizin Berlin, Institute for Social Medicine, Epidemiology and Health Economics<br>Rieckmann, Nina; Charité Universitätsmedizin, Berlin School of Public Health<br>Muller-Nordhorn, Jacqueline; Universitätsmedizin Berlin, Berlin School of Public Health<br>Willich, Stefan; Charité University Medical Center<br>Müller-Riemenschneider, Falk; National University of Singapore, Saw Swee HOck School of Public Health |
| <b>Primary Subject Heading</b>: | Public health                                                                                                                                                                                                                                                                                                                                                                                                                                                                                                                                                                                                                                                                                                                                                                                                                                                                                                                |
| Secondary Subject Heading:      | Epidemiology, Sociology, Sports and exercise medicine                                                                                                                                                                                                                                                                                                                                                                                                                                                                                                                                                                                                                                                                                                                                                                                                                                                                        |
| Keywords:                       | EPIDEMIOLOGY, Community child health < PAEDIATRICS, PREVENTIVE MEDICINE, PUBLIC HEALTH, SPORTS MEDICINE, SOCIAL MEDICINE                                                                                                                                                                                                                                                                                                                                                                                                                                                                                                                                                                                                                                                                                                                                                                                                     |
|                                 |                                                                                                                                                                                                                                                                                                                                                                                                                                                                                                                                                                                                                                                                                                                                                                                                                                                                                                                              |

SCHOLARONE™  
Manuscripts

1  
2  
3 **Association of individual and neighborhood socioeconomic status on physi-**  
4 **cal activity and sedentary behavior in 7<sup>th</sup> graders in Berlin, Germany**  
5  
6

7 *Lilian Krist<sup>1</sup>, Christin Bürger<sup>1</sup>, Nanette Ströbele-Benschop<sup>2</sup>, Stephanie Roll<sup>1</sup>, Fabian Lotz<sup>1</sup>,*  
8 *Nina Rieckmann<sup>2</sup>, Jacqueline Müller-Nordhorn<sup>2</sup>, Stefan N. Willich<sup>1</sup>, Falk Müller-*  
9 *Riemenschneider<sup>1,3</sup>*  
10  
11  
12

- 13 1. *Institute for Social Medicine, Epidemiology and Health Economics, Charité - Universi-*  
14 *tätsmedizin Berlin, Germany*
  - 15 2. *Institute of Nutritional Medicine, University of Hohenheim, Germany*
  - 16 3. *Institute of Public Health, Charité-Universitätsmedizin Berlin, Germany*
  - 17 4. *Saw Swee Hock School of Public Health, National University of Singapore*
- 18  
19  
20  
21  
22  
23  
24  
25  
26

27 **Corresponding author:**

28  
29 Dr. Lilian Krist  
30 Institute for Social Medicine, Epidemiology and Health Economics  
31 Charité - Universitätsmedizin Berlin  
32 Luisenstr. 57  
33 10117 Berlin, Germany  
34 E-Mail: [lilian.krist@charite.de](mailto:lilian.krist@charite.de)  
35 Tel: +49 30 450 529 109  
36  
37  
38  
39

40 **Word count: 2930**

41 **Keywords:** neighborhood socioeconomic status, physical activity, sedentary behavior, adolescents  
42  
43  
44  
45  
46  
47  
48  
49  
50  
51  
52  
53  
54  
55  
56  
57  
58  
59  
60

## ABSTRACT

**Objectives** Few studies have explored the impact of neighborhood socioeconomic status (SES) on health behavior in youths. Our aim was to investigate the association of individual and neighborhood socioeconomic status on physical activity (PA) and sedentary behavior (SB) in 12-13 years old students in Berlin, Germany.

**Design** Cross-sectional study.

**Setting** Secondary schools (high schools and integrated secondary schools) in Berlin, Germany.

**Participants** A total of 2586 students aged 12-13 years (7th grade).

**Main outcome measures** Sociodemographics, anthropometric data and health behavior were assessed by self-report during classes. Primary outcomes were daily leisure time PA and daily sedentary time. Students' characteristics were described with means or percentages. Comparisons were performed with Generalized Linear Mixed Model yielding odds ratios with 95% confidence intervals.

**Results** Mean ( $\pm$ SD) age was 12.5 $\pm$ 0.5 years, 50.5% were girls, 34.1% had a migrant background. 12.8% of the students were at least 60 minutes per day active, 74.1% spent more than two hours per day sitting. Multivariable analysis showed that male sex, lower Body Mass Index (BMI), and attending an integrated secondary school were associated with higher levels of PA, whereas female sex, lower BMI, attending a high school and having a higher individual and neighborhood SES were associated with less time spent in SB.

**Conclusions** Most of the students did not meet recommendations regarding PA and SB. Sex, BMI and school type influenced both, PA and SB. SB was additionally influenced by individual and neighborhood SES. Prevention strategies regarding PA promotion should focus rather on sex or school types than on neighborhood SES.



## Strengths and limitations of the study

- This study provides important new insights into the association of neighborhood socioeconomic status with physical activity and sedentary behavior in school students, independent of the individual socioeconomic status.
- The study sample was very large with students recruited from all 12 districts of Berlin. It comprised a variety of neighborhoods with different levels of socioeconomic status. Also, the amount of students with migration background was representative for the population of Berlin.
- Anthropometric data and physical activity were not assessed objectively but via self-report.
- Sedentary behavior was only assessed as screen time and did not include other behaviors like doing homework, talking on the phone and sitting at school.

## INTRODUCTION

Physical activity has an important impact on health and wellbeing<sup>1</sup>. Low levels of physical activity are associated with higher health risks already among children and adolescents<sup>2</sup> and an increasing number of studies have identified sedentary behavior as an independent risk factor for diseases such as diabetes and obesity in children and adolescents<sup>3</sup>.

The guidelines of the World Health Organisation (WHO) recommend that children and adolescents should spend at least 60 minutes every day in moderate to vigorous activity<sup>4</sup>. The American Academy of Paediatrics (AAP) recommends that school-aged children and youth accumulate no more than 2 hours of recreational screen time each day<sup>5</sup>.

In the last decades however, sedentary behaviour among children and adolescents (watching TV or playing computer games) is increasing while the rates of children being active (playing outside, doing sports) appears to be decreasing over time<sup>6,7</sup>.

In most developed countries, including Germany, a decline in physical activity among children and adolescents can be found with higher age<sup>8</sup>. The percentage of boys and girls in the German Health Interview and Examination Survey for children and adolescents (KiGGS) fulfilling the WHO recommendations for physical activity was 51.5% for the age group 3-6 years (boys 52.2%, girls 50.7%) and 11.5% in the age group 14-17 (boys 15.0%, girls 8.0%). Over half of the girls and nearly three quarters of the boys spent more than two hours per day sitting while using computer, TV or video games<sup>7</sup>.

There is evidence on the association of age and sex on physical activity<sup>9</sup>, whereas studies exploring the influence of socioeconomic status and built and social environment of children show heterogeneous results<sup>10-12</sup>.

A low SES often is associated with a higher BMI and more sedentary time, but not always with low physical activity<sup>13-15</sup>. Studies investigating the social environment of children found evidence of an association with physical activity and diet<sup>16-18</sup>. However, neighborhood socioeconomic status as one aspect of the social environment has not been investigated sufficiently regarding physical activity. Mechanisms through which a lower neighborhood socioeconomic status may influence physical activity and sedentary behavior could be reduced municipal services such as recreational facilities and playgrounds, financial stress or less possibilities to own a gym membership<sup>18</sup>. Studies investigating the

1  
2  
3 influence of neighborhood SES on health independently from the individual SES showed an associa-  
4 tion of disadvantaged neighborhoods with worse health status<sup>19</sup> or a higher risk for cardiovascular  
5 diseases<sup>20</sup>.  
6  
7

8  
9 The results of existing studies regarding physical activity and sedentary behavior are heterogeneous  
10 reporting no association at all, only for special groups or only under certain circumstances<sup>21-23</sup>.  
11  
12

13 Our aim was therefore to investigate the influence of neighborhood socioeconomic status on physical  
14 activity and sedentary behavior in a population based sample of 12 to 13 year old secondary school  
15 students in Berlin, Germany.  
16  
17  
18  
19

## 20 21 **METHODS**

### 22 23 **Study design and setting**

24  
25 The present cross-sectional analysis is part of the BEST-prevention study, a three armed cluster ran-  
26 domized controlled trial that was conducted from 2010 to 2014 with the aim to evaluate a parent in-  
27 volving smoking prevention program for 7th grade students in Berlin<sup>24</sup>. Here, we report cross-sectional  
28 data regarding physical activity and sedentary behavior among the students at baseline.  
29  
30  
31  
32  
33  
34  
35

### 36 37 **Participants and Recruitment**

38  
39 Details of the recruitment are described elsewhere<sup>25</sup>. Briefly, prior to recruitment, permission of the  
40 Berlin senate of education, youth and research (Senatsverwaltung für Bildung, Jugend und Wissen-  
41 schaft) was obtained, and school principals and contact teachers from all 12 districts of Berlin were  
42 informed about the project. Students were eligible for the study if they: i) were in the 7th grade, ii)  
43 attended one of the participating schools, and iii) showed intellectual and physical ability to make an  
44 informed decision about study participation. Separate signed written informed consent was required  
45 from participating students as well as from at least one parent/caregiver. The study was approved by  
46  
47  
48  
49  
50  
51  
52  
53  
54  
55  
56  
57  
58  
59  
60 the ethical review committee of the Charité-Universitätsmedizin Berlin, Germany.

## Measurements

The study questionnaire is based on existing and validated questionnaires investigating adolescent health behavior (e.g. Health Behavior in School Aged Children, HBSC<sup>26</sup>; German Children and Youths Survey, KIGGS<sup>27</sup>). It includes questions related to socio-demographics, smoking and other health behaviors, such as alcohol consumption, nutrition, physical activity and sedentary behaviors, as well as height and weight. Our study group has the status of an associated project of the HBSC.

During a first visit, the BEST study was presented and consent forms were distributed to the students by trained research personnel, during the second visit, baseline data were assessed with the questionnaire in an entire class.

## Outcome measures

### Physical activity

Physical activity (PA) was assessed using three adapted items of the HBSC questionnaire. The first question was assessed by asking: 'On how many days in the past week were you physically active for at least 60 minutes?' According to the WHO guidelines, for our primary outcome we defined a student as meeting current guidelines if he or she was active at least 60 minutes on each of the last seven days (yes/no)<sup>4</sup>. The other questions asked for the number of days and hours of physical activity per week.

### Sedentary behavior

Sedentary behavior (SB) was assessed with two questions asking for the screen time of the students per day (week day and weekend day were asked separately). According to the AAP<sup>5</sup> recommendations we defined more than 2 hours screen time per day as high sedentary behavior.

## Covariates

### Individual level

Sex, age and anthropometric data (height and weight) of the students were assessed via self-report. The BMI was calculated using the self-reported data. Subgroups were chosen using the quasi-centile curves (constructed to pass through a defined BMI at a given age) suggested by Cole et. al<sup>28,29</sup>. We

1  
2  
3 used the age of 18 years as reference since the BMI definition is valid from that age. According to that,  
4  
5 underweight was defined as a BMI at the age of 18 of under 18.5 kg/m<sup>2</sup>, normal weight as a BMI be-  
6  
7 tween 18.5 and 24.9 kg/m<sup>2</sup>, overweight as a BMI between 25 and 29.9 kg/m<sup>2</sup>, and obesity as a BMI of  
8  
9 over 30 kg/m<sup>2</sup>.

#### 10 11 12 Migration background

13  
14 A student was defined as having a migration background if he or she was not born in Germany or if at  
15  
16 least one parent was not born in Germany but moved to Germany after 1949<sup>30</sup>.

#### 17 18 19 Individual socioeconomic status

20  
21 To assess the individual socioeconomic status (SES) of the student, we used the family affluence scale  
22  
23 (FAS), a validated instrument to assess the material affluence of the family asking for the number of  
24  
25 cars and computers in the family, for holidays during the past 12 months, and whether the child has its  
26  
27 own room<sup>31</sup>. The FAS consists of values from zero to seven, with higher values indicating higher af-  
28  
29 fluence, and can be categorized into three categories (low, moderate, and high affluence). The FAS  
30  
31 was completely assessed only at the 24 months follow-up, we therefore used the 24 months follow-up  
32  
33 FAS to describe family SES at baseline.

#### 34 35 36 Neighborhood socioeconomic status

37  
38 For the SES of the students' neighborhood, we used the social index defined and implemented by the  
39  
40 'Atlas of Social Structure' (Sozialstrukturatlas), an instrument used in Berlin to describe the social situ-  
41  
42 ation of Berlin by classifying postal code regions accordingly<sup>32,33</sup>. This social index reflects the distri-  
43  
44 bution of social and health burden in Berlin. Social and health indicators are e.g. unemployment, wel-  
45  
46 fare reception rate, average per capita income and also premature mortality and avoidable deaths. The  
47  
48 index ranges from 1 reflecting the best to 7 reflecting the worst social situation of a district.

#### 49 50 51 School types

52  
53 In Berlin, two types of schools exist: high schools with the possibility to achieve a high-school diplo-  
54  
55 ma after 12 years, as well as integrated secondary schools (an integration of different school types)  
56  
57 with the possibility to achieve a high-school diploma after 13 years. More often than high schools,  
58  
59  
60

1  
2  
3 integrated secondary schools are left by the students after the 10th grade with a secondary school leav-  
4 ing certificate. The academic requirements are higher in high schools than in integrated secondary  
5 schools<sup>34</sup>.  
6  
7

#### 8 9 Schools' neighborhood socioeconomic status

10 Analogous to the individual neighborhood social index, we assessed the social index of the schools'  
11 neighborhood.  
12  
13  
14

### 15 16 17 18 **Statistical analysis**

19 All statistical analyses were performed for the 12 and 13 years old students only due to the small num-  
20 ber of students in the other age groups (2.6, 5.1, 0.3 and 0.1% in the age groups 11, 14, 15 and 16  
21 years, respectively). We used all data available for the respective analysis; missing data were not im-  
22 puted.  
23  
24  
25  
26  
27

28 Variables were analysed by descriptive statistical methods (e.g. mean and standard deviation (SD),  
29 frequencies and percentages).  
30  
31

32 Because of the nested structure of the data with both fixed and random effects, a generalized linear  
33 mixed model (GLMM) was used for the analysis when comparing groups. In general, the random fac-  
34 tors 'school' and 'class within school' (as nested factor) were included into the models. For binary  
35 outcomes a logit link function was used, for continuous outcomes an identity link function was used  
36 (distribution family 'normal'). Results of logistic models are presented as odds ratios (OR) and 95%-  
37 confidence intervals (CI), results of linear models as Least-Square Means and 95%- CI.  
38  
39  
40  
41  
42  
43  
44

45 The same framework was used to determine the association of factors within a set of many factors in  
46 multivariable analyses. Here, we included sex, socioeconomic status (FAS-score), and migration  
47 background as categorical variables and BMI as continuous variable in our first model to investigate  
48 individual influencing factors. In addition we included the respective outcome as covariate (sedentary  
49 behavior as covariate for physical activity and vice versa). Afterwards we added in three steps the  
50 environmental factors 'student's neighborhood SES', 'school type' and 'schools' neighborhood SES'.  
51  
52  
53  
54  
55  
56  
57  
58  
59  
60

1  
2  
3  
4  
5  
6  
7  
8  
9  
10  
11  
12  
13  
14  
15  
16  
17  
18  
19  
20  
21  
22  
23  
24  
25  
26  
27  
28  
29  
30  
31  
32  
33  
34  
35  
36  
37  
38  
39  
40  
41  
42  
43  
44  
45  
46  
47  
48  
49  
50  
51  
52  
53  
54  
55  
56  
57  
58  
59  
60

Nominal p-values are reported and are considered exploratory. Analyses were performed using the software package SAS release 9.3 and 9.4 (SAS Institute Inc., Cary, NC, USA).

For peer review only

## RESULTS

### Baseline characteristics of the study population

We included 2586 students aged 12 and 13 years in our analysis. Figure 1 shows the recruitment process of the schools, classes and students.

Sociodemographic baseline characteristics of all participating students are presented in Table 1a, the characteristics of the schools are presented in Table 1b. The mean ( $\pm$ SD) age of participants was 12.5  $\pm$  0.5 years and the distribution between girls and boys was similar (50.5% vs. 49.5%). Of the entire sample, 34.1% were defined as having a migrant background.



Table 1a: Baseline Characteristics of Students

| Individual level                                                      | Boys                   | Girls           | Total           | p-value |
|-----------------------------------------------------------------------|------------------------|-----------------|-----------------|---------|
|                                                                       | Mean $\pm$ SD or n (%) |                 |                 |         |
| Number of students, n (%)                                             | 1279 (49.5)            | 1307 (50.5)     | 2586            |         |
| Age (years, mean $\pm$ SD) (n=2586)                                   | 12.5 $\pm$ 0.5         | 12.4 $\pm$ 0.5  | 12.4 $\pm$ 0.5  | <0.001  |
| 12 years, n (%)                                                       | 651 (50.9)             | 775 (59.3)      | 1426 (55.1)     | <0.001  |
| 13 years, n (%)                                                       | 628 (49.1)             | 532 (40.7)      | 1160 (44.9)     |         |
| Height (cm, mean $\pm$ SD) (n=2440)                                   | 161.1 $\pm$ 9.5        | 160.1 $\pm$ 7.3 | 160.6 $\pm$ 8.4 | 0.003   |
| Weight (kg, mean $\pm$ SD) (n=2360)                                   | 49.5 $\pm$ 10.9        | 47.0 $\pm$ 8.9  | 48.3 $\pm$ 10.0 | <0.001  |
| BMI* (kg/m <sup>2</sup> , mean $\pm$ SD) (n=2296)                     | 18.9 $\pm$ 3.1         | 18.3 $\pm$ 2.7  | 18.6 $\pm$ 2.9  | <0.001  |
| BMI range                                                             | 11.8 – 30.9            | 11.7 – 33.8     | 11.7 – 33.8     |         |
| Underweight (BMI <10 <sup>th</sup> percentile)**                      | 126 (11.1)             | 218 (18.8)      | 344 (15.0)      | <0.001  |
| Normal weight (BMI 10 <sup>th</sup> - <90 <sup>th</sup> percentile)** | 822 (72.2)             | 843 (72.6)      | 1665 (72.4)     |         |
| Overweight (BMI 90 <sup>th</sup> - <97 <sup>th</sup> percentile)**    | 166 (14.6)             | 90 (7.8)        | 256 (11.1)      |         |
| Obesity (BMI $\geq$ 97 <sup>th</sup> percentile)**                    | 24 (2.1)               | 10 (0.9)        | 34 (1.5)        |         |
| Migrant background (n=2423)                                           | 396 (33.1)             | 429 (35.0)      | 825 (34.0)      | 0.307   |
| Socioeconomic status (family affluence scale) (n=2139)                |                        |                 |                 |         |
| 6-7 (high SES***)                                                     | 569 (53.7)             | 500 (46.3)      | 1069 (50.0)     | 0.003   |
| 4-5 (moderate SES***)                                                 | 371 (35.0)             | 441 (40.9)      | 812 (38.0)      |         |
| 0-3 (low SES***)                                                      | 120 (11.3)             | 138 (12.8)      | 258 (12.1)      |         |
| Student's neighborhood SES (n=2240)                                   | 1114                   | 1126            | 2240            |         |
| Mean $\pm$ SD                                                         | 4.0 $\pm$ 1.9          | 4.1 $\pm$ 1.9   | 4.0 $\pm$ 1.9   | 0.526   |
| 1                                                                     | 127 (11.4)             | 123 (10.9)      | 250 (11.2)      |         |
| 2                                                                     | 182 (16.3)             | 194 (17.2)      | 376 (16.8)      |         |
| 3                                                                     | 143 (12.8)             | 119 (10.6)      | 262 (11.7)      |         |
| 4                                                                     | 215 (19.3)             | 229 (20.3)      | 444 (19.8)      |         |
| 5                                                                     | 162 (14.5)             | 160 (14.2)      | 322 (14.4)      |         |
| 6                                                                     | 134 (12.0)             | 134 (11.9)      | 268 (12.0)      |         |
| 7                                                                     | 151 (13.6)             | 167 (14.8)      | 318 (14.2)      |         |
| School type (n=2586)                                                  |                        |                 |                 |         |
| High School <sup>a</sup> students (15 schools)                        | 507 (39.6)             | 624 (47.7)      | 1131 (43.7)     | <0.001  |
| Integrated Secondary School <sup>b</sup> students (32 schools)        | 772 (60.4)             | 683 (52.3)      | 1455 (56.3)     |         |

\*Body Mass Index (kg/m<sup>2</sup>)\*\* BMI percentiles according to Cole et al. <sup>35,36</sup>

\*\*\* Socioeconomic Status

<sup>a</sup> High schools (5<sup>th</sup> or 7<sup>th</sup> grade to 12<sup>th</sup> grade, graduation with high school diploma after 12<sup>th</sup> grade)<sup>b</sup> Integrated secondary schools (integration of different school types, 7<sup>th</sup> grade to 13<sup>th</sup> grade, graduation with secondary school leaving certificate after 10<sup>th</sup> grade or high school diploma after 13<sup>th</sup> grade)

**Table 1b: Baseline characteristics of schools**

| School level                                  | High Schools <sup>a</sup> | Integrated Secondary Schools <sup>b</sup> | Total     |        |
|-----------------------------------------------|---------------------------|-------------------------------------------|-----------|--------|
| Schools' neighborhood SES*, Mean±SD           | 3.5±1.4                   | 3.2±1.6                                   | 4.0±1.8   | <0.001 |
| n (%)                                         |                           |                                           |           |        |
| 1                                             | 1 (6.7)                   | 3 (9.4)                                   | 4 (8.5)   |        |
| 2                                             | 4 (26.7)                  | 3 (9.4)                                   | 7 (14.9)  |        |
| 3                                             | 2 (13.3)                  | 4 (12.5)                                  | 6 (12.8)  |        |
| 4                                             | 4 (26.7)                  | 7 (21.9)                                  | 11 (23.4) |        |
| 5                                             | 2 (13.3)                  | 4 (12.5)                                  | 6 (12.8)  |        |
| 6                                             | 2 (13.3)                  | 5 (15.6)                                  | 6 (12.8)  |        |
| 7                                             | 0 (0.0)                   | 6 (18.8)                                  | 6 (12.8)  |        |
| Student's neighborhood SES*, Mean±SD (n=2240) | 3.1±1.6                   | 4.6±1.9                                   |           | <0.001 |
| SES* (family affluence scale) (n=2139)        |                           |                                           |           |        |
| 6-7 (high SES*)                               | 65.8%                     | 36.5%                                     |           | <0.001 |
| 4-5 (moderate SES*)                           | 29.9%                     | 44.8%                                     |           |        |
| 0-3 (low SES*)                                | 4.3%                      | 18.7%                                     |           |        |

\* Socioeconomic Status

<sup>a</sup>High schools (5<sup>th</sup> or 7<sup>th</sup> grade to 12<sup>th</sup> grade, graduation with high school diploma after 12<sup>th</sup> grade)

<sup>b</sup>Integrated secondary schools (integration of different school types, 7<sup>th</sup> grade to 13<sup>th</sup> grade, graduation with secondary school leaving certificate after 10<sup>th</sup> grade or high school diploma after 13<sup>th</sup> grade)

## Physical activity and sedentary behavior

Of the total sample, 12.8% fulfilled the WHO criteria being active for at least 60 minutes per day. The proportion of boys fulfilling the criteria was higher than in girls (15.9% of the boys vs. 9.8% of the girls, OR 1.7 [1.4;2.2];  $p < 0.001$ ) and boys were more active outside school than girls ( $0.9 \pm 0.8$  versus  $0.6 \pm 0.6$  hours per day, mean difference 0.3 hours [0.2;0.3],  $p < 0.001$ ), Table 2. More than 80% of the boys and almost two thirds of the girls reported sitting for more than 2 hours per day (outside of school), OR 2.2 [1.8;2.6];  $p < 0.001$ . Sedentary behavior on weekend days was higher than on week days among all students ( $5.7 \pm 3.6$  versus  $3.5 \pm 2.7$ ).

**Table 2. Comparison of boys and girls aged 12-13 years**

|                                                                    | Boys                  | Girls                 |                        | p-value<br>(boys<br>vs. girls) | Total         |
|--------------------------------------------------------------------|-----------------------|-----------------------|------------------------|--------------------------------|---------------|
|                                                                    | Proportion            | Proportion            | Odds ratio [95%<br>CI] |                                | Proportion    |
| WHO recommendations fulfilled: 60min/day<br>every day per week (%) | 15.9                  | 9.8                   | 1.7 (1.4;2.2)          | <0.001                         | 12.8          |
| Sitting 2 hours or more per day (%)<br>(hours $\pm$ SD per week)   | Mean $\pm$ SD<br>81.5 | Mean $\pm$ SD<br>66.9 | 2.2 (1.8;2.6)          | <0.001                         | 74.1          |
| Leisure time physical activity per day<br>(hours $\pm$ SD)         | 0.9 $\pm$ 0.8         | 0.6 $\pm$ 0.6         | 0.3 (0.2;0.3)          | <0.001                         | 0.8 $\pm$ 0.7 |
| Sedentary behavior TV (hours $\pm$ SD)                             |                       |                       |                        |                                |               |
| school day                                                         | 2.2 $\pm$ 1.8         | 1.9 $\pm$ 1.6         | 0.3 (0.2;0.4)          | <0.001                         | 2.0 $\pm$ 1.7 |
| weekend day                                                        | 3.4 $\pm$ 2.0         | 2.9 $\pm$ 2.0         | 0.4 (0.3;0.6)          | <0.001                         | 3.1 $\pm$ 2.0 |
| Sedentary behavior Computer (hours $\pm$ SD)                       |                       |                       |                        |                                |               |
| school day                                                         | 1.8 $\pm$ 1.8         | 1.3 $\pm$ 1.6         | 0.5 (0.4;0.7)          | <0.001                         | 1.5 $\pm$ 1.7 |
| weekend day                                                        | 3.1 $\pm$ 2.2         | 2.0 $\pm$ 2.0         | 1.1 (1.0;1.3)          | <0.001                         | 2.6 $\pm$ 2.2 |
| Overall sedentary behavior (hours $\pm$ SD)                        |                       |                       |                        |                                |               |
| school day                                                         | 3.9 $\pm$ 2.7         | 3.1 $\pm$ 2.5         | 0.8 (0.6;0.97)         | <0.001                         | 3.5 $\pm$ 2.7 |
| weekend day                                                        | 6.5 $\pm$ 3.6         | 4.9 $\pm$ 3.4         | 1.6 (1.3;1.8)          | <0.001                         | 5.7 $\pm$ 3.6 |

## Multivariable analysis

In model 1 of the multivariable analysis we included the individual variables sex, BMI, socioeconomic status and migration background. Sex and BMI were statistically significantly associated with both outcomes, physical activity and sedentary behavior (Figure 2 and 3; suppl. table 1 and 2). Boys had higher odds to be active but at the same time they were also more likely to sit compared to girls. Higher BMI was associated with less activity and more sedentary time. A higher socioeconomic status and having no migration background were associated with less sedentary time but were not associated with physical activity. We saw no association of sedentary behavior on physical activity (and vice versa). There was no interaction effect between gender and sedentary behavior regarding physical activity, nor between gender and physical activity regarding sedentary behavior (data not shown).

Subsequently, the students' neighborhood SES (model 2a), school type (model 2b) and schools' neighborhood SES (model 2c) were separately included in three different models. Students' neighborhood SES was not associated with physical activity, but students with a lower neighborhood SES were more likely to sit more than two hours per day than students with a higher neighborhood SES. Students of the integrated secondary schools were more active but reported also more sedentary time than high school students. Schools' neighborhood SES had no effect on physical activity nor on sedentary behavior.

After including all covariates for model 3, physical activity was influenced by sex, BMI, and school type, while sedentary behavior was additionally influenced by the individual and the neighborhood socioeconomic status of the student. In summary: boys, students with a low BMI, and secondary school students, were more likely to meet WHO recommendations regarding 60 minutes of physical activity per day, and boys, students with a high BMI, secondary school students, and students with a low individual or neighborhood socioeconomic status were more likely to exceed the 2 hours of sedentary time per day. To exclude eventual associations between school type and other outcomes we calculated one model without the covariate school type which did not change the results (data not shown).

## DISCUSSION

In our study sample, fewer than 20% of boys and 10% of the girls fulfilled the WHO recommendations for physical activity. These results are in line with the most recent results of the KiGGS Study (KiGGS wave 1) and the German subsample of the HBSC study<sup>7,37</sup>.

More than 80% of the boys and 2/3 of the girls spent more than 2 hours per day sitting (in addition to sitting time at school), which is exceeding international screen viewing recommendations<sup>5</sup>. In many other countries, the numbers of children and adolescents engaging in more than 2 hours of screen time per day are comparable with German youths<sup>8</sup>. The ENERGY project (participating countries were Belgium, Greece, Hungary, the Netherlands and Switzerland) showed that girls aged 10-12 years spent more time sitting than boys<sup>38</sup>.

Students of integrated secondary schools spent more time sitting, but were more active than high school students. This is in contrast to a study from Germany, where high school students were more likely to achieve a healthier lifestyle including regular physical activity than students from other school types<sup>14</sup>. The neighborhood SES as well as the SES of the students was correlated with the school type which is a common fact in Germany<sup>39</sup>. However, school type remained an independent influencing factor regarding physical activity, while neither individual nor neighborhood SES were associated.

The SES of the students in our study sample was only significantly associated with sedentary behavior, but not with physical activity. The HBSC data for Germany also did not show any influence of the SES on physical activity, but a positive correlation between lower SES and higher sedentary time was found<sup>37</sup>. However, the influence of family affluence is very heterogeneous across different countries. In Eastern countries for instance, watching TV is associated with higher affluence, whereas in Western and Northern countries, the opposite is the case<sup>8</sup>.

In contrast to the study of Lampert et al., students' migration background had no influence on physical activity in our study<sup>40</sup>.

A new aspect of our study was the investigation of the neighborhood SES as influencing factor of physical activity and sedentary behavior. Similar to the individual SES, an association was only found for sedentary behavior, while physical activity was not affected.

1  
2  
3 There is one study using the social index of Berlin, too, showing an association of a lower neighbor-  
4 hood SES with a higher BMI in 5-6 years old children living in Berlin. The authors did not include,  
5 however, health behaviors like physical activity or sedentary time in their analyses<sup>41</sup>.  
6  
7

8  
9 Another study used unemployment rate and overcrowding as indicators of neighborhood SES. The  
10 authors found a correlation between the unemployment rate and low physical activity in different ur-  
11 ban districts in Germany and the Czech republic defining low physical activity as being active less  
12 than once a week which is a very broad definition<sup>21</sup>.  
13  
14

15  
16 A study from Switzerland reported different settings while engaging in physical activity and sedentary  
17 behavior among children of low and high neighborhood SES, whereas the overall time spent active or  
18 sedentary did not differ essentially between the two groups<sup>22</sup>.  
19  
20

21  
22 Apparently, physical activity is hardly influenced by neighborhood SES, whereas sedentary behavior  
23 is more likely to be affected. Up to now, the measurement of neighborhood SES is very heterogene-  
24 ous. To further investigate this topic, a more detailed definition of neighborhood SES should be im-  
25 plemented for European countries. Further research should focus on this to achieve a better compara-  
26 bility of study results among different countries and to facilitate the investigation of its associations.  
27  
28  
29  
30  
31  
32

### 33 **Strengths and limitations**

34  
35 Size and representativity of our sample including migration background, socioeconomic status and  
36 gender distribution are important strenghts of our study<sup>42</sup>. However, the results are only valid for re-  
37 gions with similar characteristics as Berlin: an urban region with high walkability and good infrastruc-  
38 ture for transportation and cycling.  
39  
40  
41  
42

43  
44 Some limitations have to be considered as well. Anthropometric data and physical activity were not  
45 measured objectively. Self-report sometimes leads to distorted results through misreporting<sup>43</sup>. Howev-  
46 er, children and adolescents seem to be as reliable in providing accurate information as adults<sup>44</sup>. An-  
47 other limitation is that we assessed sedentary behavior only as screen time and did not include other  
48 behaviors like doing homework, talking on the phone or others.  
49  
50  
51  
52  
53  
54  
55  
56  
57  
58  
59  
60

## CONCLUSION

In our study sample, the majority of the students did not meet the WHO recommendations regarding physical activity and sedentary time. Sex, BMI and school type influenced both, physical activity and sedentary behavior. Sedentary behaviour was additionally influenced by individual and neighborhood SES. Future prevention strategies regarding physical activity promotion should focus rather on different approaches for boys and girls or schooltypes than on the neighborhood SES.

## ACKNOWLEDGEMENTS

The authors thank the Berlin City Council (Senatsverwaltung für Bildung, Jugend und Wissenschaft, Berlin) and the participating schools, teachers and students for supporting the project.

## CONTRIBUTORS

LK drafted the manuscript with intellectual input from SR, NR, JMN, NSB and FMR, carried out the data collection and parts of the data analysis. FL and SR were responsible for data assessment and statistical analyses, CB, NR, JMN and NSB were responsible for the design of the recruitment methods and the assessment tools, SW and FMR participated in the conception of the study. All authors read and approved the final manuscript.

## FUNDING

This work was supported by ‘The German Cancer Aid (Deutsche Krebshilfe e.V.)’.

## COMPETING INTERESTS

None declared.

## ETHICS APPROVAL

The study was approved by the ethical review committee of the Charité-Universitätsmedizin Berlin, Germany.

## DATA SHARING STATEMENT

No additional data available.

## REFERENCES

1. WHO. *Global Health Risks.*; 2009.
2. Ferreira de Moraes AC, Carvalho HB, Siani A, et al. Incidence of high blood pressure in children - Effects of physical activity and sedentary behaviors: The IDEFICS study: High blood pressure, lifestyle and children. *Int J Cardiol.* 2014;180C:165-170.
3. Danielsen YS, Júlíusson PB, Nordhus IH, et al. The relationship between life-style and cardio-metabolic risk indicators in children: the importance of screen time. *Acta Paediatr.* 2011;100(2):253-259.
4. WHO. *Global Recommendations on Physical Activity for Health.*; 2010:60.
5. American Academy of Pediatrics. Children, Adolescents, and Television. *Pediatrics.* 2001;107(2):423-426.
6. Santaliestra-Pasías AM, Mouratidou T, Verbestel V, et al. Physical activity and sedentary behaviour in European children: the IDEFICS study. *Public Health Nutr.* 2013;(4):1-12.
7. Manz K, Schlack R, Poethko-Müller C, Mensink G, Finger J, Lampert T. Physical activity and electronic media use in children and adolescents: results of the KiGGS study: first follow-up (KiGGS wave 1). *Bundesgesundheitsblatt Gesundheitsforschung Gesundheitsschutz.* 2014;57(7):840-848.
8. Currie C, Gabhainn A, Godeau E, et al. *Health Policy for Children and Adolescents, No. 5 - Inequalities in Young People's Health.*; 2006.
9. Gorely T, Marshall SJ, Biddle SJH, Cameron N. Patterns of sedentary behaviour and physical activity among adolescents in the United Kingdom: Project STIL. *J Behav Med.* 2007;30(6):521-531.
10. Bringolf-Isler B, Mäder U, Dössegger A, et al. Regional differences of physical activity and sedentary behaviour in Swiss children are not explained by socio-demographics or the built environment. *Int J Public Health.* 2015;60(3):291-300.
11. Gorely T, Atkin AJ, Biddle SJ, Marshall SJ. Family circumstance, sedentary behaviour and physical activity in adolescents living in England: Project STIL. *Int J Behav Nutr Phys Act.* 2009;6:33.



- 1  
2  
3  
4  
5  
6  
7  
8  
9  
10  
11  
12  
13  
14  
15  
16  
17  
18  
19  
20  
21  
22  
23  
24  
25  
26  
27  
28  
29  
30  
31  
32  
33  
34  
35  
36  
37  
38  
39  
40  
41  
42  
43  
44  
45  
46  
47  
48  
49  
50  
51  
52  
53  
54  
55  
56  
57  
58  
59  
60
12. Stone MR, Faulkner GE, Mitra R, Buliung RN. The freedom to explore: examining the influence of independent mobility on weekday, weekend and after-school physical activity behaviour in children living in urban and inner-suburban neighbourhoods of varying socioeconomic status. *Int J Behav Nutr Phys Act.* 2014;11:5.
  13. Kurth B-M, Schaffrath Rosario A. The prevalence of overweight and obese children and adolescents living in Germany. Results of the German Health Interview and Examination Survey for Children and Adolescents (KiGGS). *Bundesgesundheitsblatt Gesundheitsforschung Gesundheitsschutz.* 2007;50:736-743.
  14. Kuntz B, Lampert T. How healthy is the lifestyle of adolescents in Germany? *Gesundheitswesen.* 2013;75:67-76.
  15. Gose M, Plachta-Danielzik S, Willié B, Johannsen M, Landsberg B, Müller MJ. Longitudinal influences of neighbourhood built and social environment on children's weight status. *Int J Environ Res Public Health.* 2013;10(10):5083-5096.
  16. Suglia SF, Shelton RC, Hsiao A, Wang YC, Rundle A, Link BG. Why the Neighborhood Social Environment Is Critical in Obesity Prevention. *J Urban Heal.* 2016;93(1):206-212.
  17. Mitchell CA, Clark AF, Gilliland JA. Built Environment Influences of Children's Physical Activity: Examining Differences by Neighbourhood Size and Sex. *Int J Environ Res Public Health.* 2016;13(1).
  18. McNeill LH, Kreuter MW, Subramanian S V. Social Environment and Physical activity: A review of concepts and evidence. *Soc Sci Med.* 2006;63(4):1011-1022.
  19. Ross CE, Mirowsky J. Neighborhood Disadvantage, Disorder, and Health. *J Health Soc Behav.* 2001;42(3):258-276.
  20. Cubbin C, Hadden WC, Winkleby MA. Neighborhood Context and Cardiovascular Disease Risk Factors: The Contribution of Material Deprivation. *Ethnicity&Disease.* 2001;11:687-700.
  21. Dragano N, Bobak M, Wege N, et al. Neighbourhood socioeconomic status and cardiovascular risk factors: a multilevel analysis of nine cities in the Czech Republic and Germany. *BMC Public Health.* 2007;7:255.
  22. Bürgi R, Tomatis L, Murer K, de Bruin ED. Spatial physical activity patterns among primary

- 1  
2  
3 school children living in neighbourhoods of varying socioeconomic status: a cross-sectional  
4 study using accelerometry and Global Positioning System. *BMC Public Health*.  
5  
6 2016;16(1):282.  
7  
8  
9 23. Kavanagh AM, Goller JL, King T, Jolley D, Crawford D, Turrell G. Urban area disadvantage  
10 and physical activity: a multilevel study in Melbourne, Australia. *J Epidemiol Community*  
11 *Health*. 2005;59(11):934-940.  
12  
13 24. Krist L, Lotz F, Bürger C, et al. Long-term effectiveness of a combined student-parent and a  
14 student-only smoking prevention intervention among 7th grade school children in Berlin,  
15 Germany. *Addiction*. 2016;111(12):2219-2229.  
16  
17 25. Müller-Riemenschneider F, Krist L, Bürger C, et al. Berlin evaluates school tobacco prevention  
18 - BEST prevention: study design and methodology. *BMC Public Health*. 2014;14(1):871.  
19  
20 26. Ottova V, Hillebrandt D, Kolip P, et al. The HBSC Study in Germany – Study Design and  
21 Methodology. *Gesundheitswesen*. 2012;74(Suppl 1):S8-14.  
22  
23 27. Opper E, Worth A, Wagner M, Bös K. The module „Motorik“ in the German Health Interview  
24 and Examination Survey for Children and Adolescents (KiGGS). Motor Fitness and physical  
25 activity of children and young people. *Bundesgesundheitsblatt Gesundheitsforschung*  
26 *Gesundheitsschutz*. 2007;50:879-888.  
27  
28 28. Cole TJ, Flegal KM, Nicholls D, Jackson A a. Body mass index cut offs to define thinness in  
29 children and adolescents: international survey. *BMJ*. 2007;335(7612):194.  
30  
31 29. Cole TJ, Bellizzi MC, Flegal KM, Dietz WH. Establishing a standard definition for child  
32 overweight and obesity worldwide: international survey. *BMJ*. 2000;320:1240.  
33  
34 30. Bundesministerium der Justiz. *Verordnung Zur Erhebung Der Merkmale Des*  
35 *Migrationshintergrundes (Migrationshintergrund- Erhebungsverordnung - MighEV)*.; 2010.  
36  
37 31. Currie CE, Elton RA, Todd J, Platt S. Indicators of socioeconomic status for adolescents : the  
38 WHO Health Behaviour in School-aged Children Survey. *Health Educ Res*. 1997;12(3):385-  
39 397.  
40  
41 32. Senatsverwaltung für Gesundheit und Soziales. *Handlungsorientierter Sozialstrukturatlas*  
42 *Berlin 2013.*; 2013.  
43  
44  
45  
46  
47  
48  
49  
50  
51  
52  
53  
54  
55  
56  
57  
58  
59  
60

- 1  
2  
3 33. Senatsverwaltung für Gesundheit Umwelt und Verbraucherschutz.  
4  
5 *Gesundheitsberichterstattung Berlin - Spezialbericht Sozialstrukturatlas Berlin 2008.*; 2008.  
6  
7 34. Institut für Schulqualität der Länder Berlin und Brandenburg. *Bildung in Berlin Und*  
8  
9 *Brandenburg 2010.*; 2010.  
10  
11 35. Cole TJ, Bellizzi MC, Flegal KM, Dietz WH. Establishing a standard definition for child  
12  
13 overweight and obesity worldwide: international survey. *BMJ*. 2000;320(1240):1-6.  
14  
15 36. Cole TJ, Flegal KM, Nicholls D, Jackson AA. Body mass index cut offs to define thinness in  
16  
17 children and adolescents : international survey. *BMJ*. 2007;335(7612):194.  
18  
19 37. Bucksch J, Inchley J, Hamrik Z, Finne E, Kolip P. Trends in television time, non-gaming PC  
20  
21 use and moderate-to-vigorous physical activity among German adolescents 2002–2010. *BMC*  
22  
23 *Public Health*. 2014;14(351):1-10.  
24  
25 38. Verloigne M, Lippevelde W, Maes L, Yildirim M, Chinapaw M, Manios Y. Levels of physical  
26  
27 activity and sedentary time among 10- to 12-year-old boys and girls across 5 European  
28  
29 countries using accelerometers: an observational study within the ENERGY-project. *Int J*  
30  
31 *Behav Nutr Phys Act*. 2012;9(34):1-8.  
32  
33 39. Robert Koch-Institut. *Gesundheitsberichterstattung Des Bundes*. Vol 21.; 2004.  
34  
35 40. Lampert T, Mensink G, Romahn N, Woll A. Physical activity among children and adolescents  
36  
37 in Germany. Results of the German Health Interview and Examination Survey for Children and  
38  
39 Adolescents (KiGGS). *Bundesgesundheitsblatt Gesundheitsforschung Gesundheitsschutz*.  
40  
41 2007;50:634-642.  
42  
43 41. Lakes T, Burkart K. Childhood overweight in Berlin: intra-urban differences and underlying  
44  
45 influencing factors. *Int J Health Geogr*. 2016;15(1):12.  
46  
47 42. Senatsverwaltung für Gesundheit Umwelt und Verbraucherschutz. *Grundausswertung Der*  
48  
49 *Einschulungsdaten in Berlin 2010.*; 2010.  
50  
51 43. Merrill RM, Richardson JS. Validity of Self-Reported Height, Weight, and Body Mass Index:  
52  
53 Findings from the National Health and Nutrition Examination Survey, 2001-2006. *Prev*  
54  
55 *Chronic Dis*. 2009;6(4):A121.  
56  
57 44. Riley AW. Evidence That School-Age Children Can Self-Report on Their Health. *Ambul*  
58  
59  
60

1  
2  
3 *Pediatr.* 2004;4(4):371.  
4  
5  
6  
7  
8  
9  
10  
11  
12  
13  
14  
15  
16  
17  
18  
19  
20  
21  
22  
23  
24  
25  
26  
27  
28  
29  
30  
31  
32  
33  
34  
35  
36  
37  
38  
39  
40  
41  
42  
43  
44  
45  
46  
47  
48  
49  
50  
51  
52  
53  
54  
55  
56  
57  
58  
59  
60

For peer review only

**Figures**

Figure 1. Flowchart of the recruitment process

Figure 2. Multivariable analysis of influencing factors on physical activity of 12 and 13 year old students

Figure 3. Multivariable analysis of influencing factors on sedentary behavior of 12 and 13 years old students

**Supplementary files**

Supplementary table 1. Multivariable analysis of influencing factors on physical activity of 12 and 13 year old students.

Supplementary table 2. Multivariable analysis of influencing factors on sedentary behavior of 12 and 13 year old students.

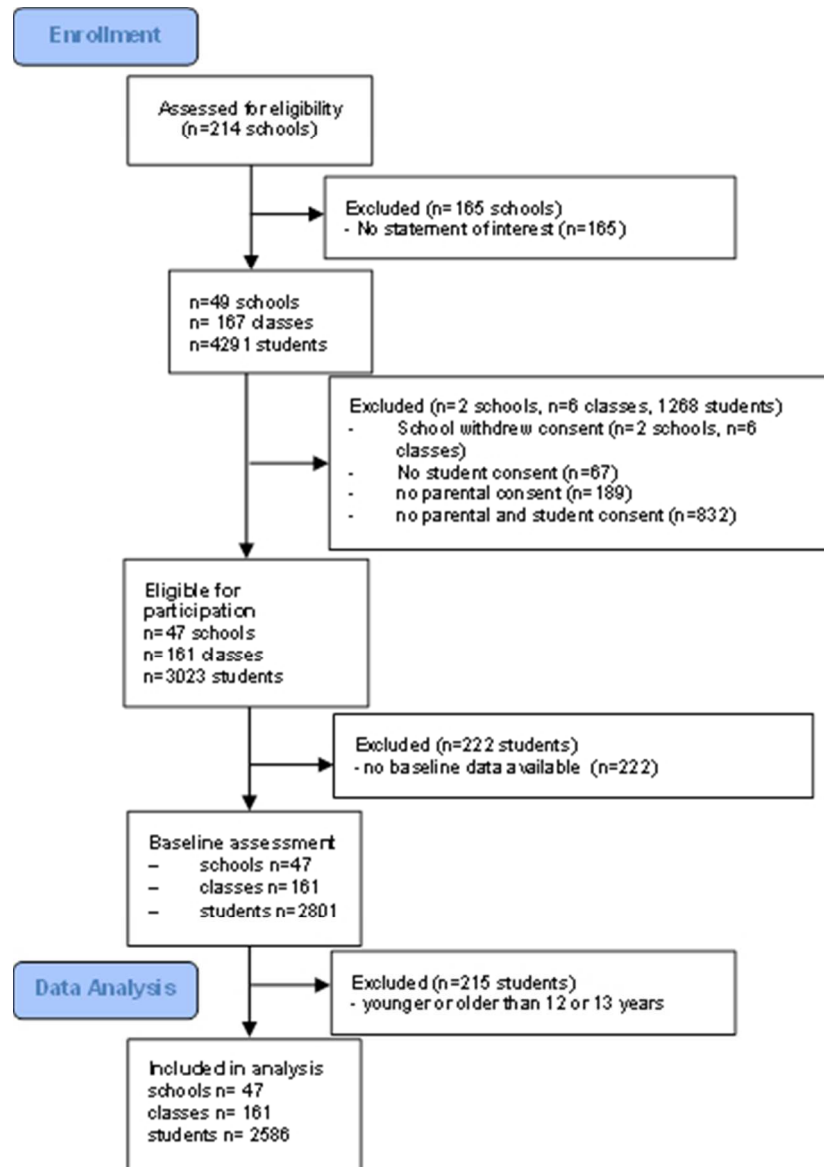

Figure 1. Flowchart of the recruitment process

108x154mm (96 x 96 DPI)

1  
2  
3  
4  
5  
6  
7  
8  
9  
10  
11  
12  
13  
14  
15  
16  
17  
18  
19  
20  
21  
22  
23  
24  
25  
26  
27  
28  
29  
30  
31  
32  
33  
34  
35  
36  
37  
38  
39  
40  
41  
42  
43  
44  
45  
46  
47  
48  
49  
50  
51  
52  
53  
54  
55  
56  
57  
58  
59  
60

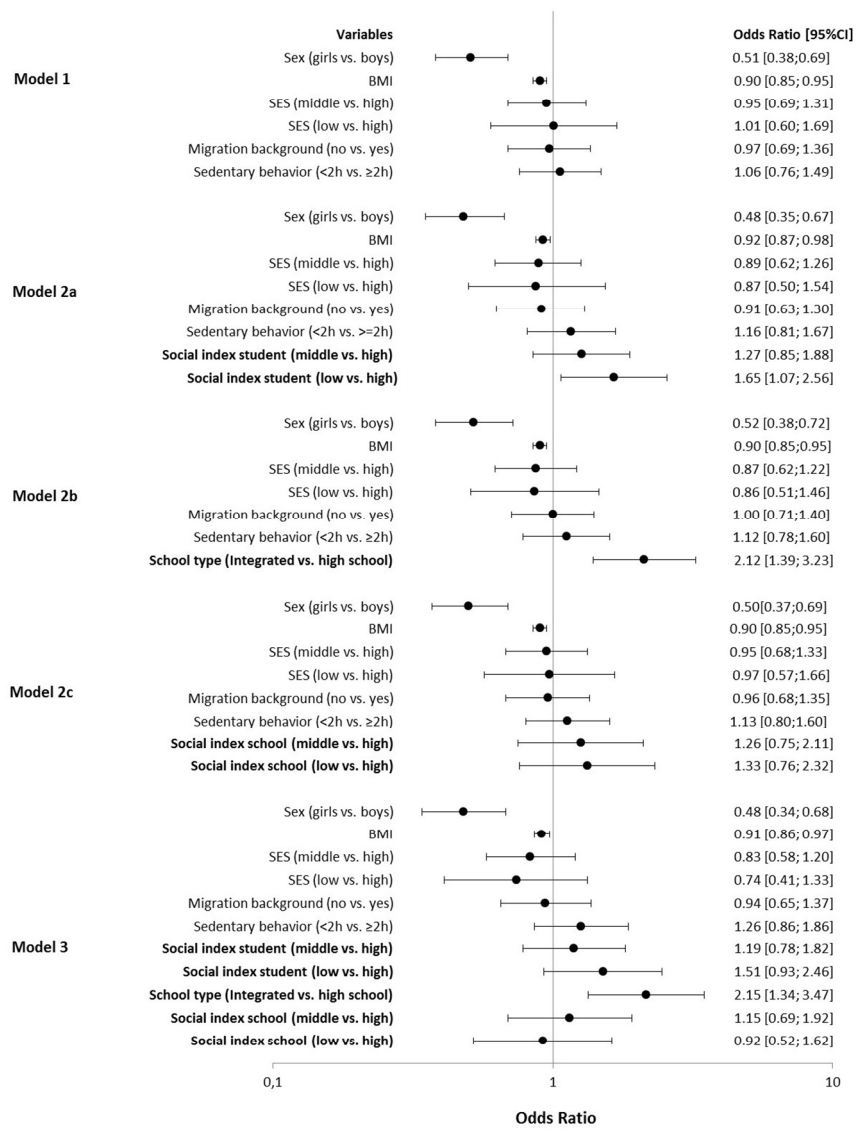

Figure 2. Multivariable analysis of influencing factors on physical activity of 12 and 13 year old students

369x425mm (96 x 96 DPI)

1  
2  
3  
4  
5  
6  
7  
8  
9  
10  
11  
12  
13  
14  
15  
16  
17  
18  
19  
20  
21  
22  
23  
24  
25  
26  
27  
28  
29  
30  
31  
32  
33  
34  
35  
36  
37  
38  
39  
40  
41  
42  
43  
44  
45  
46  
47  
48  
49  
50  
51  
52  
53  
54  
55  
56  
57  
58  
59  
60

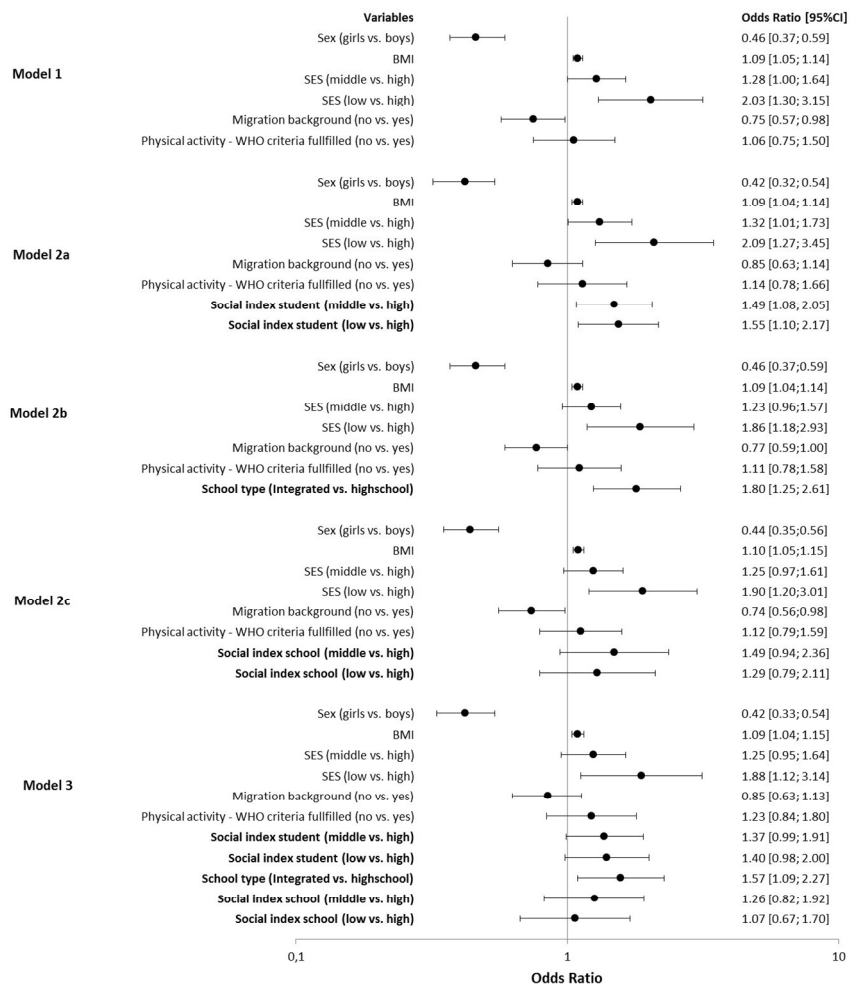

Figure 3. Multivariable analysis of influencing factors on sedentary behavior of 12 and 13 years old students

419x497mm (96 x 96 DPI)



Supplementary table 1: Multivariable analysis of influencing factors on physical activity of 12 and 13 year old students.

| WHO criteria for physical activity (at least 60 minutes per day physically active) fulfilled: |                   |         |                      |                      |                     |                                       |                     |              |
|-----------------------------------------------------------------------------------------------|-------------------|---------|----------------------|----------------------|---------------------|---------------------------------------|---------------------|--------------|
|                                                                                               | Model 1* (n=1595) |         | Model 2a<br>(n=1381) | Model 2b<br>(n=1595) | Model 2c** (n=1527) |                                       | Model 3*** (n=1364) |              |
|                                                                                               | OR (95% CI)       | p-value | OR (95% CI)          | OR (95% CI)          | OR (95% CI)         | p-value                               | OR (95% CI)         | p-value      |
| <b>Sex</b>                                                                                    |                   | <0.001  |                      |                      |                     | <0.001 (2a,b,c)                       |                     | <0.001       |
| Boys                                                                                          | 1                 |         | 1                    | 1                    | 1                   |                                       | 1                   |              |
| Girls                                                                                         | 0.51 (0.38; 0.69) |         | 0.48 (0.35; 0.67)    | 0.52 (0.38;0.72)     | 0.50(0.37;0.69)     |                                       | 0.48 (0.34; 0.68)   |              |
| <b>BMI</b>                                                                                    | 0.90 (0.85; 0.95) | <.001   | 0.92 (0.87; 0.98)    | 0.90 (0.85;0.95)     | 0.90 (0.85;0.95)    | <b>0.006 (2a); &lt;0.001 (2b,c)</b>   | 0.91 (0.86; 0.97)   | <b>0.003</b> |
| <b>Individual socioeconomic status (FAS)</b>                                                  |                   | 0.940   | -                    |                      |                     | 0.763 (2a); 0.684 (2b);<br>0.959 (2c) |                     | 0.476        |
| High                                                                                          | 1                 |         | 1                    | 1                    | 1                   |                                       | 1                   |              |
| Middle                                                                                        | 0.95 (0.69; 1.31) |         | 0.89 (0.62; 1.26)    | 0.87 (0.62;1.22)     | 0.95 (0.68;1.33)    |                                       | 0.83 (0.58; 1.20)   |              |
| Low                                                                                           | 1.01 (0.60; 1.69) |         | 0.87 (0.50; 1.54)    | 0.86 (0.51;1.46)     | 0.97 (0.57;1.66)    |                                       | 0.74 (0.41; 1.33)   |              |
| <b>Migration background</b>                                                                   |                   | 0.844   |                      |                      |                     | 0.588 (2a); 0.981 (2b);<br>0.798 (2c) |                     | 0.761        |
| yes                                                                                           | 1                 |         | 1                    | 1                    | 1                   |                                       | 1                   |              |
| no                                                                                            | 0.97 (0.69; 1.36) |         | 0.91 (0.63; 1.30)    | 1.00 (0.71;1.4)      | 0.96 (0.68;1.35)    |                                       | 0.94 (0.65; 1.37)   |              |
| <b>Sedentary behaviour</b>                                                                    |                   | 0.734   | -                    |                      |                     | 0.425 (2a); 0.540 (2b);<br>0.494 (2c) |                     | 0.233        |
| ≥2 hours                                                                                      | 1                 |         | 1                    | 1                    | 1                   |                                       | 1                   |              |
| <2 hours                                                                                      | 1.06 (0.76; 1.49) |         | 1.16 (0.81; 1.67)    | 1.12 (0.78;1.60)     | 1.13 (0.80;1.60)    |                                       | 1.26 (0.86; 1.86)   |              |
| <b>Student's neighborhood SES</b>                                                             | -                 | -       |                      | -                    | -                   | 0.079                                 |                     | 0.253        |
| High (rank 1-2)                                                                               | -                 | -       | 1                    | -                    | -                   |                                       | 1                   |              |
| Middle (rank 3-4)                                                                             | -                 | -       | 1.27 (0.85; 1.88)    | -                    | -                   |                                       | 1.19 (0.78; 1.82)   |              |
| Low (rank 5-7)                                                                                | -                 | -       | 1.65 (1.07; 2.56)    | -                    | -                   |                                       | 1.51 (0.93; 2.46)   |              |
| <b>School type</b>                                                                            | -                 | -       | -                    |                      | -                   | <0.001                                |                     | <b>0.002</b> |
| High School                                                                                   | -                 | -       | -                    | 1                    | -                   |                                       | 1                   |              |
| Integrated Secondary School                                                                   | -                 | -       | -                    | 2.12 (1.39; 3.23)    | -                   |                                       | 2.15 (1.34; 3.47)   |              |
| <b>Schools' neighborhood SES</b>                                                              | -                 | -       | -                    | -                    | -                   | 0.546                                 |                     | 0.723        |
| High (rank 1-2)                                                                               | -                 | -       | -                    | -                    | 1                   | -                                     | 1                   |              |
| Middle (rank 3-4)                                                                             | -                 | -       | -                    | -                    | 1.26 (0.75; 2.11)   | -                                     | 1.15 (0.69; 1.92)   |              |
| Low (rank 5-7)                                                                                | -                 | -       | -                    | -                    | 1.33 (0.76; 2.32)   | -                                     | 0.92 (0.52; 1.62)   |              |

\*Model 1: Sex, BMI, individual socioeconomic status (FAS), migration background, sedentary behavior; \*\*Model 2a: Model 1+ student's neighborhood SES (3 categories);

Model 2b: Model 1+ school type; Model 2c: Model 1 + schools' neighborhood SES (3 categories); \*\*\*Model 3: Model 1+2a,b,c

Supplementary table 2: Multivariable analysis of influencing factors on sedentary behavior of 12 and 13 year old students

| High sedentary behaviour (≥2 hours /day)          |                   |                  |                     |                     |                     |                                           |                     |                  |
|---------------------------------------------------|-------------------|------------------|---------------------|---------------------|---------------------|-------------------------------------------|---------------------|------------------|
|                                                   | Model 1* (n=1595) |                  | Model 2a** (n=1381) | Model 2b** (n=1595) | Model 2c** (n=1527) |                                           | Model 3*** (n=1364) |                  |
|                                                   | OR (95% CI)       | p-value          | OR (95% CI)         | OR (95% CI)         | OR (95% CI)         | p-value                                   | OR (95% CI)         | p-value          |
| <b>Sex</b>                                        |                   | <b>&lt;0.001</b> |                     |                     |                     | <b>&lt;0.001 (2a,b,c)</b>                 |                     | <b>&lt;0.001</b> |
| Boys                                              | 1                 |                  | 1                   | 1                   | 1                   |                                           | 1                   |                  |
| Girls                                             | 0.46 (0.37; 0.59) |                  | 0.42 (0.32; 0.54)   | 0.46 (0.37;0.59)    | 0.44 (0.35;0.56)    |                                           | 0.42 (0.33; 0.54)   |                  |
| <b>BMI</b>                                        | 1.09 (1.05; 1.14) | <b>&lt;0.001</b> | 1.09 (1.04; 1.14)   | 1.09 (1.04;1.14)    | 1.10 (1.05;1.15)    | <b>&lt;0.001 (2a,b,c)</b>                 | 1.09 (1.04; 1.15)   | <b>&lt;0.001</b> |
| <b>Individual socioeconomic status (FAS)</b>      |                   | <b>0.004</b>     |                     |                     |                     | <b>0.007 (2a); 0.018 (2b); 0.014 (2c)</b> |                     | <b>0.036</b>     |
| High                                              | 1                 |                  | 1                   | 1                   | 1                   | 1                                         | 1                   |                  |
| Middle                                            | 1.28 (1.00; 1.64) |                  | 1.32 (1.01; 1.73)   | 1.23 (0.96;1.57)    | 1.25 (0.97;1.61)    |                                           | 1.25 (0.95; 1.64)   |                  |
| Low                                               | 2.03 (1.30; 3.15) |                  | 2.09 (1.27; 3.45)   | 1.86 (1.18;2.93)    | 1.90 (1.20;3.01)    |                                           | 1.88 (1.12; 3.14)   |                  |
| <b>Migration background</b>                       |                   | <b>0.035</b>     |                     |                     |                     | 0.267 (2a); 0.052 (2b); <b>0.032 (2c)</b> |                     | 0.262            |
| yes                                               | 1                 |                  | 1                   | 1                   | 1                   |                                           | 1                   |                  |
| no                                                | 0.75 (0.57; 0.98) |                  | 0.85 (0.63; 1.14)   | 0.77 (0.59;1.00)    | 0.74 (0.56;0.98)    |                                           | 0.85 (0.63; 1.13)   |                  |
| <b>Physical activity (WHO criteria fulfilled)</b> |                   | 0.738            |                     |                     |                     | 0.510 (2a); 0.558 (2b); 0.533 (2c)        |                     | 0.297            |
| Yes                                               | 1                 |                  | 1                   | 1                   | 1                   |                                           | 1                   |                  |
| No                                                | 1.06 (0.75; 1.50) |                  | 1.14 (0.78; 1.66)   | 1.11 (0.78;1.58)    | 1.12 (0.79;1.59)    |                                           | 1.23 (0.84; 1.80)   |                  |
| <b>Student's neighborhood SES</b>                 | -                 | -                | <b>Model 2a</b>     | -                   | -                   | <b>0.019</b>                              |                     | 0.109            |
| High (rank 1-2)                                   | -                 | -                | 1                   | -                   | -                   |                                           | <b>1</b>            |                  |
| Middle (rank 3-4)                                 | -                 | -                | 1.49 (1.08; 2.05)   | -                   | -                   |                                           | 1.37 (0.99; 1.91)   |                  |
| Low (rank 5-7)                                    | -                 | -                | 1.55 (1.10; 2.17)   | -                   | -                   |                                           | 1.40 (0.98; 2.00)   |                  |
| <b>School type</b>                                | -                 | -                | -                   | <b>Model 2b</b>     | -                   | <b>0.002</b>                              |                     | <b>0.016</b>     |
| High School                                       | -                 | -                | -                   | <b>1</b>            | -                   | -                                         | <b>1</b>            |                  |
| Integrated Secondary School                       | -                 | -                | -                   | 1.80 (1.25; 2.61)   | -                   | -                                         | 1.57 (1.09; 2.27)   |                  |
| <b>Schools' neighborhood SES</b>                  | -                 | -                | -                   | -                   | <b>Model 2c</b>     | 0.233                                     |                     | 0.535            |
| High (rank 1-2)                                   | -                 | -                | -                   | -                   | <b>1</b>            | -                                         | <b>1</b>            |                  |
| Middle (rank 3-4)                                 | -                 | -                | -                   | -                   | 1.49 (0.94; 2.36)   | -                                         | 1.26 (0.82; 1.92)   |                  |
| Low (rank 5-7)                                    | -                 | -                | -                   | -                   | 1.29 (0.79; 2.11)   | -                                         | 1.07 (0.67; 1.70)   |                  |

\*Model 1: Sex, BMI, individual socioeconomic status (FAS), migration background, physical activity; \*\*Model 2a: Model 1+ student's neighborhood SES (3 categories);

Model 2b: Model 1+ school type; Model 2c: Model 1 + schools' neighborhood SES (3 categories); \*\*\*Model 3: Model 1+2a,b,c

## STROBE (Strengthening The Reporting of OBServational Studies in Epidemiology) Checklist

A checklist of items that should be included in reports of observational studies. You must report the page number in your manuscript where you consider each of the items listed in this checklist. If you have not included this information, either revise your manuscript accordingly before submitting or note N/A.

**Note:** An Explanation and Elaboration article discusses each checklist item and gives methodological background and published examples of transparent reporting. The STROBE checklist is best used in conjunction with this article (freely available on the Web sites of PLoS Medicine at <http://www.plosmedicine.org/>, Annals of Internal Medicine at <http://www.annals.org/>, and Epidemiology at <http://www.epidem.com/>). Information on the STROBE Initiative is available at [www.strobe-statement.org](http://www.strobe-statement.org).

| Section and Item     | Item No. | Recommendation                                                                                                                                                                                                                                                                                                                                                                                                                                                                 | Reported on Page No. |
|----------------------|----------|--------------------------------------------------------------------------------------------------------------------------------------------------------------------------------------------------------------------------------------------------------------------------------------------------------------------------------------------------------------------------------------------------------------------------------------------------------------------------------|----------------------|
| Title and Abstract   | 1        | (a) Indicate the study's design with a commonly used term in the title or the abstract                                                                                                                                                                                                                                                                                                                                                                                         |                      |
|                      |          | (b) Provide in the abstract an informative and balanced summary of what was done and what was found                                                                                                                                                                                                                                                                                                                                                                            |                      |
| <b>Introduction</b>  |          |                                                                                                                                                                                                                                                                                                                                                                                                                                                                                |                      |
| Background/Rationale | 2        | Explain the scientific background and rationale for the investigation being reported                                                                                                                                                                                                                                                                                                                                                                                           |                      |
| Objectives           | 3        | State specific objectives, including any prespecified hypotheses                                                                                                                                                                                                                                                                                                                                                                                                               |                      |
| <b>Methods</b>       |          |                                                                                                                                                                                                                                                                                                                                                                                                                                                                                |                      |
| Study Design         | 4        | Present key elements of study design early in the paper                                                                                                                                                                                                                                                                                                                                                                                                                        |                      |
| Setting              | 5        | Describe the setting, locations, and relevant dates, including periods of recruitment, exposure, follow-up, and data collection                                                                                                                                                                                                                                                                                                                                                |                      |
| Participants         | 6        | (a) <i>Cohort study</i> —Give the eligibility criteria, and the sources and methods of selection of participants. Describe methods of follow-up<br><br><i>Case-control study</i> —Give the eligibility criteria, and the sources and methods of case ascertainment and control selection. Give the rationale for the choice of cases and controls<br><br><i>Cross-sectional study</i> —Give the eligibility criteria, and the sources and methods of selection of participants |                      |
|                      |          | (b) <i>Cohort study</i> —For matched studies, give matching criteria and number of exposed and unexposed<br><br><i>Case-control study</i> —For matched studies, give matching criteria and the number of controls per case                                                                                                                                                                                                                                                     |                      |
| Variables            | 7        | Clearly define all outcomes, exposures, predictors, potential confounders, and effect modifiers. Give diagnostic criteria, if applicable                                                                                                                                                                                                                                                                                                                                       |                      |

| Section and Item             | Item No. | Recommendation                                                                                                                                                                                                                                                                                            | Reported on Page No. |
|------------------------------|----------|-----------------------------------------------------------------------------------------------------------------------------------------------------------------------------------------------------------------------------------------------------------------------------------------------------------|----------------------|
| Data Sources/<br>Measurement | 8*       | For each variable of interest, give sources of data and details of methods of assessment (measurement). Describe comparability of assessment methods if there is more than one group                                                                                                                      |                      |
| Bias                         | 9        | Describe any efforts to address potential sources of bias                                                                                                                                                                                                                                                 |                      |
| Study Size                   | 10       | Explain how the study size was arrived at                                                                                                                                                                                                                                                                 |                      |
| Quantitative Variables       | 11       | Explain how quantitative variables were handled in the analyses. If applicable, describe which groupings were chosen and why                                                                                                                                                                              |                      |
| Statistical Methods          | 12       | (a) Describe all statistical methods, including those used to control for confounding                                                                                                                                                                                                                     |                      |
|                              |          | (b) Describe any methods used to examine subgroups and interactions                                                                                                                                                                                                                                       |                      |
|                              |          | (c) Explain how missing data were addressed                                                                                                                                                                                                                                                               |                      |
|                              |          | (d) <i>Cohort study</i> —If applicable, explain how loss to follow-up was addressed<br><i>Case-control study</i> —If applicable, explain how matching of cases and controls was addressed<br><i>Cross-sectional study</i> —If applicable, describe analytical methods taking account of sampling strategy |                      |
|                              |          | (e) Describe any sensitivity analyses                                                                                                                                                                                                                                                                     |                      |
| <b>Results</b>               |          |                                                                                                                                                                                                                                                                                                           |                      |
| Participants                 | 13*      | (a) Report numbers of individuals at each stage of study—eg numbers potentially eligible, examined for eligibility, confirmed eligible, included in the study, completing follow-up, and analysed                                                                                                         |                      |
|                              |          | (b) Give reasons for non-participation at each stage                                                                                                                                                                                                                                                      |                      |
|                              |          | (c) Consider use of a flow diagram                                                                                                                                                                                                                                                                        |                      |
| Descriptive Data             | 14*      | (a) Give characteristics of study participants (eg demographic, clinical, social) and information on exposures and potential confounders                                                                                                                                                                  |                      |
|                              |          | (b) Indicate number of participants with missing data for each variable of interest                                                                                                                                                                                                                       |                      |
|                              |          | (c) <i>Cohort study</i> —Summarise follow-up time (eg, average and total amount)                                                                                                                                                                                                                          |                      |
| Outcome Data                 | 15*      | <i>Cohort study</i> —Report numbers of outcome events or summary measures over time                                                                                                                                                                                                                       |                      |
|                              |          | <i>Case-control study</i> —Report numbers in each exposure category, or summary measures of exposure                                                                                                                                                                                                      |                      |
|                              |          | <i>Cross-sectional study</i> —Report numbers of outcome events or summary measures                                                                                                                                                                                                                        |                      |

| Section and Item         | Item No. | Recommendation                                                                                                                                                                                               | Reported on Page No. |
|--------------------------|----------|--------------------------------------------------------------------------------------------------------------------------------------------------------------------------------------------------------------|----------------------|
| Main Results             | 16       | (a) Give unadjusted estimates and, if applicable, confounder-adjusted estimates and their precision (eg, 95% confidence interval). Make clear which confounders were adjusted for and why they were included |                      |
|                          |          | (b) Report category boundaries when continuous variables were categorized                                                                                                                                    |                      |
|                          |          | (c) If relevant, consider translating estimates of relative risk into absolute risk for a meaningful time period                                                                                             |                      |
| Other Analyses           | 17       | Report other analyses done—eg analyses of subgroups and interactions, and sensitivity analyses                                                                                                               |                      |
| <b>Discussion</b>        |          |                                                                                                                                                                                                              |                      |
| Key Results              | 18       | Summarise key results with reference to study objectives                                                                                                                                                     |                      |
| Limitations              | 19       | Discuss limitations of the study, taking into account sources of potential bias or imprecision. Discuss both direction and magnitude of any potential bias                                                   |                      |
| Interpretation           | 20       | Give a cautious overall interpretation of results considering objectives, limitations, multiplicity of analyses, results from similar studies, and other relevant evidence                                   |                      |
| Generalisability         | 21       | Discuss the generalisability (external validity) of the study results                                                                                                                                        |                      |
| <b>Other Information</b> |          |                                                                                                                                                                                                              |                      |
| Funding                  | 22       | Give the source of funding and the role of the funders for the present study and, if applicable, for the original study on which the present article is based                                                |                      |

\*Give information separately for cases and controls in case-control studies and, if applicable, for exposed and unexposed groups in cohort and cross-sectional studies.

**Once you have completed this checklist, please save a copy and upload it as part of your submission. DO NOT include this checklist as part of the main manuscript document. It must be uploaded as a separate file.**

# BMJ Open

## Association of individual and neighbourhood socioeconomic status with physical activity and screen time in 7th graders in Berlin, Germany

|                                 |                                                                                                                                                                                                                                                                                                                                                                                                                                                                                                                                                                                                                                                                                                                                                                                                                                                                                                                              |
|---------------------------------|------------------------------------------------------------------------------------------------------------------------------------------------------------------------------------------------------------------------------------------------------------------------------------------------------------------------------------------------------------------------------------------------------------------------------------------------------------------------------------------------------------------------------------------------------------------------------------------------------------------------------------------------------------------------------------------------------------------------------------------------------------------------------------------------------------------------------------------------------------------------------------------------------------------------------|
| Journal:                        | <i>BMJ Open</i>                                                                                                                                                                                                                                                                                                                                                                                                                                                                                                                                                                                                                                                                                                                                                                                                                                                                                                              |
| Manuscript ID                   | bmjopen-2017-017974.R1                                                                                                                                                                                                                                                                                                                                                                                                                                                                                                                                                                                                                                                                                                                                                                                                                                                                                                       |
| Article Type:                   | Research                                                                                                                                                                                                                                                                                                                                                                                                                                                                                                                                                                                                                                                                                                                                                                                                                                                                                                                     |
| Date Submitted by the Author:   | 14-Aug-2017                                                                                                                                                                                                                                                                                                                                                                                                                                                                                                                                                                                                                                                                                                                                                                                                                                                                                                                  |
| Complete List of Authors:       | Krist, Lilian; Charité University Medical Center, Institute for Social Medicine, Epidemiology and Health Economics<br>Bürger, Christin; Charité-Universitätsmedizin Berlin, Institute for Social Medicine, Epidemiology and Health Economics<br>Ströbele-Benschop, Nanette; , University of Hohenheim, 3 Institute of Nutritional Medicine<br>Roll, Stephanie; Charité Universitätsmedizin, Institute for Social Medicine, Epidemiology and Health Economics<br>Lotz, Fabian; Charité-Universitätsmedizin Berlin, Institute for Social Medicine, Epidemiology and Health Economics<br>Rieckmann, Nina; Charité Universitätsmedizin, Berlin School of Public Health<br>Muller-Nordhorn, Jacqueline; Universitätsmedizin Berlin, Berlin School of Public Health<br>Willich, Stefan; Charité University Medical Center<br>Müller-Riemenschneider, Falk; National University of Singapore, Saw Swee HOck School of Public Health |
| <b>Primary Subject Heading</b>: | Public health                                                                                                                                                                                                                                                                                                                                                                                                                                                                                                                                                                                                                                                                                                                                                                                                                                                                                                                |
| Secondary Subject Heading:      | Epidemiology, Sociology, Sports and exercise medicine                                                                                                                                                                                                                                                                                                                                                                                                                                                                                                                                                                                                                                                                                                                                                                                                                                                                        |
| Keywords:                       | EPIDEMIOLOGY, Community child health < PAEDIATRICS, PREVENTIVE MEDICINE, PUBLIC HEALTH, SPORTS MEDICINE, SOCIAL MEDICINE                                                                                                                                                                                                                                                                                                                                                                                                                                                                                                                                                                                                                                                                                                                                                                                                     |
|                                 |                                                                                                                                                                                                                                                                                                                                                                                                                                                                                                                                                                                                                                                                                                                                                                                                                                                                                                                              |

SCHOLARONE™  
Manuscripts

1  
2  
3 **Association of individual and neighbourhood socioeconomic status with**  
4 **physical activity and screen time in 7<sup>th</sup> graders in Berlin, Germany**  
5  
6

7 *Lilian Krist<sup>1</sup>, Christin Bürger<sup>1</sup>, Nanette Ströbele-Benschop<sup>2</sup>, Stephanie Roll<sup>1</sup>, Fabian Lotz<sup>1</sup>,*  
8 *Nina Rieckmann<sup>2</sup>, Jacqueline Müller-Nordhorn<sup>2</sup>, Stefan N. Willich<sup>1</sup>, Falk Müller-*  
9 *Riemenschneider<sup>1,3</sup>*  
10  
11  
12

- 13  
14  
15 1. *Institute for Social Medicine, Epidemiology and Health Economics, Charité - Universi-*  
16 *tätsmedizin Berlin, Germany*
- 17  
18 2. *Institute of Nutritional Medicine, University of Hohenheim, Germany*
- 19  
20 3. *Institute of Public Health, Charité-Universitätsmedizin Berlin, Germany*
- 21  
22 4. *Saw Swee Hock School of Public Health, National University of Singapore*  
23  
24  
25  
26

27 **Corresponding author:**

28  
29 Dr. Lilian Krist  
30 Institute for Social Medicine, Epidemiology and Health Economics  
31 Charité - Universitätsmedizin Berlin  
32 Luisenstr. 57  
33 10117 Berlin, Germany  
34 E-Mail: [lilian.krist@charite.de](mailto:lilian.krist@charite.de)  
35 Tel: +49 30 450 529 109  
36  
37  
38  
39

40 **Word count: 3417**

41  
42 **Keywords:** neighbourhood socioeconomic status, physical activity, screen time, adolescents  
43  
44  
45  
46  
47  
48  
49  
50  
51  
52  
53  
54  
55  
56  
57  
58  
59  
60

## ABSTRACT

**Objectives** Few studies have explored the impact of neighbourhood socioeconomic status (SES) on health behaviour in youths. Our aim was to investigate the association of individual and neighbourhood socioeconomic status with physical activity (PA) and screen time (ST) in 12-13 years old students in Berlin, Germany.

**Design** Cross-sectional study.

**Setting** Secondary schools (high schools and integrated secondary schools) in Berlin, Germany.

**Participants** A total of 2586 students aged 12-13 years (7<sup>th</sup> grade).

**Main outcome measures** Sociodemographics, anthropometric data and health behaviour were assessed by self-report during classes. Primary outcome was the association of individual and neighbourhood SES with daily PA and daily ST. Students' characteristics were described with means or percentages. Comparisons were performed with Generalized Linear Mixed Model yielding odds ratios with 95% confidence intervals.

**Results** Mean ( $\pm$ SD) age was 12.5 $\pm$ 0.5 years, 50.5% were girls, and 34.1% had a migrant background. Individual SES was only associated with screen time. The odds ratio of engaging in more than two hours of ST per day was 1.28 [1.00;1.64] and 2.03 [1.30;3.15] for students with middle and low SES, respectively, compared to students with high SES. Neighbourhood SES was associated with both, PA and ST. The odds ratios of spending more than 60 minutes per day in PA and of engaging in more than two hours of ST per day in screen time were 1.67 [1.14;2.44] and 1.68 [1.22;2.29], respectively, each for students with low compared to high neighbourhood SES.

**Conclusions** Both, individual and neighbourhood SES as well as school type are important factors that have to be considered, when developing prevention programs for school students. Future research should include measurement of the built environment in Berlin to provide further insights into the associations with PA.



## Strengths and limitations of the study

- This study provides important new insights into the association of individual and neighbourhood socioeconomic status with physical activity and screen time in school students in Berlin, Germany.
- The study sample was very large with students recruited from all 12 districts of Berlin. It comprised a variety of neighbourhoods with different levels of socioeconomic status. Also, the amount of students with migration background reflected the proportion of the student population of Berlin.
- Anthropometric data and physical activity were not assessed objectively but via self-report.
- Only screen time was assessed, while other kinds of sedentary behaviours were not taken into account.

## INTRODUCTION

Physical activity as well as sedentary behaviour have an important impact on health and wellbeing(1).

Low levels of physical activity are associated with higher health risks already among children and adolescents(2) and an increasing number of studies have identified sedentary behaviour as an independent risk factor for diseases such as diabetes and obesity in children and adolescents(3).

In the last decades however, sedentary behaviour among children and adolescents is increasing while the rates of children being active appears to be decreasing over time(4,5). Screen time (time spent watching TV or playing games on the computer or playing video games) is one important aspect of sedentary behaviour, even though it does not represent the overall sedentary time (6).

In most developed countries, including Germany, a decline in physical activity among children and adolescents can be found with higher age(7). The percentage of boys and girls in the German Health Interview and Examination Survey for children and adolescents (KiGGS) fulfilling the WHO recommendations for physical activity was 51.5% for the age group 3-6 years (boys 52.2%, girls 50.7%) and 11.5% in the age group 14-17 (boys 15.0%, girls 8.0%). Over half of the girls and nearly three quarters of the boys spent more than two hours per day sitting while using computer, TV or video games(5).

While there is evidence of an association of age and sex with physical activity(8), studies exploring the influence of socioeconomic status and built and social environment of children show heterogeneous results(9-11).

A low SES is often associated with a higher BMI and more sedentary time, but not always with low physical activity(12-14). Studies investigating the social environment of children found evidence of an association with physical activity and diet(15-17).

Another aspect of the social environment is the neighbourhood socioeconomic status. Studies investigating the influence of neighbourhood SES on health showed an association of disadvantaged neighbourhoods with worse health status(18) or a higher risk for cardiovascular diseases(19). Mechanisms through which a lower neighbourhood socioeconomic status may influence physical activity and sedentary behaviour could be reduced municipal services such as recreational facilities and playgrounds, financial stress or less possibilities to own a gym membership(17). Regarding physical activity or sedentary behaviour, study results are heterogeneous ranging from no association to a clear association

1  
2  
3 with neighbourhood SES (20–22). Other studies in turn found that the neighbourhood SES was a posi-  
4 tive modifier for the association of environmental factors with physical activity and sedentary behav-  
5 iour(23,24). Knowing more about the influence of SES would make it possible to develop more tar-  
6 geted prevention strategies for vulnerable groups.  
7  
8  
9

10 Our aim was therefore to investigate the influence of individual and neighbourhood socioeconomic  
11 status with physical activity and screen time as one important form of sedentary behaviour in a popula-  
12 tion based sample of 12 to 13 year old secondary school students in Berlin, Germany.  
13  
14  
15  
16  
17  
18

## 19 **METHODS**

### 20 **Study design and setting**

21  
22 The present cross-sectional analysis is part of the BEST-prevention study, a three armed cluster ran-  
23 domized controlled trial that was conducted from 2010 to 2014 (baseline assessment was conducted  
24 from 2010 to 2011) with the aim to evaluate a parent involving smoking prevention program for 7<sup>th</sup>  
25 grade students in Berlin(25). Here, we report cross-sectional data regarding physical activity and  
26 screen time among the students at baseline including associations with individual and neighbourhood  
27 socioeconomic status.  
28  
29  
30  
31  
32  
33  
34  
35  
36  
37

### 38 **Participants and Recruitment**

39  
40 Details of the recruitment are described elsewhere(26). Briefly, prior to recruitment, permission of the  
41 Berlin senate of education, youth and research (Senatsverwaltung für Bildung, Jugend und Wissen-  
42 schaft) was obtained, and school principals and contact teachers from all 12 districts of Berlin were  
43 informed about the project. Students were eligible for the study if they: i) were in the 7<sup>th</sup> grade, ii)  
44 attended one of the participating schools, and iii) showed intellectual and physical ability to make an  
45 informed decision about study participation. Separate signed written informed consent was required  
46 from participating students as well as from at least one parent/caregiver. The study was approved by  
47 the ethical review committee of the Charité-Universitätsmedizin Berlin, Germany.  
48  
49  
50  
51  
52  
53  
54  
55  
56  
57  
58  
59  
60

## Measurements

The study questionnaire is based on existing and validated questionnaires investigating adolescent health behaviour (e.g. Health Behaviour in School Aged Children, HBSC(27); German Children and Youths Survey, KIGGS(28)). It includes questions related to socio-demographics, smoking and other health behaviours, such as alcohol consumption, nutrition, physical activity and screen time, as well as height and weight. It took about 30-40 minutes to complete the questionnaire. Our study group has the status of an associated project of the HBSC.

During a first visit to schools, the BEST study was presented to the students by trained research personnel and consent forms were distributed for students and parents/caregivers. During the second visit, which took place a few weeks later, baseline data were assessed with the questionnaire in the classroom among children, who had provided both consent forms..

## Outcome measures

### Physical activity

Physical activity (PA) was assessed using three adapted items of the HBSC questionnaire. The first question was assessed by asking: 'On how many days in the past week were you physically active for at least 60 minutes?' According to the WHO guidelines, for our primary outcome we defined a student as meeting current guidelines if he or she was active at least 60 minutes on each of the last seven days (yes/no)(29). The other questions asked for the number of days and hours of moderate intensity physical activity per week.

### Screen time

Screen time (ST) was assessed with two questions (as well of the HBSC questionnaire) asking for the time spent each day watching TV or playing with the Computer. TV time was assessed by asking 'How many hours/day do you usually watch television in your free time?' for weekdays and weekend days separately. Computer time (minutes/day) was assessed by asking 'How many hours/day do you usually play games on a computer, or use a game console in your leisure time?'. Total screen time was computed by adding up TV and computer time. Using a smartphone or tablet was not assessed. Ac-

1  
2  
3 cording to the AAP(30) recommendations we defined more than 2 hours of screen time per day as  
4  
5 high screen time.  
6  
7

## 8 9 **Covariates**

### 10 11 Individual level

12  
13 Sex, age and anthropometric data (height and weight) of the students were assessed via self-report.  
14  
15 The BMI was calculated using the self-reported data. BMI categories are presented using cut-offs de-  
16  
17 fined by the specific percentiles which at age 18 years correspond to the adult cut-off points for un-  
18  
19 derweight ( $<18.5\text{kg/m}^2$ ), overweight ( $25\text{kg/m}^2$ ) and obesity ( $30\text{kg/m}^2$ ). According to that definition,  
20  
21 underweight is defined as a BMI  $<10^{\text{th}}$  percentile, normal weight as a BMI between the  $10^{\text{th}}$  and the  
22  
23  $90^{\text{th}}$  percentile, overweight as a BMI between the  $90^{\text{th}}$  and the  $97^{\text{th}}$  percentile and obesity as a BMI  
24  
25  $\geq 97^{\text{th}}$  percentile(31,32).  
26  
27

### 28 29 Migration background

30  
31 A student was defined as having a migration background if he or she was not born in Germany or if at  
32  
33 least one parent was not born in Germany but moved to Germany after 1949(33).  
34  
35

### 36 37 Individual socioeconomic status

38  
39 To assess the individual socioeconomic status (SES) of the student, we used the family affluence scale  
40  
41 (FAS), a validated instrument to assess the material affluence of the family asking for the number of  
42  
43 cars and computers in the family, for holidays during the past 12 months, and whether the child has its  
44  
45 own room(34). The FAS consists of values from zero to seven, with higher values indicating higher  
46  
47 affluence, and can be categorized into three categories (low (0-3), moderate (4-5), and high affluence  
48  
49 (6-7)). The FAS was completely assessed only at the 24 months follow-up, we therefore used the 24  
50  
51 months follow-up FAS to describe family SES at baseline.  
52

### 53 54 Neighbourhood socioeconomic status

55  
56 For the SES of the students' neighbourhood, we used the social index defined and implemented by the  
57  
58 'Atlas of Social Structure' (Sozialstrukturatlas). It is an instrument used in Berlin to describe the social  
59  
60

1  
2  
3 situation of Berlin by classifying 447 sub-areas (with on average 7500 habitants) of the 12 districts of  
4 Berlin accordingly(35,36). This social index reflects the distribution of social and health burden in  
5 Berlin. Social and health indicators are e.g. unemployment, welfare reception rate, average per capita  
6 income and also premature mortality and avoidable deaths. The index ranges from 1 reflecting the best  
7 to 7 reflecting the worst social situation of a district.  
8  
9  
10  
11

### 12 13 14 School types

15  
16 In Berlin, two types of schools exist: high schools with the possibility to achieve a high-school diplo-  
17 ma after 12 years, as well as integrated secondary schools (an integration of different school types)  
18 with the possibility to achieve a high-school diploma after 13 years. More often than high schools,  
19 integrated secondary schools are left by the students after the 10<sup>th</sup> grade with a secondary school leav-  
20 ing certificate. The academic requirements are higher in high schools than in integrated secondary  
21 schools(37).  
22  
23  
24  
25  
26  
27

### 28 29 Schools' neighbourhood socioeconomic status

30  
31 .Since the neighbourhood of the school can be different to that of students, we assessed this infor-  
32 mation (analogous to the individual neighbourhood SES) as well in order to take an additional influ-  
33 encing factor of the students behavior into account.  
34  
35  
36  
37  
38

### 39 40 **Statistical analysis**

41  
42 All statistical analyses were performed for the 12 and 13 years old students due to the small number of  
43 students younger than 12 and older than 13 years (8.1%). We used all data available for the respective  
44 analysis; missing data were not imputed.  
45  
46

47  
48 Characteristics of schools and students were analysed by descriptive statistical methods (e.g. mean and  
49 standard deviation (SD), frequencies and percentages; p-values are derived from t-tests and chi-square-  
50 tests).  
51  
52

53  
54 Because of the nested structure of the data with both fixed and random effects, a generalized linear  
55 mixed model (GLMM) was used for the analysis when comparing groups (models with random inter-  
56 cept). In general, the random factors 'school' and 'class within school' (as nested factor) were includ-  
57 ed.  
58  
59  
60

1  
2  
3 ed into the models. For binary outcomes a logit link function was used, for continuous outcomes an  
4 identity link function was used (distribution family 'normal'). Results of logistic models are presented  
5 as odds ratios (OR) and 95%-confidence intervals (CI), results of linear models as Least-Square  
6 Means and 95%- CI. As sensitivity analyses, to assess if associations are modified by gender, interac-  
7 tion effects on gender were included into the models.  
8

9  
10  
11  
12 The same framework was used to determine the association of factors within a set of many factors in  
13 multivariable analyses. Here, we included sex, socioeconomic status (FAS-score), and migration  
14 background as categorical variables and BMI as continuous variable in our first model to investigate  
15 individual influencing factors. In addition we included the respective outcome as covariate (screen  
16 time as covariate for physical activity and vice versa). The same procedure was performed for neigh-  
17 bourhood SES. Afterwards we added in two steps the environmental factors 'school type' and  
18 'schools' neighbourhood SES'. All p-values are considered exploratory (with no adjustment for multi-  
19 ple testing). Analyses were performed using the software package SAS release 9.3 and 9.4 (SAS Insti-  
20 tute Inc., Cary, NC, USA).  
21  
22  
23  
24  
25  
26  
27  
28  
29  
30  
31

## 32 33 **RESULTS**

### 34 35 **Characteristics of the study population**

36  
37  
38 Out of 214 contacted schools, 49 schools (23%; 4291 students) showed interest and were eligible for  
39 study participation. Before baseline assessment, 1268 out of these 4291 students dropped out including  
40 two entire schools. 2801 students participated at the baseline assessment. Out of those, we included  
41 2586 students aged 12 and 13 years in our analysis. Figure 1 shows the recruitment process of the  
42 schools, classes and students.  
43  
44  
45  
46  
47

48 Sociodemographic baseline characteristics of all participating students are presented in Table 1a, the  
49 characteristics of the schools are presented in Table 1b. The mean ( $\pm$ SD) age of participants was 12.5  
50  $\pm$  0.5 years and the distribution between girls and boys was similar (50.5% vs. 49.5%). Of the entire  
51 sample, 34.1% were defined as having a migrant background.  
52  
53  
54  
55

56 Of the total sample, 12.8% fulfilled the WHO criteria being active for at least 60 minutes per day. The  
57 proportion of boys fulfilling the criteria was higher than in girls (15.9% of the boys vs. 9.8% of the  
58  
59  
60

girls, OR 1.7 [1.4;2.2];  $p < 0.001$ ) and boys were more active outside school than girls ( $0.9 \pm 0.8$  versus  $0.6 \pm 0.6$  hours per day, mean difference 0.3 hours [0.2;0.3],  $p < 0.001$ ). More than 80% of the boys and almost two thirds of the girls reported more than 2 hours ST per day, OR 2.2 [1.8;2.6];  $p < 0.001$ . Screen time on weekend days was higher than on week days among all students ( $5.7 \pm 3.6$  versus  $3.5 \pm 2.7$ ) (Table 1c).

**Table 1a: Characteristics of the study sample**

| Individual level                                                      | Boys                                        | Girls           | Total           | p-value |
|-----------------------------------------------------------------------|---------------------------------------------|-----------------|-----------------|---------|
|                                                                       | Mean $\pm$ Standard Deviation (SD) or n (%) |                 |                 |         |
| Number of students, n (%)                                             | 1279 (49.5)                                 | 1307 (50.5)     | 2586            |         |
| Age (years, mean $\pm$ SD) (n=2586)                                   | 12.5 $\pm$ 0.5                              | 12.4 $\pm$ 0.5  | 12.4 $\pm$ 0.5  | <0.001  |
| 12 years, n (%)                                                       | 651 (50.9)                                  | 775 (59.3)      | 1426 (55.1)     | <0.001  |
| 13 years, n (%)                                                       | 628 (49.1)                                  | 532 (40.7)      | 1160 (44.9)     |         |
| Height (cm, mean $\pm$ SD) (n=2440)                                   | 161.1 $\pm$ 9.5                             | 160.1 $\pm$ 7.3 | 160.6 $\pm$ 8.4 | 0.003   |
| Weight (kg, mean $\pm$ SD) (n=2360)                                   | 49.5 $\pm$ 10.9                             | 47.0 $\pm$ 8.9  | 48.3 $\pm$ 10.0 | <0.001  |
| BMI* (kg/m <sup>2</sup> , mean $\pm$ SD) (n=2296)                     | 18.9 $\pm$ 3.1                              | 18.3 $\pm$ 2.7  | 18.6 $\pm$ 2.9  | <0.001  |
| BMI range                                                             | 11.8 – 30.9                                 | 11.7 – 33.8     | 11.7 – 33.8     |         |
| Underweight (BMI <10 <sup>th</sup> percentile)**                      | 126 (11.1)                                  | 218 (18.8)      | 344 (15.0)      | <0.001  |
| Normal weight (BMI 10 <sup>th</sup> - <90 <sup>th</sup> percentile)** | 822 (72.2)                                  | 843 (72.6)      | 1665 (72.4)     |         |
| Overweight (BMI 90 <sup>th</sup> - <97 <sup>th</sup> percentile)**    | 166 (14.6)                                  | 90 (7.8)        | 256 (11.1)      |         |
| Obesity (BMI $\geq$ 97 <sup>th</sup> percentile)**                    | 24 (2.1)                                    | 10 (0.9)        | 34 (1.5)        |         |
| Migrant background (n=2423)                                           | 396 (33.1)                                  | 429 (35.0)      | 825 (34.0)      | 0.307   |
| Individual SES*** (family affluence scale; FAS) (n=2139)              |                                             |                 |                 |         |
| high (FAS 6-7)                                                        | 569 (53.7)                                  | 500 (46.3)      | 1069 (50.0)     | 0.003   |
| moderate (FAS 4-5)                                                    | 371 (35.0)                                  | 441 (40.9)      | 812 (38.0)      |         |
| low (FAS 0-3)                                                         | 120 (11.3)                                  | 138 (12.8)      | 258 (12.1)      |         |
| Student's neighbourhood SES (n=2240)                                  | 1114                                        | 1126            | 2240            |         |
| Mean $\pm$ SD                                                         | 4.0 $\pm$ 1.9                               | 4.1 $\pm$ 1.9   | 4.0 $\pm$ 1.9   | 0.526   |
| 1 (best)                                                              | 127 (11.4)                                  | 123 (10.9)      | 250 (11.2)      |         |
| 2                                                                     | 182 (16.3)                                  | 194 (17.2)      | 376 (16.8)      |         |
| 3                                                                     | 143 (12.8)                                  | 119 (10.6)      | 262 (11.7)      |         |
| 4                                                                     | 215 (19.3)                                  | 229 (20.3)      | 444 (19.8)      |         |
| 5                                                                     | 162 (14.5)                                  | 160 (14.2)      | 322 (14.4)      |         |
| 6                                                                     | 134 (12.0)                                  | 134 (11.9)      | 268 (12.0)      |         |
| 7 (worst)                                                             | 151 (13.6)                                  | 167 (14.8)      | 318 (14.2)      |         |
| School type (n=2586)                                                  |                                             |                 |                 |         |



|                                                                |            |            |             |        |
|----------------------------------------------------------------|------------|------------|-------------|--------|
| High School <sup>a</sup> students (15 schools)                 | 507 (39.6) | 624 (47.7) | 1131 (43.7) | <0.001 |
| Integrated Secondary School <sup>b</sup> students (32 schools) | 772 (60.4) | 683 (52.3) | 1455 (56.3) |        |

(descriptive statistical methods)

\*Body Mass Index (kg/m<sup>2</sup>)

\*\* BMI percentiles according to Cole et al. (38,39)

\*\*\* Socioeconomic Status

<sup>a</sup> High schools (5<sup>th</sup> or 7<sup>th</sup> grade to 12<sup>th</sup> grade, graduation with high school diploma after 12<sup>th</sup> grade)

<sup>b</sup> Integrated secondary schools (integration of different school types, 7<sup>th</sup> grade to 13<sup>th</sup> grade, graduation with secondary school leaving certificate after 10<sup>th</sup> grade or high school diploma after 13<sup>th</sup> grade)

**Table 1b: Characteristics of schools**

| School level                                           | High Schools <sup>a</sup> | Integrated Secondary Schools <sup>b</sup> | Total     |        |
|--------------------------------------------------------|---------------------------|-------------------------------------------|-----------|--------|
| Schools' neighbourhood SES, Mean±SD (n=47)             | 3.5±1.4                   | 3.2±1.6                                   | 4.0±1.8   | <0.001 |
| n (%)                                                  |                           |                                           |           |        |
| 1 (best)                                               | 1 (6.7)                   | 3 (9.4)                                   | 4 (8.5)   |        |
| 2                                                      | 4 (26.7)                  | 3 (9.4)                                   | 7 (14.9)  |        |
| 3                                                      | 2 (13.3)                  | 4 (12.5)                                  | 6 (12.8)  |        |
| 4                                                      | 4 (26.7)                  | 7 (21.9)                                  | 11 (23.4) |        |
| 5                                                      | 2 (13.3)                  | 4 (12.5)                                  | 6 (12.8)  |        |
| 6                                                      | 2 (13.3)                  | 5 (15.6)                                  | 6 (12.8)  |        |
| 7 (worst)                                              | 0 (0.0)                   | 6 (18.8)                                  | 6 (12.8)  |        |
| Student's neighbourhood SES*, Mean±SD (n=2240)         | 3.1±1.6                   | 4.6±1.9                                   |           | <0.001 |
| Individual SES* (family affluence scale; FAS) (n=2139) |                           |                                           |           |        |
| n (%)                                                  |                           |                                           |           |        |
| High (FAS 6-7)                                         | 744 (65.8)                | 531 (36.5)                                |           | <0.001 |
| Moderate (FAS 4-5)                                     | 338 (29.9)                | 652 (44.8)                                |           |        |
| Low (FAS 0-3)                                          | 49 (4.3)                  | 272 (18.7)                                |           |        |

(descriptive statistical methods)

SES: Socioeconomic Status, SD: Standard deviation

<sup>a</sup>High schools (5<sup>th</sup> or 7<sup>th</sup> grade to 12<sup>th</sup> grade, graduation with high school diploma after 12<sup>th</sup> grade)

<sup>b</sup>Integrated secondary schools (integration of different school types, 7<sup>th</sup> grade to 13<sup>th</sup> grade, graduation with secondary school leaving certificate after 10<sup>th</sup> grade or high school diploma after 13<sup>th</sup> grade)

**Table 1c. Comparison of boys and girls aged 12-13 years**

|                                                                          | Boys       | Girls      |                             | p-value<br>(boys<br>vs. girls) | Total      |
|--------------------------------------------------------------------------|------------|------------|-----------------------------|--------------------------------|------------|
|                                                                          | Proportion | Proportion | Odds ratio [95%<br>CI]      |                                | Proportion |
| WHO recommendations fulfilled: 60min/day every day per week (%) (n=2517) | 15.9       | 9.8        | 1.7 (1.4;2.2)               | <0.001                         | 12.8       |
| Screen time of 2 hours or more per day (%) (n=2503)                      | 81.5       | 66.9       | 2.2 (1.8;2.6)               | <0.001                         | 74.1       |
|                                                                          | Mean±SD    | Mean±SD    | Mean difference<br>[95% CI] | p-value                        | Mean±SD    |
| Time spent with physical activity per day (hours, mean±SD) (n=2517)      | 0.9±0.8    | 0.6±0.6    | 0.3 (0.2;0.3)               | <0.001                         | 0.8±0.7    |
| behaviourScreen time (TV) (hours, mean±SD)                               |            |            |                             |                                |            |
| school day (n=2555)                                                      | 2.2 ± 1.8  | 1.9 ± 1.6  | 0.3 (0.2;0.4)               | <0.001                         | 2.0 ± 1.7  |
| weekend day (n=2550)                                                     | 3.4 ± 2.0  | 2.9 ± 2.0  | 0.4 (0.3;0.6)               | <0.001                         | 3.1 ± 2.0  |
| behaviourScreen time (Computer) (hours, mean±SD)                         |            |            |                             |                                |            |
| school day (n=2558)                                                      | 1.8 ± 1.8  | 1.3 ± 1.6  | 0.5 (0.4;0.7)               | <0.001                         | 1.5 ± 1.7  |
| weekend day (n=2541)                                                     | 3.1 ± 2.2  | 2.0 ± 2.0  | 1.1 (1.0;1.3)               | <0.001                         | 2.6 ± 2.2  |
| Overall behaviourscreen time (hours, mean±SD) (n=)                       |            |            |                             |                                |            |
| school day (n=2536)                                                      | 3.9 ± 2.7  | 3.1 ± 2.5  | 0.8 (0.6;0.97)              | <0.001                         | 3.5 ± 2.7  |
| weekend day (n=2518)                                                     | 6.5 ± 3.6  | 4.9 ± 3.4  | 1.6 (1.3;1.8)               | <0.001                         | 5.7 ± 3.6  |

(descriptive statistical methods)

SD: Standard deviation, CI: Confidence interval

### Association of individual and neighbourhood SES with PA and ST

In model 1 of the multivariable analysis we included the individual SES with and without adjustment for sex, BMI, migration background and the respective outcome.

In model 2, we performed an analogous analysis for the student's neighbourhood SES. In model 3a we included individual and neighbourhood SES and the adjustment variables mentioned above. We then included stepwise "school type" (model 3b) and schools' neighbourhood SES (model 3c).

Physical activity was not associated with the individual SES, however, students with a low neighbourhood SES had a higher Odds (1.67 [1.14;2.44]; p=0.028) of spending at least 60 minutes per day being physically active compared to students with a high neighbourhood SES.

1  
2  
3 If both types of SES were included in the model (model 3), this association was no longer statistically  
4 significant. Adding school type and schools' neighbourhood SES did not change that. Sex, BMI and  
5 school type were statistically significantly associated with physical activity (Figure 2; suppl. table 1).

6  
7  
8  
9 Screen time, was associated with individual SES in all models. The lower the students' SES the higher  
10 the Odds to spend more than two hours of ST per day (1.25 [0.95; 1.64] and

11  
12 1.88 [1.12; 3.14];  $p=0.036$  for middle and low individual SES, respectively, compared to high  
13 SES). The association with the neighbourhood SES showed the same trend. Students with lower neigh-  
14 bourhood SES were more likely to spend more than two hours of ST per day than students with a high  
15 neighbourhood SES. Again, after including school type and schools' neighbourhood SES (model 3b  
16 and 3c) the association was not statistically significant any more (Figure 3; suppl table 2).

17  
18 Boys had a higher odds to be active but at the same time they were also more likely to engage in high-  
19 er ST compared to girls. Higher BMI was associated with less activity and more screen time. We saw  
20 no association of screen time with physical activity (and vice versa). There was no interaction effect  
21 between gender and screen time regarding physical activity, nor between gender and physical activity  
22 regarding screen time (data not shown).

23  
24  
25  
26  
27  
28  
29  
30  
31  
32  
33 Students of the integrated secondary schools were more active but reported also more screen time than  
34 high school students. Schools' neighbourhood SES had no effect on physical activity nor on screen  
35 time.  
36  
37  
38  
39  
40  
41  
42  
43  
44  
45  
46  
47  
48  
49  
50  
51  
52  
53  
54  
55  
56  
57  
58  
59  
60

## DISCUSSION

In this study we investigated the association of individual and neighbourhood SES with physical activity and screen time among school students. The individual SES of the students in our study sample, measured with the family affluence scale, was significantly associated with screen time. Students with lower SES were more likely to spend more than 2 hours per day viewing screen devices. Low SES was stronger associated with screen time than middle SES, compared to high SES. Physical activity, however, was not associated with the individual SES. This is in line with other studies which showed that the individual SES is not a strong predictor of high PA among youths(40–42). A possible explanation for these results is that PA consists not only of organised sports or activities that require a club membership. A large part of PA among youths are daily life activities and are based on activities in the neighbourhood and in parks which is independent from the individual SES(43). Another aspect of our study was the investigation of the neighbourhood SES as an influencing factor of physical activity and screen time. In contrast to the individual SES, an association was found for physical and screen time. After including school type, the association remained statistically significant only for screen time. Probably there was some interaction between the student's neighbourhood SES and the school type, which is quite probable since there are more integrated secondary schools in neighbourhoods with lower SES than high schools. Also, it is known, that the neighbourhood SES as well as the SES of the students is often correlated with the school type (44). In one previous study also using the social index for Berlin, an association of a lower neighbourhood SES with a higher BMI in 5-6 years old children living in Berlin was observed. However, the authors did not include health behaviours like physical activity or sedentary time in their analyses(45).

It is possible that other factors like the built environment play a more important role than individual or neighbourhood SES as factors influencing physical activity. Sallis et al. have shown in a study among adults, that the number of public transport stops, residential density, intersection density and the number of parks were independently and positively associated with the time spent in physical activity(46). Other authors also found associations of the built environment and physical activity(24). In another study associations appeared to differ between population groups (persons with low neighbourhood SES had a bigger benefit of a good walkability than those with a high neighbourhood SES)(23). Future

1  
2  
3 research should include measurement of the built environment in Berlin to provide new insights into  
4 the associations with physical activity.

5  
6  
7 In another previous study unemployment rate and overcrowding were used as indicators of neighbour-  
8 hood SES. The authors found a correlation between the unemployment rate and low physical activity  
9 in different urban districts in Germany and the Czech republic defining low physical activity as being  
10 active less than once a week which is a very broad definition(20).

11  
12  
13 A study from Switzerland reported different settings while engaging in physical activity and sedentary  
14 behaviour among children of low and high neighbourhood SES, whereas the overall time spent active  
15 or sedentary did not differ substantially between the two groups(21).

16  
17  
18 In the present study, the association of individual and neighbourhood SES with screen time is more  
19 consistent than the association with physical activity. For future health promotion programs different  
20 school types may need to be taken into account in addition to differences in SES. In this study, stu-  
21 dents of integrated secondary schools spent more time viewing screen devices, but were also more  
22 active than high school students. This is in contrast to another study from Germany, where high school  
23 students were more likely to achieve a healthier lifestyle, including regular physical activity than stu-  
24 dents from other school types(13). According to our study results, integrated secondary school stu-  
25 dents could benefit by interventions which promotes alternatives to screen time, whereas high school  
26 students seem to need physical activity promotion.

27  
28  
29 In contrast to the study by Lampert et al., there was no association of students' migration background  
30 and physical activity in our study(47).

### 31 32 33 **Strengths and limitations**

34  
35  
36 Strengths of our study include the size of our sample, as well as the proportion of students with migra-  
37 tion background, socioeconomic status and gender distribution, which appear to be very similar to the  
38 student population of Berlin(48). However, the results are only valid for regions with similar charac-  
39 teristics as Berlin: an urban region with high walkability and good infrastructure for transportation and  
40 cycling.

1  
2  
3 Some limitations have to be considered as well. First, FAS was only assessed at the 24 month follow  
4 up. However, we assessed one item of the FAS (holiday) both at baseline and at the 12 month follow-  
5 up. The answers were quite similar over the two years. We thus think the period of two years impli-  
6 cates only minimal changes in the FAS level. Anthropometric data and physical activity were not  
7 measured objectively. Self-report may lead to distorted results through misreporting(49). However,  
8 children and adolescents seem to be reliable in providing accurate and valid information as long as the  
9 questionnaires are developed for the respective age group, which was the case(50). Another limitation  
10 is that as screen time measures, only the use of TV, Computer and video games was assessed by the  
11 applied HBSC questionnaire. Other kinds of devices (smartphones, tablets) and other kinds of seden-  
12 tary behaviours like sitting during homework, talking on the phone and sitting at school were not taken  
13 into account, which may have led to an underestimation of the screen time.  
14  
15  
16  
17  
18  
19  
20  
21  
22  
23  
24  
25  
26

## 27 **CONCLUSION**

28  
29 Lower individual and neighbourhood SES were independently associated with higher screen time in  
30 students. Physical activity was not associated with the individual SES, but with neighborhood SES.  
31 Both, individual and neighbourhood SES as well as school type are important factors that have to be  
32 considered, when developing prevention programs for school students. Future research should include  
33 measurement of the built environment in Berlin to provide new insights into associations with physical  
34 activity.  
35  
36  
37  
38  
39  
40  
41  
42  
43

## 44 **ACKNOWLEDGEMENTS**

45  
46 The authors thank the Berlin City Council (Senatsverwaltung für Bildung, Jugend und Wissenschaft,  
47 Berlin) and the participating schools, teachers and students for supporting the project.  
48  
49  
50  
51

## 52 **CONTRIBUTORS**

53  
54 LK and FMR drafted the manuscript with intellectual input from SR, NR, JMN, and NSB. FMR su-  
55 pervised the study and LK carried out the data collection and parts of the data analysis. FL and SR  
56  
57  
58  
59  
60

1  
2  
3 were responsible for data assessment and statistical analyses, FMR, CB, NR, JMN and NSB were re-  
4 sponsible for the design of the recruitment methods and the assessment tools, FMR, NR, JMN, and  
5 SW conceptualized the study. All authors read and approved the final manuscript.  
6  
7

## 8 9 10 **FUNDING**

11  
12 This work was supported by ‘The German Cancer Aid (Deutsche Krebshilfe e.V.)’.

## 13 14 **COMPETING INTERESTS**

15  
16  
17 None declared.

## 18 19 **ETHICS APPROVAL**

20  
21 The study was approved by the ethical review committee of the Charité-Universitätsmedizin Berlin,  
22 Germany.  
23

## 24 25 **DATA SHARING STATEMENT**

26  
27 No additional data available.  
28  
29  
30  
31  
32  
33  
34  
35  
36  
37  
38  
39  
40  
41  
42  
43  
44  
45  
46  
47  
48  
49  
50  
51  
52  
53  
54  
55  
56  
57  
58  
59  
60

## REFERENCES

1. WHO. Global health risks. 2009.
2. Ferreira de Moraes AC, Carvalho HB, Siani A, Barba G, Veidebaum T, Tornaritis M, et al. Incidence of high blood pressure in children - Effects of physical activity and sedentary behaviors: The IDEFICS study: High blood pressure, lifestyle and children. *Int J Cardiol*. Elsevier Ireland Ltd; 2014 Nov 26;180C:165–70.
3. Danielsen YS, Júlíusson PB, Nordhus IH, Kleiven M, Meltzer HM, Olsson SJG, et al. The relationship between life-style and cardio-metabolic risk indicators in children: the importance of screen time. *Acta Paediatr*. 2011 Feb;100(2):253–9.
4. Santaliestra-Pasías AM, Mouratidou T, Verbestel V, Bammann K, Molnar D, Sieri S, et al. Physical activity and sedentary behaviour in European children: the IDEFICS study. *Public Health Nutr*. 2013 Oct 8;(4):1–12.
5. Manz K, Schlack R, Poethko-Müller C, Mensink G, Finger J, Lampert T. Physical activity and electronic media use in children and adolescents: results of the KiGGS study: first follow-up (KiGGS wave 1). *Bundesgesundheitsblatt Gesundheitsforschung Gesundheitsschutz*. 2014 Jul;57(7):840–8.
6. Verloigne M, Van Lippevelde W, Maes L, Yildirim M, Chinapaw M, Manios Y, et al. Self-reported TV and computer time do not represent accelerometer-derived total sedentary time in 10 to 12-year-olds. *Eur J Public Health*. 2013;23(1):30–2.
7. Currie C, Gabhainn A, Godeau E, Roberts C, Smith R, Currie D, et al. Health Policy for Children and Adolescents, No. 5 - Inequalities in Young People's Health. 2006.
8. Gorely T, Marshall SJ, Biddle SJH, Cameron N. Patterns of sedentary behaviour and physical activity among adolescents in the United Kingdom: Project STIL. *J Behav Med*. 2007;30(6):521–31.
9. Bringolf-Isler B, Mäder U, Dössegger A, Hofmann H, Puder JJ, Braun-Fahrländer C, et al. Regional differences of physical activity and sedentary behaviour in Swiss children are not explained by socio-demographics or the built environment. *Int J Public Health*. 2015;60(3):291–300.



10. Gorely T, Atkin AJ, Biddle SJ, Marshall SJ. Family circumstance, sedentary behaviour and physical activity in adolescents living in England: Project STIL. *Int J Behav Nutr Phys Act.* 2009;6:33.
11. Stone MR, Faulkner GE, Mitra R, Buliung RN. The freedom to explore: examining the influence of independent mobility on weekday, weekend and after-school physical activity behaviour in children living in urban and inner-suburban neighbourhoods of varying socioeconomic status. *Int J Behav Nutr Phys Act.* 2014 Jan;11:5.
12. Kurth B-M, Schaffrath Rosario A. The prevalence of overweight and obese children and adolescents living in Germany. Results of the German Health Interview and Examination Survey for Children and Adolescents (KiGGS). *Bundesgesundheitsblatt Gesundheitsforschung Gesundheitsschutz.* 2007;50:736–43.
13. Kuntz B, Lampert T. How healthy is the lifestyle of adolescents in Germany? *Gesundheitswesen.* 2013;75:67–76.
14. Gose M, Plachta-Danielzik S, Willié B, Johannsen M, Landsberg B, Müller MJ. Longitudinal influences of neighbourhood built and social environment on children's weight status. *Int J Environ Res Public Health.* 2013;10(10):5083–96.
15. Suglia SF, Shelton RC, Hsiao A, Wang YC, Rundle A, Link BG. Why the Neighborhood Social Environment Is Critical in Obesity Prevention. *J Urban Heal.* 2016;93(1):206–12.
16. Mitchell CA, Clark AF, Gilliland JA. Built Environment Influences of Children's Physical Activity: Examining Differences by Neighbourhood Size and Sex. *Int J Environ Res Public Health.* 2016;13(1).
17. McNeill LH, Kreuter MW, Subramanian S V. Social Environment and Physical activity: A review of concepts and evidence. *Soc Sci Med.* 2006;63(4):1011–22.
18. Ross CE, Mirowsky J. Neighborhood Disadvantage, Disorder, and Health. *J Health Soc Behav.* 2001;42(3):258–76.
19. Cubbin C, Hadden WC, Winkleby MA. Neighborhood Context and Cardiovascular Disease Risk Factors: The Contribution of Material Deprivation. *Ethnicity&Disease.* 2001;11:687–700.
20. Dragano N, Bobak M, Wege N, Peasey A, Verde PE, Kubinova R, et al. Neighbourhood

- 1  
2  
3 socioeconomic status and cardiovascular risk factors: a multilevel analysis of nine cities in the  
4  
5 Czech Republic and Germany. *BMC Public Health*. 2007;7:255.
- 6  
7 21. Bürgi R, Tomatis L, Murer K, de Bruin ED. Spatial physical activity patterns among primary  
8  
9 school children living in neighbourhoods of varying socioeconomic status: a cross-sectional  
10  
11 study using accelerometry and Global Positioning System. *BMC Public Health*. *BMC Public*  
12  
13 *Health*; 2016;16(1):282.
- 14  
15 22. Kavanagh AM, Goller JL, King T, Jolley D, Crawford D, Turrell G. Urban area disadvantage  
16  
17 and physical activity: a multilevel study in Melbourne, Australia. *J Epidemiol Community*  
18  
19 *Health*. 2005;59(11):934–40.
- 20  
21 23. De Meester F, Van Dyck D, De Bourdeaudhuij I, Deforche B, Sallis JF, Cardon G. Active  
22  
23 living neighborhoods: is neighborhood walkability a key element for Belgian adolescents?  
24  
25 *BMC Public Health* [Internet]. BioMed Central Ltd; 2012;12(1):7. Available from:  
26  
27 <http://bmcpublikealth.biomedcentral.com/articles/10.1186/1471-2458-12-7>
- 28  
29 24. Bringolf-Isler B, Kriemler S, Mäder U, Dössegger A, Hofmann H, Puder JJ, et al. Relationship  
30  
31 between the objectively-assessed neighborhood area and activity behavior in Swiss youth. *Prev*  
32  
33 *Med Reports* [Internet]. Elsevier B.V.; 2014;1:14–20. Available from:  
34  
35 <http://dx.doi.org/10.1016/j.pmedr.2014.09.001>
- 36  
37 25. Krist L, Lotz F, Bürger C, Ströbele-Benschop N, Roll S, Rieckmann N, et al. Long-term  
38  
39 effectiveness of a combined student-parent and a student-only smoking prevention intervention  
40  
41 among 7th grade school children in Berlin, Germany. *Addiction*. 2016;111(12):2219–29.
- 42  
43 26. Müller-Riemenschneider F, Krist L, Bürger C, Ströbele-Benschop N, Roll S, Rieckmann N, et  
44  
45 al. Berlin evaluates school tobacco prevention - BEST prevention: study design and  
46  
47 methodology. *BMC Public Health*. 2014 Jan;14(1):871.
- 48  
49 27. Ottova V, Hillebrandt D, Kolip P, Hoffarth K, Bucksch J, Melzer W, et al. The HBSC Study in  
50  
51 Germany – Study Design and Methodology. *Gesundheitswesen*. 2012;74(Suppl 1):S8-14.
- 52  
53 28. Opper E, Worth A, Wagner M, Bös K. The module „Motorik“ in the German Health Interview  
54  
55 and Examination Survey for Children and Adolescents (KiGGS). *Motor Fitness and physical*  
56  
57 *activity of children and young people*. *Bundesgesundheitsblatt Gesundheitsforschung*  
58  
59

- 1  
2  
3  
4  
5  
6  
7  
8  
9  
10  
11  
12  
13  
14  
15  
16  
17  
18  
19  
20  
21  
22  
23  
24  
25  
26  
27  
28  
29  
30  
31  
32  
33  
34  
35  
36  
37  
38  
39  
40  
41  
42  
43  
44  
45  
46  
47  
48  
49  
50  
51  
52  
53  
54  
55  
56  
57  
58  
59  
60
- Gesundheitsschutz. 2007;50:879–88.
29. WHO. Global Recommendations on Physical Activity for Health. 2010 p. 60.
30. American Academy of Pediatrics. Children, Adolescents, and Television. *Pediatrics*. 2001 Feb 1;107(2):423–6.
31. Cole TJ, Flegal KM, Nicholls D, Jackson A a. Body mass index cut offs to define thinness in children and adolescents: international survey. *BMJ*. 2007 Jul 28;335(7612):194.
32. Cole TJ, Bellizzi MC, Flegal KM, Dietz WH. Establishing a standard definition for child overweight and obesity worldwide: international survey. *BMJ*. 2000;320:1240.
33. Bundesministerium der Justiz. Verordnung zur Erhebung der Merkmale des Migrationshintergrundes (Migrationshintergrund- Erhebungsverordnung - MighEV ). 2010.
34. Currie CE, Elton RA, Todd J, Platt S. Indicators of socioeconomic status for adolescents : the WHO Health Behaviour in School-aged Children Survey. *Health Educ Res*. 1997;12(3):385–97.
35. Senatsverwaltung für Gesundheit und Soziales. Handlungsorientierter Sozialstrukturatlas Berlin 2013. 2013.
36. Senatsverwaltung für Gesundheit Umwelt und Verbraucherschutz. Gesundheitsberichterstattung Berlin - Spezialbericht Sozialstrukturatlas Berlin 2008. 2008.
37. Institut für Schulqualität der Länder Berlin und Brandenburg. *Bildung in Berlin und Brandenburg 2010*. 2010.
38. Cole TJ, Bellizzi MC, Flegal KM, Dietz WH. Establishing a standard definition for child overweight and obesity worldwide: international survey. *BMJ*. 2000;320(1240):1–6.
39. Cole TJ, Flegal KM, Nicholls D, Jackson AA. Body mass index cut offs to define thinness in children and adolescents : international survey. *BMJ*. 2007;335(7612):194.
40. Bucksch J, Inchley J, Hamrik Z, Finne E, Kolip P. Trends in television time, non-gaming PC use and moderate-to-vigorous physical activity among German adolescents 2002–2010. *BMC Public Health*. 2014;14(351):1–10.
41. Finne E, Bucksch J, Lampert T, Kolip P. Age , puberty , body dissatisfaction , and physical activity decline in adolescents . Results of the German Health Interview and Examination

- 1  
2  
3 Survey ( KiGGS ). Int J Behav Nutr Phys Act [Internet]. BioMed Central Ltd; 2011;8(1):119.  
4 Available from: <http://www.ijbnpa.org/content/8/1/119>  
5  
6  
7 42. Jekauc D, Reimers AK, Wagner MO, Woll A. Prevalence and socio-demographic correlates of  
8 the compliance with the physical activity guidelines in children and adolescents in Germany.  
9 BMC Public Health. 2012;12(1):714.  
10  
11 43. Schott K, Hunger M, Spenger S, Mess F, Mielck A. Social Differences in Physical Activity  
12 among Adolescents in Germany: Analyses Based on Information Concerning the Metabolic  
13 Equivalent of Task (MET). Gesundheitswesen. 2015;[Epub ahead of print].  
14  
15 44. Robert Koch-Institut. Gesundheitsberichterstattung des Bundes. Vol. 21,  
16 Lebensphasenspezifische Gesundheit von Kindern und Jugendlichen in Deutschland -  
17 Ergebnisse des Nationalen Kinder- und Jugendgesundheits surveys (KiGGS). 2004.  
18  
19 45. Lakes T, Burkart K. Childhood overweight in Berlin: intra-urban differences and underlying  
20 influencing factors. Int J Health Geogr. BioMed Central; 2016;15(1):12.  
21  
22 46. Sallis JF, Cerin E, Conway TL, Adams MA, Frank LD, Pratt M, et al. Physical activity in  
23 relation to urban environments in 14 cities worldwide: A cross-sectional study. Lancet.  
24 2016;387(10034):2207–17.  
25  
26 47. Lampert T, Mensink G, Romahn N, Woll A. Physical activity among children and adolescents  
27 in Germany. Results of the German Health Interview and Examination Survey for Children and  
28 Adolescents (KiGGS). Bundesgesundheitsblatt Gesundheitsforschung Gesundheitsschutz.  
29 2007;50:634–42.  
30  
31 48. Senatsverwaltung für Gesundheit Umwelt und Verbraucherschutz. Grundausswertung der  
32 Einschulungsdaten in Berlin 2010. 2010.  
33  
34 49. Merrill RM, Richardson JS. Validity of Self-Reported Height, Weight, and Body Mass Index:  
35 Findings from the National Health and Nutrition Examination Survey, 2001-2006. Prev  
36 Chronic Dis. 2009;6(4):A121.  
37  
38 50. Riley AW. Evidence That School-Age Children Can Self-Report on Their Health. Ambul  
39 Pediatr. 2004;4(4):371.  
40  
41  
42  
43  
44  
45  
46  
47  
48  
49  
50  
51  
52  
53  
54  
55  
56  
57  
58  
59  
60

**Figures**

Figure 1. Flowchart of the recruitment process

Figure 2. Multivariable analysis of physical activity associated factors among 12 and 13 years old students

Figure 3. Multivariable analysis of screen time associated factors among 12 and 13 years old students

**Supplementary files**

Supplementary table 1. Multivariable analysis of physical activity associated factors among 12 and 13 years old students

Supplementary table 2. Multivariable analysis of screen time associated factors among 12 and 13 years old students.

1  
2  
3  
4  
5  
6  
7  
8  
9  
10  
11  
12  
13  
14  
15  
16  
17  
18  
19  
20  
21  
22  
23  
24  
25  
26  
27  
28  
29  
30  
31  
32  
33  
34  
35  
36  
37  
38  
39  
40  
41  
42  
43  
44  
45  
46  
47  
48  
49  
50  
51  
52  
53  
54  
55  
56  
57  
58  
59  
60

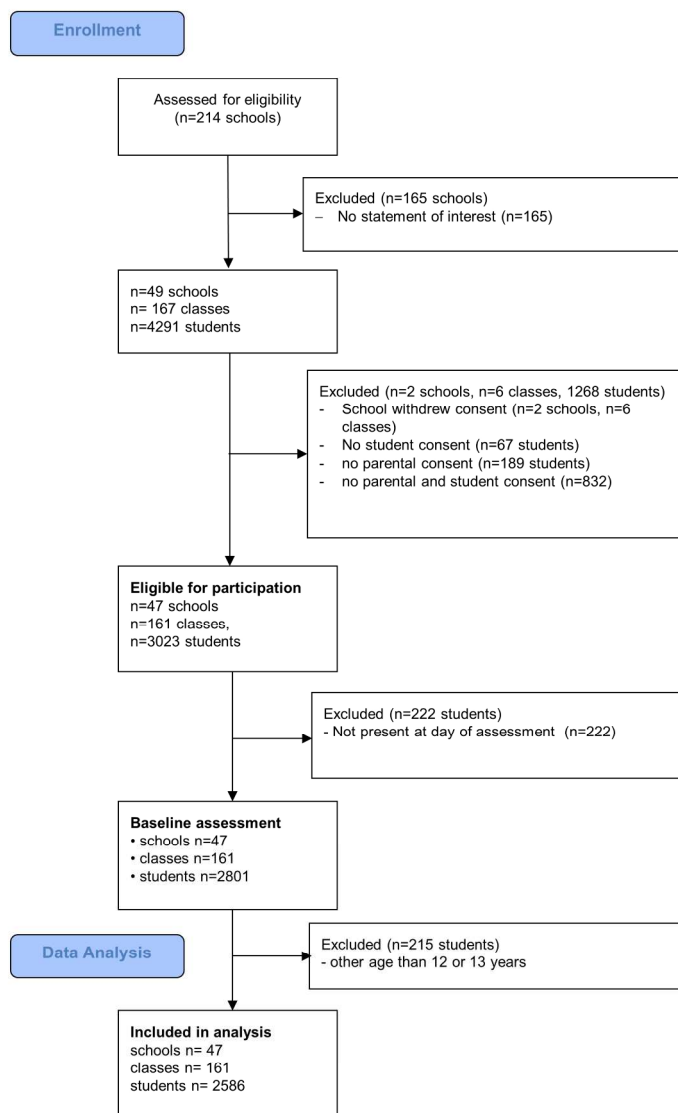

Flowchart of the recruitment process

254x338mm (300 x 300 DPI)

1  
2  
3  
4  
5  
6  
7  
8  
9  
10  
11  
12  
13  
14  
15  
16  
17  
18  
19  
20  
21  
22  
23  
24  
25  
26  
27  
28  
29  
30  
31  
32  
33  
34  
35  
36  
37  
38  
39  
40  
41  
42  
43  
44  
45  
46  
47  
48  
49  
50  
51  
52  
53  
54  
55  
56  
57  
58  
59  
60

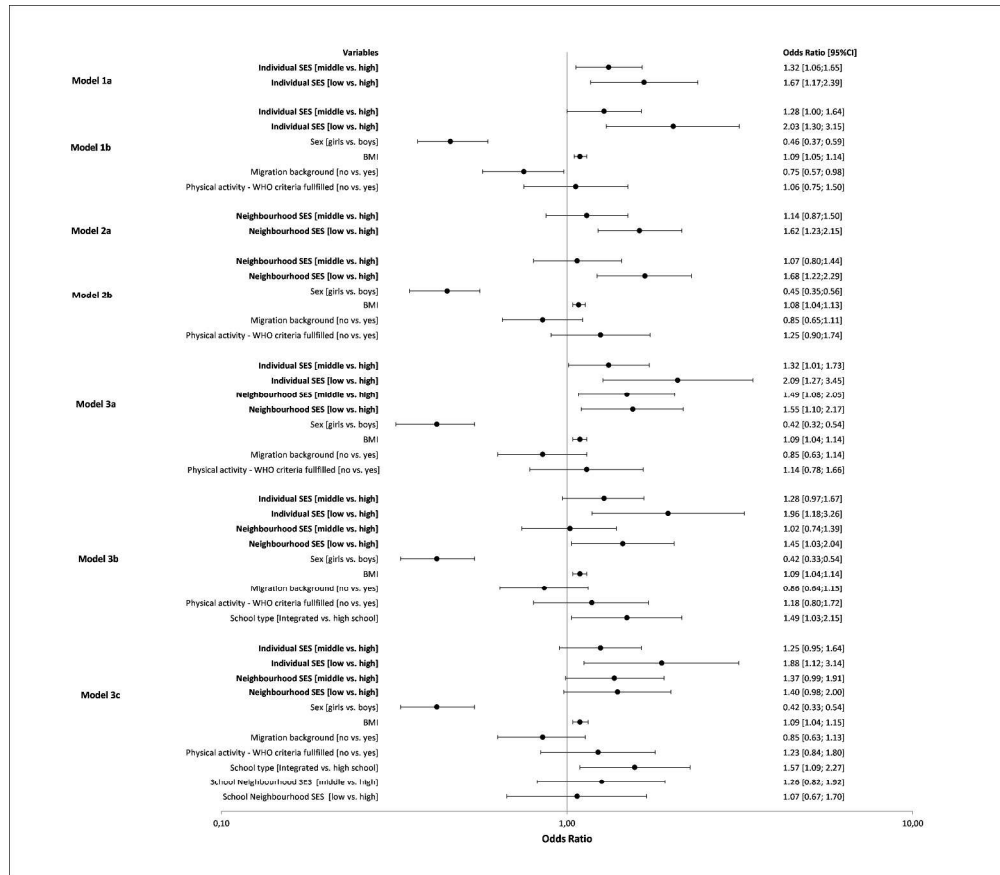

Multivariable analysis of screen time associated factors among 12 and 13 years old students

380x331mm (300 x 300 DPI)

only

Supplementary table 1: Multivariable analysis of physical activity associated factors among 12 and 13 years old students

| WHO criteria for physical activity (at least 60 minutes per day physically active) fulfilled: |                      |         |                      |                  |                     |         |                     |                  |                      |                  |                     |                  |                      |                  |
|-----------------------------------------------------------------------------------------------|----------------------|---------|----------------------|------------------|---------------------|---------|---------------------|------------------|----------------------|------------------|---------------------|------------------|----------------------|------------------|
|                                                                                               | Model 1*             |         |                      |                  | Model 2**           |         |                     |                  | Model 3***           |                  |                     |                  |                      |                  |
|                                                                                               | Model 1a (n=1926)    |         | Model 1b (n=1595)    |                  | Model 2a (n=2027)   |         | Model 2b (n=1652)   |                  | Model 3a (n=1381)    |                  | Model 3b (n=1381)   |                  | Model 3c (n=1364)    |                  |
|                                                                                               | OR<br>(95% CI)       | p-value | OR<br>(95% CI)       | p-value          | OR<br>(95% CI)      | p-value | OR<br>(95% CI)      | p-value          | OR<br>(95% CI)       | p-value          | OR<br>(95% CI)      | p-value          | OR<br>(95% CI)       | p-value          |
| <b>Individual socioeconomic status (FAS)</b>                                                  |                      | 0.640   |                      | 0.940            | -                   | -       | -                   | -                |                      | 0.763            |                     | 0.520            |                      | 0.476            |
| High                                                                                          | 1                    |         | 1                    |                  | -                   | -       | -                   | -                | 1                    |                  | 1                   |                  | 1                    |                  |
| Middle                                                                                        | 0.90<br>(0.67; 1.19) |         | 0.95<br>(0.69; 1.31) |                  | -                   | -       | -                   | -                | 0.89<br>(0.62; 1.26) |                  | 0.83<br>(0.58;1.19) |                  | 0.83<br>(0.58; 1.20) |                  |
| Low                                                                                           | 0.84<br>(0.53; 1.31) |         | 1.01<br>(0.60; 1.69) |                  | -                   | -       | -                   | -                | 0.87<br>(0.50; 1.54) |                  | 0.78<br>(0.44;1.38) |                  | 0.74<br>(0.41; 1.33) |                  |
| <b>Student's neighbourhood SES</b>                                                            | -                    | -       | -                    | -                |                     | 0.064   | -                   | <b>0.028</b>     |                      | 0.079            |                     | 0.301            |                      | 0.253            |
| High (rank 1-2)                                                                               | -                    | -       | -                    | -                | 1                   |         | 1                   |                  | 1                    |                  | 1                   |                  | 1                    |                  |
| Middle (rank 3-4)                                                                             | -                    | -       | -                    | -                | 1.19<br>(0.83;1.71) |         | 1.24<br>(0.84;1.84) |                  | 1.27<br>(0.85; 1.88) |                  | 1.20<br>(0.77;1.88) |                  | 1.19<br>(0.78; 1.82) |                  |
| Low (rank 5-7)                                                                                | -                    | -       | -                    | -                | 1.49<br>(1.06;2.11) |         | 1.67<br>(1.14;2.44) |                  | 1.65<br>(1.07; 2.56) |                  | 1.43<br>(0.91;2.24) |                  | 1.51<br>(0.93; 2.46) |                  |
| <b>Sex</b>                                                                                    | -                    | -       |                      | <b>&lt;0.001</b> | -                   | -       |                     | <b>&lt;0.001</b> |                      | <b>&lt;0.001</b> |                     | <b>&lt;0.001</b> |                      | <b>&lt;0.001</b> |
| Boys                                                                                          | -                    | -       | 1                    |                  | -                   | -       | 1                   |                  | 1                    |                  | 1                   |                  | 1                    |                  |
| Girls                                                                                         | -                    | -       | 0.51<br>(0.38; 0.69) |                  | -                   | -       | 0.48<br>(0.36;0.65) |                  | 0.48<br>(0.35; 0.67) |                  | 0.49<br>(0.35;0.69) |                  | 0.48<br>(0.34; 0.68) |                  |
| <b>BMI</b>                                                                                    | -                    | -       | 0.90<br>(0.85; 0.95) | <b>&lt;0.001</b> | -                   | -       | 0.92<br>(0.87;0.97) | <b>0.002</b>     | 0.92<br>(0.87; 0.98) | <b>0.006</b>     | 0.92<br>(0.86;0.97) | <b>0.003</b>     | 0.91<br>(0.86; 0.97) | <b>0.003</b>     |
| <b>Migration background</b>                                                                   | -                    | -       |                      | 0.844            | -                   | -       |                     | 0.957            |                      | 0.588            |                     | 0.621            |                      | 0.761            |
| yes                                                                                           | -                    | -       | 1                    |                  | -                   | -       | 1                   |                  | 1                    |                  | 1                   |                  | 1                    |                  |
| no                                                                                            | -                    | -       | 0.97<br>(0.69; 1.36) |                  | -                   | -       | 0.99<br>(0.72;1.36) |                  | 0.91<br>(0.63; 1.30) |                  | 0.91<br>(0.63;1.31) |                  | 0.94<br>(0.65; 1.37) |                  |
| <b>Screen time</b>                                                                            | -                    | -       |                      | 0.734            | -                   | -       |                     | 0.165            | -                    | 0.425            |                     | 0.352            |                      | 0.233            |
| ≥2 hours                                                                                      | -                    | -       | 1                    |                  | -                   | -       | 1                   |                  | 1                    |                  | 1                   |                  | 1                    |                  |
| <2 hours                                                                                      | -                    | -       | 1.06<br>(0.76; 1.49) |                  | -                   | -       | 1.26<br>(0.91;1.74) |                  | 1.16<br>(0.81; 1.67) |                  | 1.20<br>(0.82;1.75) |                  | 1.26<br>(0.86; 1.86) |                  |
| <b>School type</b>                                                                            | -                    | -       | -                    | -                | -                   | -       | -                   | -                | -                    | -                |                     | <b>0.006</b>     |                      | <b>0.002</b>     |
| High School                                                                                   | -                    | -       | -                    | -                | -                   | -       | -                   | -                | -                    | -                | 1                   |                  | 1                    |                  |
| Integrated Secondary School                                                                   | -                    | -       | -                    | -                | -                   | -       | -                   | -                | -                    | -                | 1.93<br>(1.21;3.07) |                  | 2.15<br>(1.34; 3.47) |                  |
| <b>Schools' neighbourhood SES</b>                                                             | -                    | -       | -                    | -                | -                   | -       | -                   | -                | -                    | -                |                     |                  |                      | 0.723            |
| High (rank 1-2)                                                                               | -                    | -       | -                    | -                | -                   | -       | -                   | -                | -                    | -                | -                   |                  | 1                    |                  |
| Middle (rank 3-4)                                                                             | -                    | -       | -                    | -                | -                   | -       | -                   | -                | -                    | -                | -                   |                  | 1.15<br>(0.69; 1.92) |                  |
| Low (rank 5-7)                                                                                | -                    | -       | -                    | -                | -                   | -       | -                   | -                | -                    | -                | -                   |                  | 0.92<br>(0.52; 1.62) |                  |

\*Model 1 (Model 1a: individual socioeconomic status (FAS), Model 1b: individual socioeconomic status (FAS) adjusted for Sex, BMI, migration background, screen time)

\*\*Model 2 (Model 2a: student's neighbourhood SES (3 categories); Model 2b: student's neighbourhood SES (3 categories) adjusted for Sex, BMI, migration background, screen time)

\*\*\*Model 3 (Model 3a: Model 1+2, Model 3b: Model 1+2+School type, Model 3c: Model 1+2+School type+School neighbourhood SES)

For peer review only - <http://bmjopen.bmj.com/site/about/guidelines.xhtml>



Supplementary table 2: Multivariable analysis of screen time associated factors among 12 and 13 years old students

|                                                            | Model 1*            |              |                      |                  | Model 2**           |              |                     |                  | Model 3***           |                  |                     |                  |                      |                  |
|------------------------------------------------------------|---------------------|--------------|----------------------|------------------|---------------------|--------------|---------------------|------------------|----------------------|------------------|---------------------|------------------|----------------------|------------------|
|                                                            | Model 1a (n=1925)   |              | Model 1b (n=1595)    |                  | Model 2a (n=2014)   |              | Model 2b (n=1652)   |                  | Model 3a (n=1381)    |                  | Model 3b (n=1381)   |                  | Model 3c (n=1364)    |                  |
|                                                            | OR<br>(95% CI)      | p-value      | OR<br>(95% CI)       | p-value          | OR<br>(95% CI)      | p-value      | OR<br>(95% CI)      | p-value          | OR<br>(95% CI)       | p-value          | OR<br>(95% CI)      | p-value          | OR<br>(95% CI)       | p-value          |
| <b>Individual SES (FAS)</b>                                |                     | <b>0.005</b> |                      | <b>0.004</b>     | -                   | -            | -                   | -                |                      | <b>0.007</b>     |                     | <b>0.019</b>     |                      | <b>0.036</b>     |
| High                                                       | 1                   |              | 1                    |                  | -                   | -            | -                   | -                | 1                    |                  | 1                   |                  | 1                    |                  |
| Middle                                                     | 1.32<br>(1.06;1.65) |              | 1.28<br>(1.00; 1.64) |                  | -                   | -            | -                   | -                | 1.32<br>(1.01; 1.73) |                  | 1.28<br>(0.97;1.67) |                  | 1.25<br>(0.95; 1.64) |                  |
| Low                                                        | 1.67<br>(1.17;2.39) |              | 2.03<br>(1.30; 3.15) |                  | -                   | -            | -                   | -                | 2.09<br>(1.27; 3.45) |                  | 1.96<br>(1.18;3.26) |                  | 1.88<br>(1.12; 3.14) |                  |
| <b>Student's neighbourhood SES</b>                         | -                   | -            | -                    | -                |                     | <b>0.005</b> |                     | <b>0.002</b>     |                      | <b>0.019</b>     |                     | 0.057            |                      | 0.109            |
| High (rank 1-2)                                            | -                   | -            | -                    | -                | 1                   |              | 1                   |                  | 1                    |                  | 1                   |                  | 1                    |                  |
| Middle (rank 3-4)                                          | -                   | -            | -                    | -                | 1.14<br>(0.87;1.50) |              | 1.07<br>(0.80;1.44) |                  | 1.49<br>(1.08; 2.05) |                  | 1.02<br>(0.74;1.39) |                  | 1.37<br>(0.99; 1.91) |                  |
| Low (rank 5-7)                                             | -                   | -            | -                    | -                | 1.62<br>(1.23;2.15) |              | 1.68<br>(1.22;2.29) |                  | 1.55<br>(1.10; 2.17) |                  | 1.45<br>(1.03;2.04) |                  | 1.40<br>(0.98; 2.00) |                  |
| <b>Sex</b>                                                 | -                   | -            | -                    | <b>&lt;0.001</b> | -                   | -            | -                   | -                | -                    | <b>&lt;0.001</b> | -                   | <b>&lt;0.001</b> | -                    | <b>&lt;0.001</b> |
| Boys                                                       | -                   | -            | 1                    |                  | -                   | -            | 1                   | <b>&lt;0.001</b> | 1                    |                  | 1                   |                  | 1                    |                  |
| Girls                                                      | -                   | -            | 0.46<br>(0.37; 0.59) |                  | -                   | -            | 0.45<br>(0.35;0.56) |                  | 0.42<br>(0.32; 0.54) |                  | 0.42<br>(0.33;0.54) |                  | 0.42<br>(0.33; 0.54) |                  |
| <b>BMI</b>                                                 | -                   | -            | 1.09<br>(1.05; 1.14) | <b>&lt;0.001</b> | -                   | -            | 1.08<br>(1.04;1.13) | <b>&lt;0.001</b> | 1.09<br>(1.04; 1.14) | <b>&lt;0.001</b> | 1.09<br>(1.04;1.14) | <b>&lt;0.001</b> | 1.09<br>(1.04; 1.15) | <b>&lt;0.001</b> |
| <b>Migration background</b>                                | -                   | -            | -                    | <b>0.035</b>     | -                   | -            | -                   | 0.223            | -                    | 0.267            | -                   | 0.293            | -                    | 0.262            |
| yes                                                        | -                   | -            | 1                    |                  | -                   | -            | 1                   |                  | 1                    |                  | 1                   |                  | 1                    |                  |
| no                                                         | -                   | -            | 0.75<br>(0.57; 0.98) |                  | -                   | -            | 0.85<br>(0.65;1.11) |                  | 0.85<br>(0.63; 1.14) |                  | 0.86<br>(0.64;1.15) |                  | 0.85<br>(0.63; 1.13) |                  |
| <b>Physical activity (PA)<br/>(WHO criteria fulfilled)</b> | -                   | -            | -                    | 0.738            | -                   | -            | -                   | 0.189            | -                    | 0.510            | -                   | 0.404            | -                    | 0.297            |
| Yes                                                        | -                   | -            | 1                    |                  | -                   | -            | 1                   |                  | 1                    |                  | 1                   |                  | 1                    |                  |
| No                                                         | -                   | -            | 1.06<br>(0.75; 1.50) |                  | -                   | -            | 1.25<br>(0.90;1.74) |                  | 1.14<br>(0.78; 1.66) |                  | 1.18<br>(0.80;1.72) |                  | 1.23<br>(0.84; 1.80) |                  |
| <b>School type</b>                                         | -                   | -            | -                    | -                | -                   | -            | -                   | -                | -                    | -                | -                   | <b>0.036</b>     | -                    | <b>0.016</b>     |
| High School                                                | -                   | -            | -                    | -                | -                   | -            | -                   | -                | -                    | -                | 1                   |                  | 1                    |                  |
| Integrated Secondary School                                | -                   | -            | -                    | -                | -                   | -            | -                   | -                | -                    | -                | 1.49<br>(1.03;2.15) |                  | 1.57<br>(1.09; 2.27) |                  |
| <b>Schools' neighbourhood SES</b>                          | -                   | -            | -                    | -                | -                   | -            | -                   | -                | -                    | -                | -                   | -                | -                    | 0.535            |
| High (rank 1-2)                                            | -                   | -            | -                    | -                | -                   | -            | -                   | -                | -                    | -                | -                   | -                | 1                    |                  |
| Middle (rank 3-4)                                          | -                   | -            | -                    | -                | -                   | -            | -                   | -                | -                    | -                | -                   | -                | 1.26<br>(0.82; 1.92) |                  |
| Low (rank 5-7)                                             | -                   | -            | -                    | -                | -                   | -            | -                   | -                | -                    | -                | -                   | -                | 1.07<br>(0.67; 1.70) |                  |

\***Model 1 (Model 1a:** individual socioeconomic status (SES) (FAS), **Model 1b:** individual socioeconomic status (FAS) adjusted for Sex, BMI, migration background, PA)

\*\***Model 2 (Model 2a:** student's neighbourhood SES (3 categories); **Model 2b:** student's neighbourhood SES (3 categories) adjusted for Sex, BMI, migration background, PA)

\*\*\***Model 3 (Model 3a:** Model 1+2, **Model 3b:** Model 1+2+School type, **Model 3c:** Model 1+2+School type+School's neighbourhood SES)

## STROBE (Strengthening The Reporting of OBServational Studies in Epidemiology) Checklist

A checklist of items that should be included in reports of observational studies. You must report the page number in your manuscript where you consider each of the items listed in this checklist. If you have not included this information, either revise your manuscript accordingly before submitting or note N/A.

**Note:** An Explanation and Elaboration article discusses each checklist item and gives methodological background and published examples of transparent reporting. The STROBE checklist is best used in conjunction with this article (freely available on the Web sites of PLoS Medicine at <http://www.plosmedicine.org/>, Annals of Internal Medicine at <http://www.annals.org/>, and Epidemiology at <http://www.epidem.com/>). Information on the STROBE Initiative is available at [www.strobe-statement.org](http://www.strobe-statement.org).

| Section and Item     | Item No. | Recommendation                                                                                                                                                                                                                                                                                                                                                                                                                                                                 | Reported on Page No. |
|----------------------|----------|--------------------------------------------------------------------------------------------------------------------------------------------------------------------------------------------------------------------------------------------------------------------------------------------------------------------------------------------------------------------------------------------------------------------------------------------------------------------------------|----------------------|
| Title and Abstract   | 1        | (a) Indicate the study's design with a commonly used term in the title or the abstract                                                                                                                                                                                                                                                                                                                                                                                         |                      |
|                      |          | (b) Provide in the abstract an informative and balanced summary of what was done and what was found                                                                                                                                                                                                                                                                                                                                                                            |                      |
| <b>Introduction</b>  |          |                                                                                                                                                                                                                                                                                                                                                                                                                                                                                |                      |
| Background/Rationale | 2        | Explain the scientific background and rationale for the investigation being reported                                                                                                                                                                                                                                                                                                                                                                                           |                      |
| Objectives           | 3        | State specific objectives, including any prespecified hypotheses                                                                                                                                                                                                                                                                                                                                                                                                               |                      |
| <b>Methods</b>       |          |                                                                                                                                                                                                                                                                                                                                                                                                                                                                                |                      |
| Study Design         | 4        | Present key elements of study design early in the paper                                                                                                                                                                                                                                                                                                                                                                                                                        |                      |
| Setting              | 5        | Describe the setting, locations, and relevant dates, including periods of recruitment, exposure, follow-up, and data collection                                                                                                                                                                                                                                                                                                                                                |                      |
| Participants         | 6        | (a) <i>Cohort study</i> —Give the eligibility criteria, and the sources and methods of selection of participants. Describe methods of follow-up<br><br><i>Case-control study</i> —Give the eligibility criteria, and the sources and methods of case ascertainment and control selection. Give the rationale for the choice of cases and controls<br><br><i>Cross-sectional study</i> —Give the eligibility criteria, and the sources and methods of selection of participants |                      |
|                      |          | (b) <i>Cohort study</i> —For matched studies, give matching criteria and number of exposed and unexposed<br><br><i>Case-control study</i> —For matched studies, give matching criteria and the number of controls per case                                                                                                                                                                                                                                                     |                      |
| Variables            | 7        | Clearly define all outcomes, exposures, predictors, potential confounders, and effect modifiers. Give diagnostic criteria, if applicable                                                                                                                                                                                                                                                                                                                                       |                      |

| Section and Item             | Item No. | Recommendation                                                                                                                                                                                                                                                                                            | Reported on Page No. |
|------------------------------|----------|-----------------------------------------------------------------------------------------------------------------------------------------------------------------------------------------------------------------------------------------------------------------------------------------------------------|----------------------|
| Data Sources/<br>Measurement | 8*       | For each variable of interest, give sources of data and details of methods of assessment (measurement). Describe comparability of assessment methods if there is more than one group                                                                                                                      |                      |
| Bias                         | 9        | Describe any efforts to address potential sources of bias                                                                                                                                                                                                                                                 |                      |
| Study Size                   | 10       | Explain how the study size was arrived at                                                                                                                                                                                                                                                                 |                      |
| Quantitative Variables       | 11       | Explain how quantitative variables were handled in the analyses. If applicable, describe which groupings were chosen and why                                                                                                                                                                              |                      |
| Statistical Methods          | 12       | (a) Describe all statistical methods, including those used to control for confounding                                                                                                                                                                                                                     |                      |
|                              |          | (b) Describe any methods used to examine subgroups and interactions                                                                                                                                                                                                                                       |                      |
|                              |          | (c) Explain how missing data were addressed                                                                                                                                                                                                                                                               |                      |
|                              |          | (d) <i>Cohort study</i> —If applicable, explain how loss to follow-up was addressed<br><i>Case-control study</i> —If applicable, explain how matching of cases and controls was addressed<br><i>Cross-sectional study</i> —If applicable, describe analytical methods taking account of sampling strategy |                      |
|                              |          | (e) Describe any sensitivity analyses                                                                                                                                                                                                                                                                     |                      |
| <b>Results</b>               |          |                                                                                                                                                                                                                                                                                                           |                      |
| Participants                 | 13*      | (a) Report numbers of individuals at each stage of study—eg numbers potentially eligible, examined for eligibility, confirmed eligible, included in the study, completing follow-up, and analysed                                                                                                         |                      |
|                              |          | (b) Give reasons for non-participation at each stage                                                                                                                                                                                                                                                      |                      |
|                              |          | (c) Consider use of a flow diagram                                                                                                                                                                                                                                                                        |                      |
| Descriptive Data             | 14*      | (a) Give characteristics of study participants (eg demographic, clinical, social) and information on exposures and potential confounders                                                                                                                                                                  |                      |
|                              |          | (b) Indicate number of participants with missing data for each variable of interest                                                                                                                                                                                                                       |                      |
|                              |          | (c) <i>Cohort study</i> —Summarise follow-up time (eg, average and total amount)                                                                                                                                                                                                                          |                      |
| Outcome Data                 | 15*      | <i>Cohort study</i> —Report numbers of outcome events or summary measures over time                                                                                                                                                                                                                       |                      |
|                              |          | <i>Case-control study</i> —Report numbers in each exposure category, or summary measures of exposure                                                                                                                                                                                                      |                      |
|                              |          | <i>Cross-sectional study</i> —Report numbers of outcome events or summary measures                                                                                                                                                                                                                        |                      |

| Section and Item         | Item No. | Recommendation                                                                                                                                                                                               | Reported on Page No. |
|--------------------------|----------|--------------------------------------------------------------------------------------------------------------------------------------------------------------------------------------------------------------|----------------------|
| Main Results             | 16       | (a) Give unadjusted estimates and, if applicable, confounder-adjusted estimates and their precision (eg, 95% confidence interval). Make clear which confounders were adjusted for and why they were included |                      |
|                          |          | (b) Report category boundaries when continuous variables were categorized                                                                                                                                    |                      |
|                          |          | (c) If relevant, consider translating estimates of relative risk into absolute risk for a meaningful time period                                                                                             |                      |
| Other Analyses           | 17       | Report other analyses done—eg analyses of subgroups and interactions, and sensitivity analyses                                                                                                               |                      |
| <b>Discussion</b>        |          |                                                                                                                                                                                                              |                      |
| Key Results              | 18       | Summarise key results with reference to study objectives                                                                                                                                                     |                      |
| Limitations              | 19       | Discuss limitations of the study, taking into account sources of potential bias or imprecision. Discuss both direction and magnitude of any potential bias                                                   |                      |
| Interpretation           | 20       | Give a cautious overall interpretation of results considering objectives, limitations, multiplicity of analyses, results from similar studies, and other relevant evidence                                   |                      |
| Generalisability         | 21       | Discuss the generalisability (external validity) of the study results                                                                                                                                        |                      |
| <b>Other Information</b> |          |                                                                                                                                                                                                              |                      |
| Funding                  | 22       | Give the source of funding and the role of the funders for the present study and, if applicable, for the original study on which the present article is based                                                |                      |

\*Give information separately for cases and controls in case-control studies and, if applicable, for exposed and unexposed groups in cohort and cross-sectional studies.

**Once you have completed this checklist, please save a copy and upload it as part of your submission. DO NOT include this checklist as part of the main manuscript document. It must be uploaded as a separate file.**

# BMJ Open

## Association of individual and neighbourhood socioeconomic status with physical activity and screen time in 7th grade boys and girls in Berlin, Germany – a cross sectional study.

|                                 |                                                                                                                                                                                                                                                                                                                                                                                                                                                                                                                                                                                                                                                                                                                                                                                                                                                                                                                                                                                                                                |
|---------------------------------|--------------------------------------------------------------------------------------------------------------------------------------------------------------------------------------------------------------------------------------------------------------------------------------------------------------------------------------------------------------------------------------------------------------------------------------------------------------------------------------------------------------------------------------------------------------------------------------------------------------------------------------------------------------------------------------------------------------------------------------------------------------------------------------------------------------------------------------------------------------------------------------------------------------------------------------------------------------------------------------------------------------------------------|
| Journal:                        | <i>BMJ Open</i>                                                                                                                                                                                                                                                                                                                                                                                                                                                                                                                                                                                                                                                                                                                                                                                                                                                                                                                                                                                                                |
| Manuscript ID                   | bmjopen-2017-017974.R2                                                                                                                                                                                                                                                                                                                                                                                                                                                                                                                                                                                                                                                                                                                                                                                                                                                                                                                                                                                                         |
| Article Type:                   | Research                                                                                                                                                                                                                                                                                                                                                                                                                                                                                                                                                                                                                                                                                                                                                                                                                                                                                                                                                                                                                       |
| Date Submitted by the Author:   | 04-Oct-2017                                                                                                                                                                                                                                                                                                                                                                                                                                                                                                                                                                                                                                                                                                                                                                                                                                                                                                                                                                                                                    |
| Complete List of Authors:       | Krist, Lilian; Charité University Medical Center, Institute for Social Medicine, Epidemiology and Health Economics<br>Bürger, Christin; Charité-Universitätsmedizin Berlin, Institute for Social Medicine, Epidemiology and Health Economics<br>Ströbele-Benschop, Nanette; University of Hohenheim, Institute of Nutritional Medicine<br>Roll, Stephanie; Charité Universitätsmedizin, Institute for Social Medicine, Epidemiology and Health Economics<br>Lotz, Fabian; Charité-Universitätsmedizin Berlin, Institute for Social Medicine, Epidemiology and Health Economics<br>Rieckmann, Nina; Charité Universitätsmedizin, Berlin School of Public Health<br>Muller-Nordhorn, Jacqueline; Universitätsmedizin Berlin, Berlin School of Public Health<br>Willich, Stefan; Charité University Medical Center<br>Müller-Riemenschneider, Falk; National University of Singapore, Saw Swee HOck School of Public Health; Charité-Universitätsmedizin Berlin, Institute for Social Medicine, Epidemiology and Health Economics |
| <b>Primary Subject Heading</b>: | Public health                                                                                                                                                                                                                                                                                                                                                                                                                                                                                                                                                                                                                                                                                                                                                                                                                                                                                                                                                                                                                  |
| Secondary Subject Heading:      | Epidemiology, Sociology, Sports and exercise medicine                                                                                                                                                                                                                                                                                                                                                                                                                                                                                                                                                                                                                                                                                                                                                                                                                                                                                                                                                                          |
| Keywords:                       | EPIDEMIOLOGY, Community child health < PAEDIATRICS, PREVENTIVE MEDICINE, PUBLIC HEALTH, SPORTS MEDICINE, SOCIAL MEDICINE                                                                                                                                                                                                                                                                                                                                                                                                                                                                                                                                                                                                                                                                                                                                                                                                                                                                                                       |
|                                 |                                                                                                                                                                                                                                                                                                                                                                                                                                                                                                                                                                                                                                                                                                                                                                                                                                                                                                                                                                                                                                |

SCHOLARONE™  
Manuscripts

1  
2  
3 **Association of individual and neighbourhood socioeconomic status with**  
4 **physical activity and screen time in 7<sup>th</sup> grade boys and girls in Berlin, Ger-**  
5 **many – a cross sectional study.**  
6  
7  
8  
9

10 *Lilian Krist<sup>1</sup>, Christin Bürger<sup>1</sup>, Nanette Ströbele-Benschop<sup>2</sup>, Stephanie Roll<sup>1</sup>, Fabian Lotz<sup>1</sup>,*  
11 *Nina Rieckmann<sup>3</sup>, Jacqueline Müller-Nordhorn<sup>3</sup>, Stefan N. Willich<sup>1</sup>, Falk Müller-*  
12 *Riemenschneider<sup>1,4</sup>*  
13  
14  
15

- 16  
17 1. *Institute for Social Medicine, Epidemiology and Health Economics, Charité - Universi-*  
18 *tätsmedizin Berlin, Germany*
- 19  
20 2. *Institute of Nutritional Medicine, University of Hohenheim, Germany*
- 21  
22 3. *Institute of Public Health, Charité-Universitätsmedizin Berlin, Germany*
- 23  
24 4. *Saw Swee Hock School of Public Health, National University of Singapore*  
25  
26  
27  
28  
29

30 **Corresponding author:**

31 Dr. Lilian Krist  
32 Institute for Social Medicine, Epidemiology and Health Economics  
33 Charité - Universitätsmedizin Berlin  
34 Luisenstr. 57  
35 10117 Berlin, Germany  
36 E-Mail: [lilian.krist@charite.de](mailto:lilian.krist@charite.de)  
37  
38 Tel: +49 30 450 529 109  
39  
40  
41  
42

43 **Word count: 4088**

44 **Keywords:** neighbourhood socioeconomic status, physical activity, screen time, adolescents  
45  
46  
47  
48  
49  
50  
51  
52  
53  
54  
55  
56  
57  
58  
59  
60

## ABSTRACT

**Objectives** Few studies have explored the impact of neighbourhood socioeconomic status (SES) on health behaviours in youths in Germany. Our aim was to investigate the association of individual and neighbourhood SES with physical activity (PA) and screen time (ST) in 12-13 year old students in Berlin.

**Design** Cross-sectional study.

**Setting** Secondary schools (high schools and integrated secondary schools) in Berlin, Germany.

**Participants** A total of 2586 students aged 12-13 years (7<sup>th</sup> grade).

**Main outcome measures** Sociodemographics, anthropometric data and health behaviours were assessed by self-report during classes. Primary outcome was the association of individual and neighbourhood SES with daily PA and ST. Students' characteristics were described with means or percentages. Comparisons were performed using Generalized Linear Mixed Model yielding odds ratios (OR) with 95% confidence intervals.

**Results** Mean ( $\pm$ SD) age was 12.5 $\pm$ 0.5 years, 50.5% were girls, and 34.1% had a migrant background. Individual SES was only associated with ST. The OR of engaging in more than two hours of ST per day was 1.88 [1.12;3.14] for students with low compared to high SES. Neighbourhood SES was associated with both PA (OR 1.51 [0.93; 2.46]) and ST (OR 1.40 [0.98; 2.00]), for students with low compared to high neighbourhood SES, when adjusting for individual covariates. Additional adjustment for school type and schools neighbourhood SES attenuated the associations somewhat.

**Conclusions** Lower individual SES was only associated with higher ST but not with PA, whereas lower neighbourhood SES was associated with higher PA and higher ST. After consideration of the school environment (school type and schools' neighbourhood SES) the effect of neighbourhood SES on PA and ST was attenuated somewhat, suggesting an important role in the complex relationship between individual SES, neighbourhood SES and school environment. Further research is warranted to unravel these relationships and to develop more targeted health promotion strategies in the future.

## Strengths and limitations of the study

- This study provides important new insights into the association of individual and neighbourhood socioeconomic status with PA and ST among 7<sup>th</sup> grade boys and girls attending secondary schools in Berlin, Germany.
- The study comprises a large sample with students recruited from all 12 districts of Berlin, including a variety of neighbourhoods with different levels of socioeconomic status.
- Anthropometric data and PA were not assessed objectively but via self-report.
- Only ST was assessed, while other kinds of sedentary behaviours were not taken into account.



## INTRODUCTION

Physical activity as well as sedentary behaviour have an important impact on health and wellbeing(1).

Low levels of PA are associated with higher health risks already among children and adolescents(2) and an increasing number of studies have identified sedentary behaviour as an independent risk factor for diseases such as diabetes and obesity in children and adolescents(3).

In the last decades however, sedentary behaviour among children and adolescents is increasing while the rates of children being active appear to be decreasing over time(4–7). In addition, longitudinal studies have shown a decline in PA and at the same time an increase in sedentary behaviour among children and adolescents with increasing age(8–10). ST (time spent watching TV or playing games on the computer or playing video games) is one important aspect of sedentary behaviour, even though it does not encompass the total time spent being sedentary(11).

While there is evidence of an association of age and sex with PA(12), studies exploring the influence of socioeconomic status and built and social environment of children show heterogeneous results(13–16).

A low individual SES is often associated with a higher BMI and more sedentary time, but not always with low PA(17–19). In addition to individual SES, studies investigating the social environment (i.e. social support and social networks, socioeconomic position and income inequality, racial discrimination, social cohesion and social capital) of children found evidence of an association with PA and diet(20–22). The built environment has also been shown to be associated with PA among children and youth(23).

Another aspect of the social environment is the neighbourhood socioeconomic status. Studies investigating the influence of neighbourhood SES on health showed an association of disadvantaged neighbourhoods with worse health status(24) or a higher risk for cardiovascular diseases(25). Mechanisms through which a lower neighbourhood socioeconomic status may influence PA and sedentary behaviour could be reduced municipal services such as recreational facilities and playgrounds, financial stress or less possibilities to own a gym membership(22). Also a higher crime rate may lead to less activities outside(26). With regard to these associations between PA, sedentary behaviour and the neighbourhood SES, study results are heterogeneous ranging from no association to a clear association

1  
2  
3 (27–30). Other studies in turn found that the neighbourhood SES was only a positive modifier for the  
4 association of environmental factors with PA and sedentary behaviour(31,32). Knowing more about  
5 independent associations of individual and neighbourhood SES could help to address groups of ado-  
6 lescents in a more targeted way when implementing prevention strategies (e.g. adapting the content of  
7 health promotion strategies to different neighbourhoods).

8  
9 Our aim was therefore to investigate the association of individual and neighbourhood socioeconomic  
10 status with PA and ST as one important form of sedentary behaviour in a population based sample of  
11 12 to 13 year old boys and girls attending secondary schools in Berlin, Germany.  
12  
13

## 14 15 16 17 18 19 20 21 **METHODS**

### 22 23 24 **Study design and setting**

25  
26 The present cross-sectional analysis is part of the BEST-prevention study, a three armed cluster ran-  
27 domized controlled trial that was conducted from 2010 to 2014 (baseline assessment was conducted  
28 from 2010 to 2011) with the aim to evaluate a parent involving smoking prevention program for 7<sup>th</sup>  
29 grade students in Berlin(33). Here, we report cross-sectional data regarding PA and ST among the  
30 students at baseline including associations with individual and neighbourhood socioeconomic status.  
31  
32  
33  
34  
35  
36  
37

### 38 39 **Participants and Recruitment**

40  
41 Details of the recruitment are described elsewhere(34). Briefly, prior to recruitment, permission of the  
42 Berlin senate of education, youth and research (Senatsverwaltung für Bildung, Jugend und Wissen-  
43 schaft) was obtained, and school principals and contact teachers from all 12 districts of Berlin were  
44 informed about the project. Students were eligible for the study if they: i) were in the 7<sup>th</sup> grade, ii)  
45 attended one of the participating schools, and iii) showed intellectual and physical ability to make an  
46 informed decision about study participation. Separate signed written informed consent was required  
47 from participating students as well as from at least one parent/caregiver. The study was approved by  
48 the ethical review committee of the Charité-Universitätsmedizin Berlin, Germany.  
49  
50  
51  
52  
53  
54  
55  
56  
57  
58  
59  
60

## Measurements

The study questionnaire is based on existing and validated questionnaires investigating adolescent health behaviour (e.g. Health Behaviour in School Aged Children, HBSC(35); German Children and Youths Survey, KIGGS(36)). It includes questions related to socio-demographics, smoking and other health behaviours, such as alcohol consumption, nutrition, PA and ST, as well as height and weight. It took about 30-40 minutes to complete the questionnaire. Our study group has the status of an associated project of the HBSC.

During a first visit to schools, the BEST study was presented to the students by trained research personnel and consent forms were distributed for students and parents/caregivers. During the second visit, which took place a few weeks later, baseline data were assessed with the questionnaire in the classroom among children, who had provided both consent forms.

## Outcome measures

### Physical activity (PA)

PA was assessed using three adapted items of the HBSC questionnaire. The first question read: 'On how many days in the past week were you physically active for at least 60 minutes?' According to the WHO guidelines, for our primary outcome we defined a student as meeting current guidelines if he or she was active at least 60 minutes on each of the last seven days (yes/no)(37). The other questions asked for the number of days and hours of moderate intensity PA per week.

### Screen time (ST)

ST was assessed with two questions (also part of the HBSC questionnaire) asking for the time spent each day watching TV or playing with the Computer. TV time was assessed by asking 'How many hours/day do you usually watch television in your free time?' for weekdays and weekend days separately. Computer time (minutes/day) was assessed by asking 'How many hours/day do you usually play games on a computer, or use a game console in your leisure time?'. Total ST was computed by adding up TV and computer time. Using a smartphone or tablet was not assessed. According to the AAP(38) recommendations we defined more than 2 hours of ST per day as high ST.

## Covariates

### Individual level

Sex, age and anthropometric data (height and weight) of the students were assessed via self-report. The BMI was calculated using the self-reported data. BMI categories are presented using cut-offs defined by the specific percentiles which at age 18 years correspond to the adult cut-off points for underweight ( $<18.5\text{kg/m}^2$ ), overweight ( $25\text{kg/m}^2$ ) and obesity ( $30\text{kg/m}^2$ ). According to that definition, underweight is defined as a BMI  $<10^{\text{th}}$  percentile, normal weight as a BMI between the  $10^{\text{th}}$  and the  $90^{\text{th}}$  percentile, overweight as a BMI between the  $90^{\text{th}}$  and the  $97^{\text{th}}$  percentile and obesity as a BMI  $\geq 97^{\text{th}}$  percentile(39,40). According to official definitions a student was defined as having a migration background if he or she was not born in Germany or if at least one parent was not born in Germany but moved to Germany after 1949(41).

### Individual socioeconomic status

To assess the individual socioeconomic status (SES) of the student, we used the family affluence scale (FAS), a validated instrument to assess the material affluence of the family asking for the number of cars and computers in the family, for holidays during the past 12 months, and whether the child has its own room(42). The FAS consists of values from zero to seven, with higher values indicating higher affluence, and can be categorized into three categories (low (0-3), moderate (4-5), and high affluence (6-7)). The FAS was completely assessed only at the 24 months follow-up, we therefore used the 24 months follow-up FAS to describe family SES at baseline.

### Neighbourhood socioeconomic status

For the SES of the students' neighbourhood, we used the social index defined and implemented by the 'Atlas of Social Structure' (Sozialstrukturatlas). It is an instrument used in Berlin to describe the social situation of Berlin by classifying 447 sub-areas (with on average 7500 habitants) of the 12 districts of Berlin accordingly(43,44). This social index reflects the distribution of social and health burden in Berlin. Social and health indicators are e.g. unemployment, welfare reception rate, average per capita

1  
2  
3 income and also premature mortality and avoidable deaths. The index ranges from 1 reflecting the best  
4  
5 to 7 reflecting the worst social situation of a district.  
6

### 7 8 School types

9  
10 In Berlin, two types of secondary schools exist: high schools with the possibility to achieve a high-  
11  
12 school diploma after 12 years, as well as integrated secondary schools (an integration of different  
13  
14 school types) with the possibility to achieve a high-school diploma after 13 years. More often than  
15  
16 high schools, integrated secondary schools are left by the students after the 10<sup>th</sup> grade with a secondary  
17  
18 school leaving certificate. The academic requirements are higher in high schools than in integrated  
19  
20 secondary schools(45).  
21

### 22 23 Schools' neighbourhood socioeconomic status

24  
25 Since the neighbourhood of the school can be different to that of students, we assessed this infor-  
26  
27 mation (analogous to the individual neighbourhood SES) in order to take an additional influencing  
28  
29 factor of the students' behaviour into account.  
30  
31

### 32 33 **Statistical analysis**

34  
35 All statistical analyses were performed for the 12 and 13 years old students due to the small number of  
36  
37 students younger than 12 and older than 13 years (8.1%). We used all data available for the respective  
38  
39 analysis; missing data were not imputed.  
40

41  
42 Characteristics of schools and students were analysed by descriptive statistical methods (e.g. mean and  
43  
44 standard deviation (SD), frequencies and percentages; p-values are derived from t-tests and chi-square-  
45  
46 tests).  
47

48  
49 Because of the nested structure of the data with both fixed and random effects, a generalized linear  
50  
51 mixed model (GLMM) with a logit link function was used for the analysis when comparing groups  
52  
53 (models with random intercept). In general, the random factors 'school' and 'class within school' (as  
54  
55 nested factor) were included into the models, with either PA or ST as the dependent variable. Results  
56  
57 are presented as odds ratios (OR) and 95%-confidence intervals (CI).  
58  
59  
60

1  
2  
3 These models were used to determine the association of several factors. For PA as the dependent vari-  
4 able, sex, migration background, BMI and ST were included into all models, in addition with individ-  
5 ual socioeconomic status (FAS-score) (Model 1) or students' neighbourhood SES (Model 2) or both  
6 (Model 3a). A final model included the aforementioned plus the two school level variables school type  
7 and schools' neighbourhood (Model 3b). The same procedure was performed for ST as the dependent  
8 variable, respectively. To be able to compare different models, the analyses were restricted to the  
9 number of students with non-missing data for the model with the largest number of variables included.  
10 As sensitivity analyses, to assess if associations are modified by gender, interaction effects on gender  
11 were included into the models. Additional sensitivity analyses were performed based on the maximum  
12 number of students with non-missing data for the respective model. All p-values are considered ex-  
13 ploratory (with no adjustment for multiple testing). Analyses were performed using the software pack-  
14 age SAS release 9.3 and 9.4 (SAS Institute Inc., Cary, NC, USA).  
15  
16  
17  
18  
19  
20  
21  
22  
23  
24  
25  
26  
27  
28

## 29 RESULTS

### 30 Characteristics of the study population

31  
32 Out of 214 contacted schools, 49 schools (23%; 4291 students) showed interest and were eligible for  
33 study participation. Before baseline assessment, 1268 out of these 4291 students dropped out including  
34 two entire schools. 2801 students participated at the baseline assessment. Out of those, we included  
35 2586 students aged 12 and 13 years in our analysis. Figure 1 shows the recruitment process of the  
36 schools, classes and students.  
37  
38  
39

40 Sociodemographic baseline characteristics of all participating students are presented in Table 1a. The  
41 mean ( $\pm$ SD) age of participants was  $12.4 \pm 0.5$  years ( $12.5 \pm 0.5$  for boys and  $12.4 \pm 0.5$  for girls) and  
42 the distribution between girls and boys was similar (50.5% vs. 49.5%). Of the entire sample, 34.1%  
43 were defined as having a migrant background. Boys reported more often a high individual SES than  
44 girls (53.7% vs. 46.3%). School characteristics of are presented in Table 1b. An association between  
45 the students' neighbourhood SES and the school type could be observed, indicating that the mean stu-  
46 dents' neighbourhood SES was higher among high school students than integrated secondary school  
47 students.  
48  
49  
50  
51  
52  
53  
54  
55  
56  
57  
58  
59  
60

Of the total sample, 12.8% fulfilled the WHO criteria being active for at least 60 minutes per day. The proportion of boys fulfilling the criteria was higher than in girls (15.9% of the boys vs. 9.8% of the girls, OR 1.7 [1.4;2.2];  $p < 0.001$ ) and boys were more active than girls ( $0.9 \pm 0.8$  versus  $0.6 \pm 0.6$  hours per day, mean difference 0.3 hours [0.2;0.3],  $p < 0.001$ ). More than 80% of the boys and almost two thirds of the girls reported more than 2 hours ST per day, OR 2.2 [1.8;2.6];  $p < 0.001$ . ST on weekend days was higher than on week days among all students ( $5.7 \pm 3.6$  versus  $3.5 \pm 2.7$ ) (Table 1c).

**Table 1a: Characteristics of the study sample**

| Individual level                                                      | Boys                                        | Girls           | Total           | p-value |
|-----------------------------------------------------------------------|---------------------------------------------|-----------------|-----------------|---------|
|                                                                       | Mean $\pm$ Standard Deviation (SD) or n (%) |                 |                 |         |
| Number of students, n (%)                                             | 1279 (49.5)                                 | 1307 (50.5)     | 2586            |         |
| Age (years, mean $\pm$ SD) (n=2586)                                   | 12.5 $\pm$ 0.5                              | 12.4 $\pm$ 0.5  | 12.4 $\pm$ 0.5  | <0.001  |
| 12 years, n (%)                                                       | 651 (50.9)                                  | 775 (59.3)      | 1426 (55.1)     | <0.001  |
| 13 years, n (%)                                                       | 628 (49.1)                                  | 532 (40.7)      | 1160 (44.9)     |         |
| Height (cm, mean $\pm$ SD) (n=2440)                                   | 161.1 $\pm$ 9.5                             | 160.1 $\pm$ 7.3 | 160.6 $\pm$ 8.4 | 0.003   |
| Weight (kg, mean $\pm$ SD) (n=2360)                                   | 49.5 $\pm$ 10.9                             | 47.0 $\pm$ 8.9  | 48.3 $\pm$ 10.0 | <0.001  |
| BMI* (kg/m <sup>2</sup> , mean $\pm$ SD) (n=2296)                     | 18.9 $\pm$ 3.1                              | 18.3 $\pm$ 2.7  | 18.6 $\pm$ 2.9  | <0.001  |
| BMI range                                                             | 11.8 – 30.9                                 | 11.7 – 33.8     | 11.7 – 33.8     |         |
| Underweight (BMI <10 <sup>th</sup> percentile)**                      | 126 (11.1)                                  | 218 (18.8)      | 344 (15.0)      | <0.001  |
| Normal weight (BMI 10 <sup>th</sup> - <90 <sup>th</sup> percentile)** | 822 (72.2)                                  | 843 (72.6)      | 1665 (72.4)     |         |
| Overweight (BMI 90 <sup>th</sup> - <97 <sup>th</sup> percentile)**    | 166 (14.6)                                  | 90 (7.8)        | 256 (11.1)      |         |
| Obesity (BMI $\geq$ 97 <sup>th</sup> percentile)**                    | 24 (2.1)                                    | 10 (0.9)        | 34 (1.5)        |         |
| Migrant background (n=2423)                                           | 396 (33.1)                                  | 429 (35.0)      | 825 (34.0)      | 0.307   |
| Individual SES*** (family affluence scale; FAS) (n=2139)              |                                             |                 |                 |         |
| high (FAS 6-7)                                                        | 569 (53.7)                                  | 500 (46.3)      | 1069 (50.0)     | 0.003   |
| moderate (FAS 4-5)                                                    | 371 (35.0)                                  | 441 (40.9)      | 812 (38.0)      |         |
| low (FAS 0-3)                                                         | 120 (11.3)                                  | 138 (12.8)      | 258 (12.1)      |         |
| Students' neighbourhood SES (n=2240)                                  | 1114                                        | 1126            | 2240            |         |
| Mean $\pm$ SD                                                         | 4.0 $\pm$ 1.9                               | 4.1 $\pm$ 1.9   | 4.0 $\pm$ 1.9   | 0.526   |
| 1 (best)                                                              | 127 (11.4)                                  | 123 (10.9)      | 250 (11.2)      |         |
| 2                                                                     | 182 (16.3)                                  | 194 (17.2)      | 376 (16.8)      |         |
| 3                                                                     | 143 (12.8)                                  | 119 (10.6)      | 262 (11.7)      |         |
| 4                                                                     | 215 (19.3)                                  | 229 (20.3)      | 444 (19.8)      |         |
| 5                                                                     | 162 (14.5)                                  | 160 (14.2)      | 322 (14.4)      |         |

|                                                                |            |            |             |        |
|----------------------------------------------------------------|------------|------------|-------------|--------|
| 6                                                              | 134 (12.0) | 134 (11.9) | 268 (12.0)  |        |
| 7 (worst)                                                      | 151 (13.6) | 167 (14.8) | 318 (14.2)  |        |
| School type (n=2586)                                           |            |            |             |        |
| High School <sup>a</sup> students (15 schools)                 | 507 (39.6) | 624 (47.7) | 1131 (43.7) | <0.001 |
| Integrated Secondary School <sup>b</sup> students (32 schools) | 772 (60.4) | 683 (52.3) | 1455 (56.3) |        |

(descriptive statistical methods)

\*Body Mass Index (kg/m<sup>2</sup>)

\*\* BMI percentiles according to Cole et al. (46,47)

\*\*\* Socioeconomic Status

<sup>a</sup> High schools (5<sup>th</sup> or 7<sup>th</sup> grade to 12<sup>th</sup> grade, graduation with high school diploma after 12<sup>th</sup> grade)

<sup>b</sup> Integrated secondary schools (integration of different school types, 7<sup>th</sup> grade to 13<sup>th</sup> grade, graduation with secondary school leaving certificate after 10<sup>th</sup> grade or high school diploma after 13<sup>th</sup> grade)



**Table 1b: Characteristics of schools**

| School level                                           | High Schools <sup>a</sup> | Integrated Secondary Schools <sup>b</sup> | Total     |        |
|--------------------------------------------------------|---------------------------|-------------------------------------------|-----------|--------|
| Schools' neighbourhood SES, Mean±SD (n=47)             | 3.5±1.4                   | 4.4±1.9                                   | 4.0±1.8   | <0.001 |
| n (%)                                                  |                           |                                           |           |        |
| 1 (best)                                               | 1 (6.7)                   | 3 (9.4)                                   | 4 (8.5)   |        |
| 2                                                      | 4 (26.7)                  | 3 (9.4)                                   | 7 (14.9)  |        |
| 3                                                      | 2 (13.3)                  | 4 (12.5)                                  | 6 (12.8)  |        |
| 4                                                      | 4 (26.7)                  | 7 (21.9)                                  | 11 (23.4) |        |
| 5                                                      | 2 (13.3)                  | 4 (12.5)                                  | 6 (12.8)  |        |
| 6                                                      | 2 (13.3)                  | 5 (15.6)                                  | 6 (12.8)  |        |
| 7 (worst)                                              | 0 (0.0)                   | 6 (18.8)                                  | 6 (12.8)  |        |
| Students' neighbourhood SES*, Mean±SD (n=2240)         | 3.1±1.6                   | 4.6±1.9                                   |           | <0.001 |
| Individual SES* (family affluence scale; FAS) (n=2139) |                           |                                           |           |        |
| n (%)                                                  |                           |                                           |           |        |
| High (FAS 6-7)                                         | 744 (65.8)                | 531 (36.5)                                |           | <0.001 |
| Moderate (FAS 4-5)                                     | 338 (29.9)                | 652 (44.8)                                |           |        |
| Low (FAS 0-3)                                          | 49 (4.3)                  | 272 (18.7)                                |           |        |

(descriptive statistical methods)

SES: Socioeconomic Status, SD: Standard deviation

<sup>a</sup>High schools (5<sup>th</sup> or 7<sup>th</sup> grade to 12<sup>th</sup> grade, graduation with high school diploma after 12<sup>th</sup> grade)

<sup>b</sup>Integrated secondary schools (integration of different school types, 7<sup>th</sup> grade to 13<sup>th</sup> grade, graduation with secondary school leaving certificate after 10<sup>th</sup> grade or high school diploma after 13<sup>th</sup> grade)

**Table 1c. Comparison of boys and girls aged 12-13 years**

|                                                                          | Boys       | Girls      |                          | p-value (boys vs. girls) | Total      |
|--------------------------------------------------------------------------|------------|------------|--------------------------|--------------------------|------------|
|                                                                          | Proportion | Proportion | Odds ratio [95% CI]      |                          | Proportion |
| WHO recommendations fulfilled: 60min/day every day per week (%) (n=2517) | 15.9       | 9.8        | 1.7 (1.4;2.2)            | <0.001                   | 12.8       |
| Screen time of 2 hours or more per day (%) (n=2503)                      | 81.5       | 66.9       | 2.2 (1.8;2.6)            | <0.001                   | 74.1       |
|                                                                          | Mean±SD    | Mean±SD    | Mean difference [95% CI] | p-value                  | Mean±SD    |

|                                                                     |           |           |                |        |           |
|---------------------------------------------------------------------|-----------|-----------|----------------|--------|-----------|
| Time spent with physical activity per day (hours, mean±SD) (n=2517) | 0.9±0.8   | 0.6±0.6   | 0.3 (0.2;0.3)  | <0.001 | 0.8±0.7   |
| Screen time (TV) (hours, mean±SD)                                   |           |           |                |        |           |
| school day (n=2555)                                                 | 2.2 ± 1.8 | 1.9 ± 1.6 | 0.3 (0.2;0.4)  | <0.001 | 2.0 ± 1.7 |
| weekend day (n=2550)                                                | 3.4 ± 2.0 | 2.9 ± 2.0 | 0.4 (0.3;0.6)  | <0.001 | 3.1 ± 2.0 |
| Screen time (Computer) (hours, mean±SD)                             |           |           |                |        |           |
| school day (n=2558)                                                 | 1.8 ± 1.8 | 1.3 ± 1.6 | 0.5 (0.4;0.7)  | <0.001 | 1.5 ± 1.7 |
| weekend day (n=2541)                                                | 3.1 ± 2.2 | 2.0 ± 2.0 | 1.1 (1.0;1.3)  | <0.001 | 2.6 ± 2.2 |
| Overall screen time (hours, mean±SD) (n=)                           |           |           |                |        |           |
| school day (n=2536)                                                 | 3.9 ± 2.7 | 3.1 ± 2.5 | 0.8 (0.6;0.97) | <0.001 | 3.5 ± 2.7 |
| weekend day (n=2518)                                                | 6.5 ± 3.6 | 4.9 ± 3.4 | 1.6 (1.3;1.8)  | <0.001 | 5.7 ± 3.6 |

(descriptive statistical methods)

SD: Standard deviation, CI: Confidence interval

### Association of individual and neighbourhood SES with PA and ST

Results of multivariable analyses are presented in figure 2 and figure 3. Results presented in figures 2 and 3 and supplemental tables 1 and 2 are based on an identical analysis population with complete information (n=1523). Results for the multivariable analysis not restricted to complete cases is presented in supplement tables 3 and 4. The results did not differ markedly between both approaches.

Individual SES was not associated with PA, but with ST. The lower the students' SES the higher the odds to spend more than two hours of ST per day (1.31 [1.00; 1.72] and 2.08 [1.26; 3.43]; p=0.008) for middle and low individual SES, respectively, compared to high SES). This association was attenuated slightly when additionally adjusting for school type and school neighbourhood SES (1.25 [0.95;1.64] and 1.88 [1.12;3.14]; p=0.036).

In contrast to individual SES, a lower neighbourhood SES was associated with a higher odds of engaging in 60 minutes per day in PA (1.34 [0.86;2.08] and 1.76 [1.12; 2.75]) for middle and low neighbourhood SES, respectively, compared to high neighbourhood SES; this association was attenuated somewhat when additionally adjusting for the school type and schools' neighbourhood SES.

Compared with high neighbourhood SES, students with lower neighbourhood SES were also more likely to spend more than two hours of ST per day. The effect was stronger for low than for middle neighbourhood SES (1.54 [1.10; 2.17] and 1.03 [0.75; 1.41]), and remained largely consistent when additionally adjusting for school type and school neighbourhood SES (1.40 [0.98; 2.00] and 1.37 [0.99; 1.91]).

1  
2  
3 There was no interaction effect between gender and ST regarding PA, nor between gender and PA  
4 regarding ST (data not shown).  
5  
6  
7

## 8 9 **DISCUSSION**

10  
11 In this study we investigated the association of individual and neighbourhood SES with PA and ST  
12 among 7<sup>th</sup> grade school students. The individual SES of the students in our study sample, measured  
13 with the family affluence scale, was significantly associated with ST. Students with lower SES were  
14 more likely to spend more than 2 hours per day viewing screen devices. Compared to high SES, low  
15 SES was more strongly associated with ST than middle SES. Similar results were found in other stud-  
16 ies(16,48,49). Potential reasons for these findings are that parents with better education and higher  
17 statuses may be more aware of the health consequences of excessive ST and thus have stricter rules  
18 regarding ST behaviour(50). Children from families with lower socioeconomic status may also more  
19 often have a TV in their room, which has been shown to be associated with higher ST levels(51).  
20 Moreover, it is well known that parents have an important role-modelling function, which influences  
21 children's behaviours, such as screen viewing(52). Since children of families with lower SES may  
22 more often have parents that engage in higher ST and/or watch more often TV together with their par-  
23 ents, they may in turn engage in more ST(53).  
24  
25  
26  
27  
28  
29  
30  
31  
32  
33  
34  
35  
36  
37

38 PA on the other hand was not associated with individual SES in our study population. This finding is  
39 in part consistent with the results of the HBSC study for Germany and with a few other  
40 studies(8,54,55). A possible explanation for this finding is that PA consists not only of organised  
41 sports or activities that require a club membership or sports equipment. On the contrary, a large part of  
42 PA among youths may be daily life activities, such as active commuting, or sports and activities in the  
43 neighbourhood and in parks which is independent from the individual SES(56). However, in contrast  
44 to our findings and the other studies, a variety of studies do show an association between socioeco-  
45 nomic status and PA, which has been highlighted in reviews by Sallis et al or Hanson et al(57,58). It  
46 should be noted that most of these studies are from the US or Australia and the explications for the  
47 observed associations, such as the higher prevalence of unsafe neighbourhoods or of neighbourhoods  
48 with less green space may not be directly transferable to Germany and Berlin.  
49  
50  
51  
52  
53  
54  
55  
56  
57  
58  
59  
60

1  
2  
3 The other main aspect of our study was the investigation of the neighbourhood SES and its association  
4 with PA and ST. The neighbourhood SES represents the social and health indicators of a city or of its  
5 districts including unemployment rate, welfare reception rate, average per capita income and others. In  
6  
7 our study, students living in low SES neighbourhood areas were more likely to be physically active  
8  
9 than those with middle or high neighbourhood SES. To a certain extent this is surprising and in con-  
10  
11 trast to many earlier studies that have reported mostly no or inverse associations between neighbour-  
12  
13 hood SES and PA(28,59–62). However, as suggested in an earlier study the observed finding in our  
14  
15 study may be related to higher active transportation among adolescents of families with lower SES  
16  
17 because they may be less likely to own a car resulting in more students using the bicycle or public  
18  
19 transportation to school(63). Similar to individual SES, another explication could be that the major  
20  
21 part of PA among adolescents consists of leisure or unstructured activities rather than organised team  
22  
23 sports(56). Thus, a membership in a sports club (which is less probable in neighbourhoods with lower  
24  
25 SES) would not affect the overall amount of PA.  
26  
27

28  
29 Low neighbourhood SES was also associated with higher ST compared to high neighbourhood SES.  
30  
31 This result is in line with a study by Carson et al(64). Neighbourhood safety, as suggested by Carson  
32  
33 et al, may be one possible explanation for this finding. In addition, the lack of suitable and well-  
34  
35 maintained recreation facilities could lead to more ST as replacement of other leisure time activities.  
36  
37 In contrast to our results, many studies investigating neighbourhood SES and its association with sed-  
38  
39 entary behaviour reported null results as shown in a recent review by Stierlin et al., suggesting that  
40  
41 other factors may be more important than neighbourhood SES in the context of adolescents' sedentary  
42  
43 behaviour(30). Possible reasons for these differences between findings may be related to different  
44  
45 study populations across individual studies but also the fact that our study only focussed on ST instead  
46  
47 of total sedentary behaviour. Screen viewing as a health behaviour has not been investigated widely in  
48  
49 the context of individual and neighbourhood SES, but it appears that in Berlin it is more closely linked  
50  
51 with these factors than PA. Hence, promoting alternative activity opportunities for adolescents living  
52  
53 in lower SES neighbourhoods could be a worthwhile target for interventions. In the context of the  
54  
55 existing literature it would be useful to also investigate total sedentary behaviour in future German  
56  
57 studies.  
58  
59  
60

1  
2  
3 In addition to individual and neighbourhood SES, school level factors play a role in the health behav-  
4 iour of school children(65). Moore et al found that school level affluence was independently associat-  
5 ed with health behaviours (except physical activity) of the school students after adjusting for the indi-  
6 vidual SES(66). When additionally including school type and school neighbourhood SES as covariates  
7 in our analysis, presented results for PA and ST were attenuated somewhat, indicating the potentially  
8 important role of school type and school neighbourhood SES on PA and ST. A possible explanation  
9 for this finding could be that adolescents living in areas with lower neighbourhood SES are more often  
10 attending an integrated secondary school. Since the academic standards of integrated secondary  
11 schools tend to be lower than those of high schools, it is possible that students of the first-mentioned  
12 have more leisure time than those of the latter(67,68).

13  
14 Some studies found that the school socioeconomic environment i.e. social networks and peer influ-  
15 ences had a greater effect on health behaviour among adolescents than the individual SES(66,69). This  
16 illustrates the complex interplay of individual SES, neighbourhood SES, and the school environment  
17 (school type and school neighbourhood SES), that may also be affected by parental choice of schools  
18 and other parental influences on school activities(70). A recent study from the UK has provided some  
19 further evidence for these complex relationships(66). Studies from Germany have also shown that the  
20 neighbourhood SES as well as the SES of the students tends to be correlated with the school type(71).  
21 Better educated parents tend to send their children to high schools rather than integrated secondary  
22 schools(72), which could imply that it is not only the school type itself influencing PA and ST, but the  
23 social environment of the student. But even if the choice of the school type is done by the parents and  
24 is influenced by their SES, targeting integrated secondary schools may be important and could be em-  
25 phasized more in health promotion activities. It appears that this may help to address the issue of indi-  
26 vidual SES on the one hand (more children with low SES in secondary schools) but also neighbour-  
27 hood SES on the other hand. Further research is needed to disentangle these complex relationships  
28 between individual and neighbourhood SES, as well as school environment. With additional research  
29 it could be investigated if some neighbourhoods might benefit more from screen time related activi-  
30 ties, while others might benefit more from PA related activities. The aim should be the ability to target  
31  
32  
33  
34  
35  
36  
37  
38  
39  
40  
41  
42  
43  
44  
45  
46  
47  
48  
49  
50  
51  
52  
53  
54  
55  
56  
57  
58  
59  
60

1  
2  
3 the content of health promotion activities according to school type and neighbourhood to meet greatest  
4  
5 needs.

6  
7 In addition to individual and neighbourhood SES, other factors like the built environment (i.e. number  
8  
9 of public transport stops, residential density, intersection density and the number of parks) could also  
10  
11 play an important role in adolescents' health behaviours(73). These factors may be mediators of the  
12  
13 observed associations but studies have also suggested that associations may be moderated by the built  
14  
15 environment (studies have shown that individuals with low neighbourhood SES had a greater benefit  
16  
17 of a good walkability than those with a high neighbourhood SES)(31,32). Future research should  
18  
19 therefore also include measurements of the built environment in Berlin to provide new insights into  
20  
21 the associations with PA.  
22  
23  
24

## 25 **Strengths and limitations**

26  
27 Strengths of our study include the size of our sample, as well as the proportion of students with migra-  
28  
29 tion background, socioeconomic status and gender distribution, which appear to be very similar to the  
30  
31 student population of Berlin(74). However, the results are only valid for regions with similar charac-  
32  
33 teristics as Berlin: an urban well-connected region with relatively safe neighbourhoods and good infra-  
34  
35 structure for transportation and cycling.  
36

37  
38 Some limitations have to be considered as well. First, FAS was only assessed at the 24 month follow  
39  
40 up. However, we assessed one item of the FAS (holiday) additionally at baseline and at the 12 month  
41  
42 follow-up. The answers were quite similar over the two years. We thus think the period of two years  
43  
44 implicates only minimal changes in the FAS level. We also found differences in the self-report FAS of  
45  
46 boys and girls, which is somewhat surprising. It is possible that the structure of the questionnaire led  
47  
48 to an overestimation among boys due to a higher interest in cars and computers (i.e. two key elements  
49  
50 of the FAS). Second, anthropometric data and PA were not measured objectively. Self-report of chil-  
51  
52 dren and adolescents, especially regarding PA, may lead to biased results through misreporting(75).  
53  
54 Measurement errors associated with self-report may further be influenced by SES of adolescents(76).  
55  
56 Future studies should use accelerometers or other means to objectively measure PA and sedentary  
57  
58 behaviour(77). Another limitation of our study is that we did not assess total sedentary behaviour and  
59  
60

1  
2  
3 that ST was determined based on the use of TV, Computer and video games as assessed by the HBSC  
4 questionnaire(35,78). Other increasingly popular screen devices (e.g. smartphones, tablets) and other  
5  
6 kinds of sedentary behaviours like sitting during homework, talking on the phone and sitting at school  
7  
8 were not taken into account, which may have led to an underestimation of ST.  
9

## 10 11 12 13 **CONCLUSION**

14  
15 Lower individual SES was only associated with higher ST but not with PA, whereas lower neighbour-  
16  
17 hood SES was associated with higher PA and higher ST. After consideration of the school environ-  
18  
19 ment (school type and schools neighbourhood SES) the effect of neighbourhood SES on PA and ST  
20  
21 was attenuated somewhat, suggesting an important role in the complex relationship between individual  
22  
23 SES, neighbourhood SES and school environment. Further research is warranted to unravel these rela-  
24  
25 tionships and to develop more targeted health promotion strategies in the future.  
26  
27  
28  
29  
30  
31

## 32 **ACKNOWLEDGEMENTS**

33  
34 The authors thank the Berlin City Council (Senatsverwaltung für Bildung, Jugend und Wissenschaft,  
35  
36 Berlin) and the participating schools, teachers and students for supporting the project.  
37  
38  
39

## 40 **CONTRIBUTORS**

41  
42 LK and FMR drafted the manuscript with intellectual input from SR, NR, JMN, and NSB. FMR su-  
43  
44 pervised the study and LK carried out the data collection and parts of the data analysis. FL and SR  
45  
46 were responsible for data assessment and statistical analyses, FMR, CB, NR, JMN and NSB were re-  
47  
48 sponsible for the design of the recruitment methods and the assessment tools, FMR, NR, JMN, and  
49  
50 SW conceptualized the study. All authors read and approved the final manuscript.  
51  
52

## 53 **FUNDING**

54  
55 This work was supported by ‘The German Cancer Aid (Deutsche Krebshilfe e.V.)’.  
56  
57  
58  
59  
60

## COMPETING INTERESTS

None declared.

## ETHICS APPROVAL

The study was approved by the ethical review committee of the Charité-Universitätsmedizin Berlin, Germany.

## DATA SHARING STATEMENT

No additional data available.

For peer review only



## REFERENCES

1. WHO. Global health risks. 2009.
2. Ferreira de Moraes AC, Carvalho HB, Siani A, Barba G, Veidebaum T, Tornaritis M, et al. Incidence of high blood pressure in children - Effects of physical activity and sedentary behaviors: The IDEFICS study: High blood pressure, lifestyle and children. *Int J Cardiol*. Elsevier Ireland Ltd; 2014 Nov 26;180C:165–70.
3. Danielsen YS, Júlíusson PB, Nordhus IH, Kleiven M, Meltzer HM, Olsson SJG, et al. The relationship between life-style and cardio-metabolic risk indicators in children: the importance of screen time. *Acta Paediatr*. 2011 Feb;100(2):253–9.
4. Santaliestra-Pasías AM, Mouratidou T, Verbestel V, Bammann K, Molnar D, Sieri S, et al. Physical activity and sedentary behaviour in European children: the IDEFICS study. *Public Health Nutr*. 2013 Oct 8;(4):1–12.
5. Manz K, Schlack R, Poethko-Müller C, Mensink G, Finger J, Lampert T. Physical activity and electronic media use in children and adolescents: results of the KiGGS study: first follow-up (KiGGS wave 1). *Bundesgesundheitsblatt Gesundheitsforschung Gesundheitsschutz*. 2014 Jul;57(7):840–8.
6. Fernandes HM. Physical activity levels in Portuguese adolescents: A 10-year trend analysis (2006-2016). *J Sci Med Sport*. Sports Medicine Australia; 2017;(Epub ahead of print).
7. Bucksch J, Sigmundova D, Hamrik Z, Troped PJ, Melkevik O, Ahluwalia N, et al. International Trends in Adolescent Screen-Time Behaviors from 2002 to 2010. *J Adolesc Heal*. Elsevier Inc.; 2016;58(4):417–25.
8. Currie C, Gabhainn A, Godeau E, Roberts C, Smith R, Currie D, et al. Health Policy for Children and Adolescents, No. 5 - Inequalities in Young People's Health. 2006.
9. Jago R, Solomon-Moore E, Macdonald-Wallis C, Sebire SJ, Thompson JL, Lawlor DA. Change in children's physical activity and sedentary time between Year 1 and Year 4 of primary school in the B-PROACTIV cohort. *Int J Behav Nutr Phys Act*. International Journal of Behavioral Nutrition and Physical Activity; 2017;14(1):33.
10. Lau EY, Dowda M, McIver KL, Pate RR. Changes in Physical Activity in the School,

- 1  
2  
3 Afterschool, and Evening Periods During the Transition From Elementary to Middle School. *J*  
4 *Sch Health*. 2017;87(7):531–7.  
5  
6  
7 11. Verloigne M, Van Lippevelde W, Maes L, Yildirim M, Chinapaw M, Manios Y, et al. Self-  
8 reported TV and computer time do not represent accelerometer-derived total sedentary time in  
9 10 to 12-year-olds. *Eur J Public Health*. 2013;23(1):30–2.  
10  
11  
12 12. Gorely T, Marshall SJ, Biddle SJH, Cameron N. Patterns of sedentary behaviour and physical  
13 activity among adolescents in the United Kingdom: Project STIL. *J Behav Med*.  
14 2007;30(6):521–31.  
15  
16  
17 13. Bringolf-Isler B, Mäder U, Dössegger A, Hofmann H, Puder JJ, Braun-Fahrländer C, et al.  
18 Regional differences of physical activity and sedentary behaviour in Swiss children are not  
19 explained by socio-demographics or the built environment. *Int J Public Health*.  
20 2015;60(3):291–300.  
21  
22  
23 14. Gorely T, Atkin AJ, Biddle SJ, Marshall SJ. Family circumstance, sedentary behaviour and  
24 physical activity in adolescents living in England: Project STIL. *Int J Behav Nutr Phys Act*.  
25 2009;6:33.  
26  
27  
28 15. Stone MR, Faulkner GE, Mitra R, Buliung RN. The freedom to explore: examining the  
29 influence of independent mobility on weekday, weekend and after-school physical activity  
30 behaviour in children living in urban and inner-suburban neighbourhoods of varying  
31 socioeconomic status. *Int J Behav Nutr Phys Act*. 2014 Jan;11:5.  
32  
33  
34 16. Hanson MD, Chen E. Socioeconomic status and health behaviors in adolescence: A review of  
35 the literature. *J Behav Med*. 2007;30(3):263–85.  
36  
37  
38 17. Kurth B-M, Schaffrath Rosario A. The prevalence of overweight and obese children and  
39 adolescents living in Germany. Results of the German Health Interview and Examination  
40 Survey for Children and Adolescents (KiGGS). *Bundesgesundheitsblatt Gesundheitsforschung*  
41 *Gesundheitsschutz*. 2007;50:736–43.  
42  
43  
44 18. Kuntz B, Lampert T. How healthy is the lifestyle of adolescents in Germany?  
45 *Gesundheitswesen*. 2013;75:67–76.  
46  
47  
48  
49  
50  
51  
52  
53  
54  
55  
56  
57  
58 19. Gose M, Plachta-Danielzik S, Willié B, Johannsen M, Landsberg B, Müller MJ. Longitudinal  
59  
60

- 1  
2  
3 influences of neighbourhood built and social environment on children's weight status. *Int J*  
4 *Environ Res Public Health*. 2013;10(10):5083–96.  
5  
6  
7 20. Suglia SF, Shelton RC, Hsiao A, Wang YC, Rundle A, Link BG. Why the Neighborhood  
8 Social Environment Is Critical in Obesity Prevention. *J Urban Heal*. 2016;93(1):206–12.  
9  
10  
11 21. Mitchell CA, Clark AF, Gilliland JA. Built Environment Influences of Children's Physical  
12 Activity: Examining Differences by Neighbourhood Size and Sex. *Int J Environ Res Public*  
13 *Health*. 2016;13(130).  
14  
15  
16  
17 22. McNeill LH, Kreuter MW, Subramanian S V. Social Environment and Physical activity: A  
18 review of concepts and evidence. *Soc Sci Med*. 2006;63(4):1011–22.  
19  
20  
21 23. Ding D, Sallis JF, Kerr J, Lee S, Rosenberg DE. Neighborhood Environment and Physical  
22 Activity Among Youth. *Am J Prev Med*. Elsevier Inc.; 2011;41(4):442–55.  
23  
24  
25 24. Ross CE, Mirowsky J. Neighborhood Disadvantage, Disorder, and Health. *J Health Soc Behav*.  
26 2001;42(3):258–76.  
27  
28  
29 25. Cubbin C, Hadden WC, Winkleby MA. Neighborhood Context and Cardiovascular Disease  
30 Risk Factors: The Contribution of Material Deprivation. *Ethnicity&Disease*. 2001;11:687–700.  
31  
32  
33 26. Janssen I. Crime and perceptions of safety in the home neighborhood are independently  
34 associated with physical activity among 11-15year olds. *Prev Med (Baltim)*. Elsevier B.V.;  
35 2014;66:113–7.  
36  
37  
38  
39 27. Dragano N, Bobak M, Wege N, Peasey A, Verde PE, Kubinova R, et al. Neighbourhood  
40 socioeconomic status and cardiovascular risk factors: a multilevel analysis of nine cities in the  
41 Czech Republic and Germany. *BMC Public Health*. 2007;7:255.  
42  
43  
44  
45 28. Bürgi R, Tomatis L, Murer K, de Bruin ED. Spatial physical activity patterns among primary  
46 school children living in neighbourhoods of varying socioeconomic status: a cross-sectional  
47 study using accelerometry and Global Positioning System. *BMC Public Health*. *BMC Public*  
48 *Health*; 2016;16(1):282.  
49  
50  
51  
52  
53 29. Kavanagh AM, Goller JL, King T, Jolley D, Crawford D, Turrell G. Urban area disadvantage  
54 and physical activity: a multilevel study in Melbourne, Australia. *J Epidemiol Community*  
55 *Health*. 2005;59(11):934–40.  
56  
57  
58  
59  
60

- 1  
2  
3 30. Stierlin AS, De Lepeleere S, Cardon G, Dargent-Molina P, Hoffmann B, Murphy MH, et al. A  
4 systematic review of determinants of sedentary behaviour in youth: a DEDIPAC- study. *Int J*  
5 *Behav Nutr Phys Act.* 2015;12(133):1–19.  
6  
7  
8  
9 31. De Meester F, Van Dyck D, De Bourdeaudhuij I, Deforche B, Sallis JF, Cardon G. Active  
10 living neighborhoods: is neighborhood walkability a key element for Belgian adolescents?  
11 *BMC Public Health.* BioMed Central Ltd; 2012;12(1):7.  
12  
13 32. Bringolf-Isler B, Kriemler S, Mäder U, Dössegger A, Hofmann H, Puder JJ, et al. Relationship  
14 between the objectively-assessed neighborhood area and activity behavior in Swiss youth. *Prev*  
15 *Med Reports.* Elsevier B.V.; 2014;1:14–20.  
16  
17 33. Krist L, Lotz F, Bürger C, Ströbele-Benschop N, Roll S, Rieckmann N, et al. Long-term  
18 effectiveness of a combined student-parent and a student-only smoking prevention intervention  
19 among 7th grade school children in Berlin, Germany. *Addiction.* 2016;111(12):2219–29.  
20  
21 34. Müller-Riemenschneider F, Krist L, Bürger C, Ströbele-Benschop N, Roll S, Rieckmann N, et  
22 al. Berlin evaluates school tobacco prevention - BEST prevention: study design and  
23 methodology. *BMC Public Health.* 2014 Jan;14(1):871.  
24  
25 35. Ottova V, Hillebrandt D, Kolip P, Hoffarth K, Bucksch J, Melzer W, et al. The HBSC Study in  
26 Germany – Study Design and Methodology. *Gesundheitswesen.* 2012;74(Suppl 1):S8-14.  
27  
28 36. Opper E, Worth A, Wagner M, Bös K. The module „Motorik“ in the German Health Interview  
29 and Examination Survey for Children and Adolescents (KiGGS). Motor Fitness and physical  
30 activity of children and young people. *Bundesgesundheitsblatt Gesundheitsforschung*  
31 *Gesundheitsschutz.* 2007;50:879–88.  
32  
33 37. WHO. Global Recommendations on Physical Activity for Health. 2010 p. 60.  
34  
35 38. American Academy of Pediatrics. Children, Adolescents, and Television. *Pediatrics.* 2001 Feb  
36 1;107(2):423–6.  
37  
38 39. Cole TJ, Flegal KM, Nicholls D, Jackson A a. Body mass index cut offs to define thinness in  
39 children and adolescents: international survey. *BMJ.* 2007 Jul 28;335(7612):194.  
40  
41 40. Cole TJ, Bellizzi MC, Flegal KM, Dietz WH. Establishing a standard definition for child  
42 overweight and obesity worldwide: international survey. *BMJ.* 2000;320:1240.  
43  
44  
45  
46  
47  
48  
49  
50  
51  
52  
53  
54  
55  
56  
57  
58  
59  
60

- 1
- 2
- 3 41. Bundesministerium der Justiz. Verordnung zur Erhebung der Merkmale des
- 4 Migrationshintergrundes (Migrationshintergrund- Erhebungsverordnung - MighEV ). 2010.
- 5
- 6
- 7 42. Currie CE, Elton RA, Todd J, Platt S. Indicators of socioeconomic status for adolescents : the
- 8 WHO Health Behaviour in School-aged Children Survey. *Health Educ Res.* 1997;12(3):385–
- 9 97.
- 10
- 11
- 12
- 13 43. Senatsverwaltung für Gesundheit und Soziales. Handlungsorientierter Sozialstrukturatlas
- 14 Berlin 2013. 2013.
- 15
- 16
- 17 44. Senatsverwaltung für Gesundheit Umwelt und Verbraucherschutz.
- 18 Gesundheitsberichterstattung Berlin - Spezialbericht Sozialstrukturatlas Berlin 2008. 2008.
- 19
- 20
- 21 45. Institut für Schulqualität der Länder Berlin und Brandenburg. Bildung in Berlin und
- 22 Brandenburg 2010. 2010.
- 23
- 24
- 25 46. Cole TJ, Bellizzi MC, Flegal KM, Dietz WH. Establishing a standard definition for child
- 26 overweight and obesity worldwide: international survey. *BMJ.* 2000;320(1240):1–6.
- 27
- 28
- 29 47. Cole TJ, Flegal KM, Nicholls D, Jackson AA. Body mass index cut offs to define thinness in
- 30 children and adolescents: international survey. *BMJ.* 2007;335(7612):194.
- 31
- 32
- 33 48. Lewis L, Maher C, Katzmarzyk P, Olds T. Individual and School-Level Socioeconomic
- 34 Gradients in Physical Activity in Australian Schoolchildren. *J Sch Health.* 2016;86(2):105–12.
- 35
- 36
- 37 49. Lampinen EK, Eloranta AM, Haapala EA, Lindi V, Väistö J, Lintu N, et al. Physical activity,
- 38 sedentary behaviour, and socioeconomic status among Finnish girls and boys aged 6–8 years.
- 39 *Eur J Sport Sci.* 2017;17(4):462–72.
- 40
- 41
- 42
- 43 50. Määttä S, Kaukonen R, Vepsäläinen H, Lehto E, Ylönen A, Ray C, et al. The mediating role of
- 44 the home environment in relation to parental educational level and preschool children’s screen
- 45 time: a cross-sectional study. *BMC Public Health.* *BMC Public Health;* 2017;17(688):1–11.
- 46
- 47
- 48
- 49 51. Dumuid D, Olds TS, Lewis LK, Maher C. Does home equipment contribute to socioeconomic
- 50 gradients in Australian children’s physical activity, sedentary time and screen time ? *BMC*
- 51 *Public Health.* *BMC Public Health;* 2016;16(736):1–8.
- 52
- 53
- 54
- 55 52. Brindova D, Pavelka J, Ševčíková A, Žežula I, van Dijk JP, Reijneveld SA, et al. How parents
- 56 can affect excessive spending of time on screen-based activities. *BMC Public Health.*
- 57
- 58
- 59
- 60

- 1  
2  
3 2014;14(1):1261.  
4  
5 53. Tandon PS, Zhou C, Sallis JF, Cain KL, Frank LD, Saelens BE, et al. Home environment  
6 relationships with children's physical activity, sedentary time, and screen time by  
7 socioeconomic status. *Int J Behav Nutr Phys Act*. 2012;9(88):1–9.  
8  
9  
10 54. Ortlieb S, Schneider G, Koletzko S, Berdel D, Berg A Von, Bauer C, et al. Physical activity  
11 and its correlates in children : a cross-sectional study (the GINIplus & LISApplus studies). *BMC*  
12 *Public Heal*. 2013;13(349):1–14.  
13  
14  
15 55. Barr-Anderson DJ, Flynn JI, Dowda M, Taverno Ross SE, Schenkelberg MA, Reid LA, et al.  
16 The Modifying Effects of Race/Ethnicity and Socioeconomic Status on the Change in Physical  
17 Activity From Elementary to Middle School. *J Adolesc Heal*. Elsevier Inc.; 2017;(Epub ahead  
18 of print).  
19  
20  
21 56. Schott K, Hunger M, Lampert T, Spengler S, Mess F, Mielck A. Social Differences in Physical  
22 Activity among Adolescents in Germany: Analyses Based on Information Concerning the  
23 Metabolic Equivalent of Task (MET). *Gesundheitswesen*. 2016;78:630–6.  
24  
25  
26 57. Hanson MD, Chen ÆE. Socioeconomic Status and Health Behaviors in Adolescence : A  
27 Review of the Literature. 2007;263–85.  
28  
29  
30 58. Sallis JF, Prochaska JJ, Taylor WC. A review of correlates of physical activity. *Med Sci Sports*  
31 *Exerc*. 2000;32(5):963–75.  
32  
33  
34 59. Voorhees CC, Catellier DJ, Carolina N, Hill C, Cohen DA, Dowda M. Neighborhood  
35 Socioeconomic Status and Non School Physical Activity and Body Mass Index in Adolescent  
36 Girls. *J Phys Act Heal*. 2009;6(6):731–40.  
37  
38  
39 60. Turrell G, Haynes M, Burton NW, Giles-Corti B, Oldenburg B, Wilson LA, et al.  
40 Neighborhood Disadvantage and Physical Activity: Baseline Results from the HABITAT  
41 Multilevel Longitudinal Study. *Ann Epidemiol*. Elsevier Inc; 2010;20(3):171–81.  
42  
43  
44 61. Molina-García J, Queralt A, Adams MA, Conway TL, Sallis JF. Neighborhood built  
45 environment and socio-economic status in relation to multiple health outcomes in adolescents.  
46 *Prev Med (Baltim)*. Elsevier Inc; 2017;(doi: 10.1016/j.ypmed.2017.08.026).  
47  
48  
49 62. Kim Y, Cubbin C. The role of neighborhood economic context on physical activity among  
50  
51  
52  
53  
54  
55  
56  
57  
58  
59  
60

- 1  
2  
3 children: Evidence from the Geographic Research on Wellbeing (GROW) study. *Prev Med*  
4 (Baltim). Elsevier Inc.; 2017;101:149–55.  
5  
6  
7 63. Cutumisu N, Bélanger-Gravel A, Laferté M, Lagarde F, Lemay JF, Gauvin L. Influence of area  
8 deprivation and perceived neighbourhood safety on active transport to school among urban  
9 Quebec preadolescents. *Can J Public Heal.* 2014;105(5):e376–82.  
10  
11  
12 64. Carson V, Spence JC, Cutumisu N, Cargill L. Association between neighborhood  
13 socioeconomic status and screen time among pre-school children: a cross-sectional study. *BMC*  
14 *Public Health.* 2010;10(367):17–9.  
15  
16  
17 65. Saab H, Klinger D. Social Science & Medicine School differences in adolescent health and  
18 wellbeing: Findings from the Canadian Health Behaviour in School-aged Children Study. *Soc*  
19 *Sci Med.* Elsevier Ltd; 2010;70(6):850–8.  
20  
21  
22 66. Moore GF, Littlecott HJ. School- and family-level socioeconomic status and health behaviors:  
23 multilevel analysis of a national survey in Wales. United Kingdom *J Sch Heal.*  
24 2015;85(4):267–75.  
25  
26  
27 67. Senatsverwaltung für Bildung Jugend und Familie. Auf Kurs zum Abitur - Wegweiser für die  
28 gymnasiale Oberstufe Schuljahr 2017/2018. 2017.  
29  
30  
31 68. Bezirksamt Pankow von Berlin. Weiterführende Schulen im Bezirk Pankow Schuljahr 2017 /  
32 2018. 2016.  
33  
34  
35 69. Salvy S, Miles JN V, Shih RA, Tucker JS, Amico EJD. Neighborhood , Family and Peer-Level  
36 Predictors of Obesity-Related Health Behaviors Among Young Adolescents. *J Pediatr Psychol.*  
37 2017;42(September):153–61.  
38  
39  
40 70. Green K. Extra □ Curricular Physical Education in England and Wales : A Sociological  
41 Perspective on a Sporting Bias. *Eur J Phys Educ.* 2000;5:179–207.  
42  
43  
44 71. Robert Koch-Institut. Gesundheitsberichterstattung des Bundes. Vol. 21,  
45 Lebensphasenspezifische Gesundheit von Kindern und Jugendlichen in Deutschland -  
46 Ergebnisse des Nationalen Kinder- und Jugendgesundheitssurveys (KiGGS). 2004.  
47  
48  
49 72. Nold D. Sozioökonomischer Status von Schülerinnen und Schülern 2008. Ergebnisse des  
50 Mikrozensus. *Wirtsch Stat.* 2010;2020(C):138–49.  
51  
52  
53  
54  
55  
56  
57  
58  
59  
60



- 1  
2  
3 73. Sallis JF, Cerin E, Conway TL, Adams MA, Frank LD, Pratt M, et al. Physical activity in  
4 relation to urban environments in 14 cities worldwide: A cross-sectional study. *Lancet*.  
5 2016;387(10034):2207–17.  
6  
7  
8  
9 74. Senatsverwaltung für Gesundheit Umwelt und Verbraucherschutz. Grundausswertung der  
10 Einschulungsdaten in Berlin 2010. 2010.  
11  
12 75. Merrill RM, Richardson JS. Validity of Self-Reported Height, Weight, and Body Mass Index:  
13 Findings from the National Health and Nutrition Examination Survey, 2001-2006. *Prev*  
14 *Chronic Dis*. 2009;6(4):A121.  
15  
16  
17 76. Slootmaker SM, Schuit AJ, Chinapaw MJ, Seidell JC, van Mechelen W. Disagreement in  
18 physical activity assessed by accelerometer and self-report in subgroups of age, gender,  
19 education and weight status. *Int J Behav Nutr Phys Act*. 2009;6(1):17.  
20  
21  
22 77. Hardy LL, Hills AP, Timperio A, Cliff D, Lubans D, Morgan PJ, et al. Journal of Science and  
23 Medicine in Sport A hitchhiker’s guide to assessing sedentary behaviour among young people:  
24 Deciding what method to use. *J Sci Med Sport*. Sports Medicine Australia; 2013;16(1):28–35.  
25  
26  
27 78. Roberts C, Freeman J, Samdal O, Schnohr CW, de Looze ME, Nic Gabhainn S, et al. The  
28 Health Behaviour in School-aged Children (HBSC) study: methodological developments and  
29 current tensions. *Int J Public Health*. 2009 Sep;54 Suppl 2:140–50.  
30  
31  
32  
33  
34  
35  
36  
37  
38  
39  
40  
41  
42  
43  
44  
45  
46  
47  
48  
49  
50  
51  
52  
53  
54  
55  
56  
57  
58  
59  
60



**Figures**

Figure 1. Flowchart of the recruitment process

Figure 2. Multivariable analysis of physical activity associated factors among 12 and 13 years old students (complete case analysis, n=1523)

Figure 3. Multivariable analysis of screen time associated factors among 12 and 13 years old students (complete case analysis, n=1523)

**Supplementary files**

Supplementary table 1. Multivariable analysis of physical activity associated factors among 12 and 13 years old students (complete case analysis, n=1523)

Supplementary table 2. Multivariable analysis of screen time associated factors among 12 and 13 years old students (complete case analysis, n=1523)

Supplementary table 3. Multivariable analysis of physical activity associated factors among 12 and 13 years old students (unequal sample sizes)

Supplementary table 4. Multivariable analysis of screen time associated factors among 12 and 13 years old students (unequal sample sizes)

1  
2  
3  
4  
5  
6  
7  
8  
9  
10  
11  
12  
13  
14  
15  
16  
17  
18  
19  
20  
21  
22  
23  
24  
25  
26  
27  
28  
29  
30  
31  
32  
33  
34  
35  
36  
37  
38  
39  
40  
41  
42  
43  
44  
45  
46  
47  
48  
49  
50  
51  
52  
53  
54  
55  
56  
57  
58  
59  
60

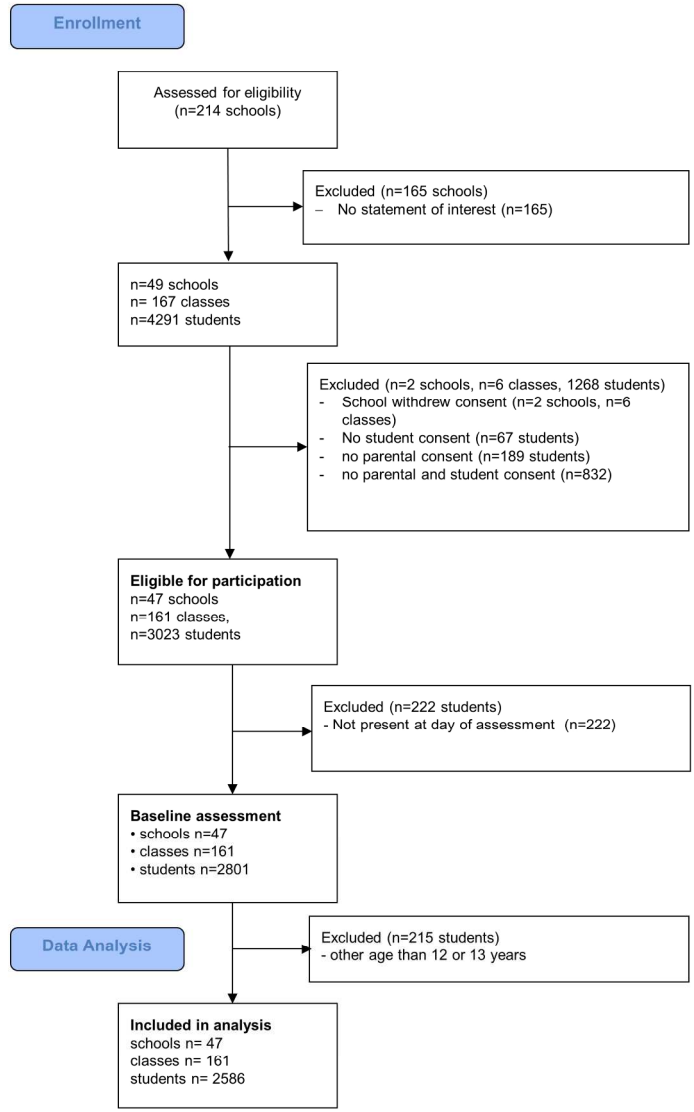

Flowchart of the recruitment process

254x338mm (300 x 300 DPI)

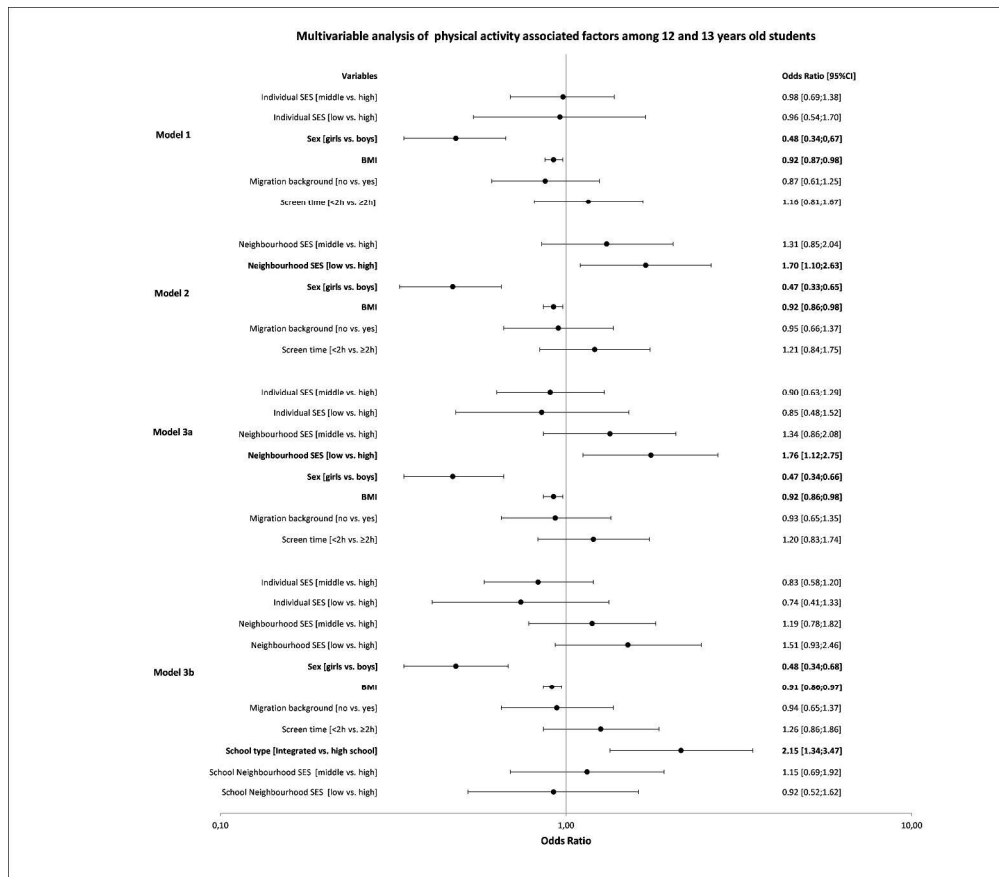

Multivariable analysis of physical activity associated factors among 12 and 13 years old students (complete case analysis, n=1523)

380x331mm (300 x 300 DPI)

only

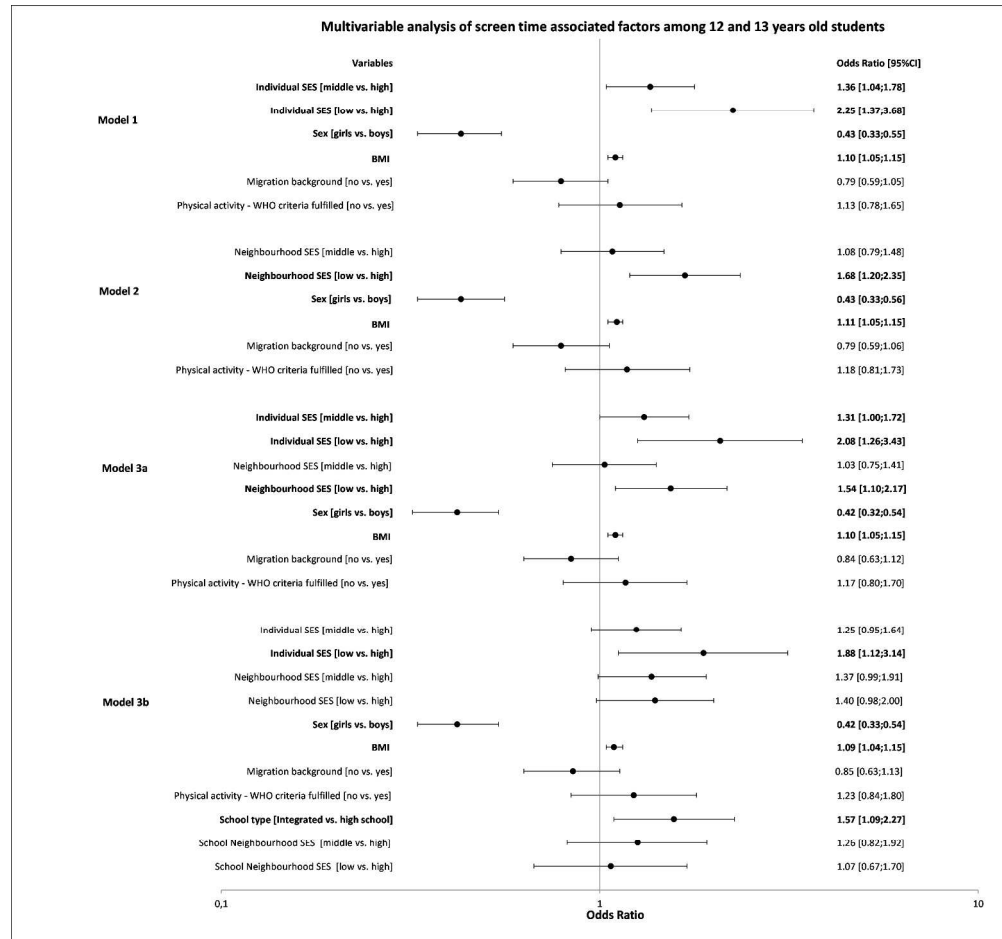

Multivariable analysis of screen time associated factors among 12 and 13 years old students (complete case analysis, n=1523)

333x312mm (300 x 300 DPI)

Supplementary table 1: Multivariable analysis of physical activity associated factors among 12 and 13 years old students

| WHO criteria for physical activity (at least 60 minutes per day physically active) fulfilled: |                   |                  |                  |                  |                   |                  |                   |                  |
|-----------------------------------------------------------------------------------------------|-------------------|------------------|------------------|------------------|-------------------|------------------|-------------------|------------------|
|                                                                                               | Model 1*          |                  | Model 2**        |                  | Model 3***        |                  |                   |                  |
|                                                                                               |                   |                  |                  |                  | Model 3a          |                  | Model 3b          |                  |
|                                                                                               | OR (95% CI)       | p-value          | OR (95% CI)      | p-value          | OR (95% CI)       | p-value          | OR (95% CI)       | p-value          |
| <b>Individual socioeconomic status (FAS)</b>                                                  |                   | 0.984            | -                | -                |                   | 0.792            |                   | 0.476            |
| High                                                                                          | 1                 |                  | -                | -                | 1                 |                  | 1                 |                  |
| Middle                                                                                        | 0.98 (0.69; 1.38) |                  | -                | -                | 0.90 (0.63;1.29)  |                  | 0.83 (0.58; 1.20) |                  |
| Low                                                                                           | 0.96 (0.54; 1.70) |                  | -                | -                | 0.85 (0.48; 1.52) |                  | 0.74 (0.41; 1.33) |                  |
| <b>Students' neighbourhood SES</b>                                                            | -                 | -                | -                | <b>0.058</b>     |                   | <b>0.047</b>     |                   | 0.253            |
| High (rank 1-2)                                                                               | -                 | -                | 1                |                  | 1                 |                  | 1                 |                  |
| Middle (rank 3-4)                                                                             | -                 | -                | 1.31 (0.85;2.04) |                  | 1.34 (0.86; 2.08) |                  | 1.19 (0.78; 1.82) |                  |
| Low (rank 5-7)                                                                                | -                 | -                | 1.70 (1.10;2.63) |                  | 1.76 (1.12; 2.75) |                  | 1.51 (0.93; 2.46) |                  |
| <b>Sex</b>                                                                                    |                   | <b>&lt;0.001</b> |                  | <b>&lt;0.001</b> |                   | <b>&lt;0.001</b> |                   | <b>&lt;0.001</b> |
| Boys                                                                                          | 1                 |                  | 1                |                  | 1                 |                  | 1                 |                  |
| Girls                                                                                         | 0.48 (0.34; 0.67) |                  | 0.47 (0.33;0.65) |                  | 0.47 (0.34; 0.66) |                  | 0.48 (0.34; 0.68) |                  |
| <b>BMI</b>                                                                                    | 0.92 (0.87; 0.98) | <b>0.007</b>     | 0.92 (0.86;0.98) | <b>0.005</b>     | 0.92 (0.86; 0.98) | <b>0.006</b>     | 0.91 (0.86; 0.97) | <b>0.003</b>     |
| <b>Migration background</b>                                                                   |                   | 0.457            |                  | 0.786            |                   | 0.716            |                   | 0.761            |
| yes                                                                                           | 1                 |                  | 1                |                  | 1                 |                  | 1                 |                  |
| no                                                                                            | 0.87 (0.61; 1.25) |                  | 0.95 (0.66;1.37) |                  | 0.93 (0.65; 1.35) |                  | 0.94 (0.65; 1.37) |                  |
| <b>Screen time</b>                                                                            |                   | 0.429            |                  | 0.311            | -                 | 0.334            |                   | 0.233            |
| ≥2 hours                                                                                      | 1                 |                  | 1                |                  | 1                 |                  | 1                 |                  |
| <2 hours                                                                                      | 1.16 (0.81; 1.67) |                  | 1.21 (0.84;1.75) |                  | 1.20 (0.83; 1.74) |                  | 1.26 (0.86; 1.86) |                  |
| <b>School type</b>                                                                            | -                 | -                | -                | -                | -                 |                  |                   | <b>0.002</b>     |
| High School                                                                                   | -                 | -                | -                | -                | -                 |                  | 1                 |                  |
| Integrated Secondary School                                                                   | -                 | -                | -                | -                | -                 |                  | 2.15 (1.34; 3.47) |                  |
| <b>Schools' neighbourhood SES</b>                                                             | -                 | -                | -                | -                | -                 |                  |                   | 0.723            |
| High (rank 1-2)                                                                               | -                 | -                | -                | -                | -                 |                  | 1                 |                  |
| Middle (rank 3-4)                                                                             | -                 | -                | -                | -                | -                 |                  | 1.15 (0.69; 1.92) |                  |
| Low (rank 5-7)                                                                                | -                 | -                | -                | -                | -                 |                  | 0.92 (0.52; 1.62) |                  |

Complete case analysis (n=1523)

\***Model 1:** individual socioeconomic status (FAS) adjusted for Sex, BMI, migration background, screen time

\*\***Model 2:** students' neighbourhood SES (3 categories) adjusted for Sex, BMI, migration background, screen time

\*\*\***Model 3 (Model 3a: Model 1+2, Model 3b: Model 1+2+School type+Schools' neighbourhood SES**

|                                                        | High screen time (>2 hours per day) |                  |                  |                  |                   |                  |                   |                  |
|--------------------------------------------------------|-------------------------------------|------------------|------------------|------------------|-------------------|------------------|-------------------|------------------|
|                                                        | Model 1*                            |                  | Model 2**        |                  | Model 3***        |                  |                   |                  |
|                                                        |                                     |                  |                  |                  | Model 3a          |                  | Model 3b          |                  |
|                                                        | OR (95% CI)                         | p-value          | OR (95% CI)      | p-value          | OR (95% CI)       | p-value          | OR (95% CI)       | p-value          |
| <b>Individual SES (FAS)</b>                            |                                     | <b>0.002</b>     | -                | -                |                   | <b>0.008</b>     |                   | <b>0.036</b>     |
| High                                                   | 1                                   |                  | -                | -                | 1                 |                  | 1                 |                  |
| Middle                                                 | 1.36 (1.04; 1.78)                   |                  | -                | -                | 1.31 (1.00; 1.72) |                  | 1.25 (0.95; 1.64) |                  |
| Low                                                    | 2.25 (1.37; 3.68)                   |                  | -                | -                | 2.08 (1.26; 3.43) |                  | 1.88 (1.12; 3.14) |                  |
| <b>Students' neighbourhood SES</b>                     | -                                   | -                |                  | <b>0.005</b>     |                   | <b>0.019</b>     |                   | 0.109            |
| High (rank 1-2)                                        | -                                   | -                | 1                |                  | 1                 |                  | <b>1</b>          |                  |
| Middle (rank 3-4)                                      | -                                   | -                | 1.08 (0.79;1.48) |                  | 1.03 (0.75; 1.41) |                  | 1.37 (0.99; 1.91) |                  |
| Low (rank 5-7)                                         | -                                   | -                | 1.68 (1.20;2.35) |                  | 1.54 (1.10; 2.17) |                  | 1.40 (0.98; 2.00) |                  |
| <b>Sex</b>                                             |                                     | <b>&lt;0.001</b> |                  |                  |                   | <b>&lt;0.001</b> |                   | <b>&lt;0.001</b> |
| Boys                                                   | 1                                   |                  | 1                | <b>&lt;0.001</b> | 1                 |                  | 1                 |                  |
| Girls                                                  | 0.43 (0.33; 0.55)                   |                  | 0.43 (0.33;0.56) |                  | 0.42 (0.32; 0.54) |                  | 0.42 (0.33; 0.54) |                  |
| <b>BMI</b>                                             | 1.10 (1.05; 1.15)                   | <b>&lt;0.001</b> | 1.11 (1.05;1.15) | <b>&lt;0.001</b> | 1.10 (1.05; 1.15) | <b>&lt;0.001</b> | 1.09 (1.04; 1.15) | <b>&lt;0.001</b> |
| <b>Migration background</b>                            |                                     | <b>0.102</b>     |                  | 0.117            |                   | 0.238            |                   | 0.262            |
| yes                                                    | 1                                   |                  | 1                |                  | 1                 |                  | 1                 |                  |
| no                                                     | 0.79 (0.59; 1.05)                   |                  | 0.79 (0.59;1.06) |                  | 0.84 (0.63; 1.12) |                  | 0.85 (0.63; 1.13) |                  |
| <b>Physical activity (PA) (WHO criteria fulfilled)</b> |                                     | 0.523            |                  | 0.389            |                   | 0.430            |                   | 0.297            |
| Yes                                                    | 1                                   |                  | 1                |                  | 1                 |                  | 1                 |                  |
| No                                                     | 1.13 (0.78; 1.65)                   |                  | 1.18 (0.81;1.73) |                  | 1.17 (0.80; 1.70) |                  | 1.23 (0.84; 1.80) |                  |
| <b>School type</b>                                     |                                     |                  | -                | -                | -                 | -                |                   | <b>0.016</b>     |
| High School                                            |                                     |                  | -                | -                | -                 | -                | <b>1</b>          |                  |
| Integrated Secondary School                            |                                     |                  | -                | -                | -                 | -                | 1.57 (1.09; 2.27) |                  |
| <b>Schools' neighbourhood SES</b>                      |                                     |                  | -                | -                | -                 | -                |                   | 0.535            |
| High (rank 1-2)                                        |                                     |                  | -                | -                | -                 | -                | <b>1</b>          |                  |
| Middle (rank 3-4)                                      |                                     |                  | -                | -                | -                 | -                | 1.26 (0.82; 1.92) |                  |
| Low (rank 5-7)                                         |                                     |                  | -                | -                | -                 | -                | 1.07 (0.67; 1.70) |                  |

Complete case analysis (n=1523)

\***Model 1:** individual socioeconomic status (FAS) adjusted for Sex, BMI, migration background, PA

\*\***Model 2:** students' neighbourhood SES (3 categories) adjusted for Sex, BMI, migration background, PA

\*\*\***Model 3 (Model 3a:** Model 1+2, **Model 3b:** Model 1+2+ School type + Schools' neighbourhood SES)

Supplementary table 3: Multivariable analysis of physical activity associated factors among 12 and 13 years old students

| WHO criteria for physical activity (at least 60 minutes per day physically active) fulfilled: |                   |                  |                  |                  |                   |                  |                   |                  |
|-----------------------------------------------------------------------------------------------|-------------------|------------------|------------------|------------------|-------------------|------------------|-------------------|------------------|
|                                                                                               | Model 1*          |                  | Model 2**        |                  | Model 3***        |                  |                   |                  |
|                                                                                               | (n=1760)          |                  | (n=1818)         |                  | Model 3a (n=1547) |                  | Model 3b (n=1523) |                  |
|                                                                                               | OR (95% CI)       | p-value          | OR (95% CI)      | p-value          | OR (95% CI)       | p-value          | OR (95% CI)       | p-value          |
| <b>Individual socioeconomic status (FAS)</b>                                                  |                   | 0.940            | -                | -                |                   | 0.763            |                   | 0.476            |
| High                                                                                          | 1                 |                  | -                | -                | 1                 |                  | 1                 |                  |
| Middle                                                                                        | 0.95 (0.69; 1.31) |                  | -                | -                | 0.89 (0.62; 1.26) |                  | 0.83 (0.58; 1.20) |                  |
| Low                                                                                           | 1.01 (0.60; 1.69) |                  | -                | -                | 0.87 (0.50; 1.54) |                  | 0.74 (0.41; 1.33) |                  |
| <b>Students' neighbourhood SES</b>                                                            | -                 | -                | -                | <b>0.028</b>     |                   | 0.079            |                   | 0.253            |
| High (rank 1-2)                                                                               | -                 | -                | 1                |                  | 1                 |                  | 1                 |                  |
| Middle (rank 3-4)                                                                             | -                 | -                | 1.24 (0.84;1.84) |                  | 1.27 (0.85; 1.88) |                  | 1.19 (0.78; 1.82) |                  |
| Low (rank 5-7)                                                                                | -                 | -                | 1.67 (1.14;2.44) |                  | 1.65 (1.07; 2.56) |                  | 1.51 (0.93; 2.46) |                  |
| <b>Sex</b>                                                                                    |                   | <b>&lt;0.001</b> |                  | <b>&lt;0.001</b> |                   | <b>&lt;0.001</b> |                   | <b>&lt;0.001</b> |
| Boys                                                                                          | 1                 |                  | 1                |                  | 1                 |                  | 1                 |                  |
| Girls                                                                                         | 0.51 (0.38; 0.69) |                  | 0.48 (0.36;0.65) |                  | 0.48 (0.35; 0.67) |                  | 0.48 (0.34; 0.68) |                  |
| <b>BMI</b>                                                                                    | 0.90 (0.85; 0.95) | <b>&lt;0.001</b> | 0.92 (0.87;0.97) | <b>0.002</b>     | 0.92 (0.87; 0.98) | <b>0.006</b>     | 0.91 (0.86; 0.97) | <b>0.003</b>     |
| <b>Migration background</b>                                                                   |                   | 0.844            |                  | 0.957            |                   | 0.588            |                   | 0.761            |
| yes                                                                                           | 1                 |                  | 1                |                  | 1                 |                  | 1                 |                  |
| no                                                                                            | 0.97 (0.69; 1.36) |                  | 0.99 (0.72;1.36) |                  | 0.91 (0.63; 1.30) |                  | 0.94 (0.65; 1.37) |                  |
| <b>Screen time</b>                                                                            |                   | 0.734            |                  | 0.165            | -                 | 0.425            |                   | 0.233            |
| ≥2 hours                                                                                      | 1                 |                  | 1                |                  | 1                 |                  | 1                 |                  |
| <2 hours                                                                                      | 1.06 (0.76; 1.49) |                  | 1.26 (0.91;1.74) |                  | 1.16 (0.81; 1.67) |                  | 1.26 (0.86; 1.86) |                  |
| <b>School type</b>                                                                            | -                 | -                | -                | -                | -                 |                  |                   | <b>0.002</b>     |
| High School                                                                                   | -                 | -                | -                | -                | -                 |                  | 1                 |                  |
| Integrated Secondary School                                                                   | -                 | -                | -                | -                | -                 |                  | 2.15 (1.34; 3.47) |                  |
| <b>Schools' neighbourhood SES</b>                                                             | -                 | -                | -                | -                | -                 |                  |                   | 0.723            |
| High (rank 1-2)                                                                               | -                 | -                | -                | -                | -                 |                  | 1                 |                  |
| Middle (rank 3-4)                                                                             | -                 | -                | -                | -                | -                 |                  | 1.15 (0.69; 1.92) |                  |
| Low (rank 5-7)                                                                                | -                 | -                | -                | -                | -                 |                  | 0.92 (0.52; 1.62) |                  |

\***Model 1:** individual socioeconomic status (FAS) adjusted for Sex, BMI, migration background, screen time

\*\***Model 2:** students' neighbourhood SES (3 categories) adjusted for Sex, BMI, migration background, screen time

\*\*\***Model 3 (Model 3a: Model 1+2, Model 3b: Model 1+2+School type+Schools'neighbourhood SES**

Supplementary table 4: Multivariable analysis of screen time associated factors among 12 and 13 years old students

|                                                        | High screen time (>2 hours per day) |                  |                  |                  |                   |                  |                   |                  |
|--------------------------------------------------------|-------------------------------------|------------------|------------------|------------------|-------------------|------------------|-------------------|------------------|
|                                                        | Model 1*                            |                  | Model 2**        |                  | Model 3***        |                  |                   |                  |
|                                                        | (n=1760)                            |                  | (n=1818)         |                  | Model 3a (n=1547) |                  | Model 3b (n=1523) |                  |
|                                                        | OR (95% CI)                         | p-value          | OR (95% CI)      | p-value          | OR (95% CI)       | p-value          | OR (95% CI)       | p-value          |
| <b>Individual SES (FAS)</b>                            |                                     | <b>0.004</b>     | -                | -                |                   | <b>0.007</b>     |                   | <b>0.036</b>     |
| High                                                   | 1                                   |                  | -                | -                | 1                 |                  | 1                 |                  |
| Middle                                                 | 1.28 (1.00; 1.64)                   |                  | -                | -                | 1.32 (1.01; 1.73) |                  | 1.25 (0.95; 1.64) |                  |
| Low                                                    | 2.03 (1.30; 3.15)                   |                  | -                | -                | 2.09 (1.27; 3.45) |                  | 1.88 (1.12; 3.14) |                  |
| <b>Students' neighbourhood SES</b>                     | -                                   | -                |                  | <b>0.002</b>     |                   | <b>0.019</b>     |                   | 0.109            |
| High (rank 1-2)                                        | -                                   | -                | 1                |                  | 1                 |                  | <b>1</b>          |                  |
| Middle (rank 3-4)                                      | -                                   | -                | 1.07 (0.80;1.44) |                  | 1.49 (1.08; 2.05) |                  | 1.37 (0.99; 1.91) |                  |
| Low (rank 5-7)                                         | -                                   | -                | 1.68 (1.22;2.29) |                  | 1.55 (1.10; 2.17) |                  | 1.40 (0.98; 2.00) |                  |
| <b>Sex</b>                                             |                                     | <b>&lt;0.001</b> |                  |                  |                   | <b>&lt;0.001</b> |                   | <b>&lt;0.001</b> |
| Boys                                                   | 1                                   |                  | 1                | <b>&lt;0.001</b> | 1                 |                  | 1                 |                  |
| Girls                                                  | 0.46 (0.37; 0.59)                   |                  | 0.45 (0.35;0.56) |                  | 0.42 (0.32; 0.54) |                  | 0.42 (0.33; 0.54) |                  |
| <b>BMI</b>                                             | 1.09 (1.05; 1.14)                   | <b>&lt;0.001</b> | 1.08 (1.04;1.13) | <b>&lt;0.001</b> | 1.09 (1.04; 1.14) | <b>&lt;0.001</b> | 1.09 (1.04; 1.15) | <b>&lt;0.001</b> |
| <b>Migration background</b>                            |                                     | <b>0.035</b>     |                  | 0.223            |                   | 0.267            |                   | 0.262            |
| yes                                                    | 1                                   |                  | 1                |                  | 1                 |                  | 1                 |                  |
| no                                                     | 0.75 (0.57; 0.98)                   |                  | 0.85 (0.65;1.11) |                  | 0.85 (0.63; 1.14) |                  | 0.85 (0.63; 1.13) |                  |
| <b>Physical activity (PA) (WHO criteria fulfilled)</b> |                                     | 0.738            |                  | 0.189            |                   | 0.510            |                   | 0.297            |
| Yes                                                    | 1                                   |                  | 1                |                  | 1                 |                  | 1                 |                  |
| No                                                     | 1.06 (0.75; 1.50)                   |                  | 1.25 (0.90;1.74) |                  | 1.14 (0.78; 1.66) |                  | 1.23 (0.84; 1.80) |                  |
| <b>School type</b>                                     |                                     |                  | -                | -                | -                 | -                |                   | <b>0.016</b>     |
| High School                                            |                                     |                  | -                | -                | -                 | -                | <b>1</b>          |                  |
| Integrated Secondary School                            |                                     |                  | -                | -                | -                 | -                | 1.57 (1.09; 2.27) |                  |
| <b>Schools' neighbourhood SES</b>                      |                                     |                  | -                | -                | -                 | -                |                   | 0.535            |
| High (rank 1-2)                                        |                                     |                  | -                | -                | -                 | -                | <b>1</b>          |                  |
| Middle (rank 3-4)                                      |                                     |                  | -                | -                | -                 | -                | 1.26 (0.82; 1.92) |                  |
| Low (rank 5-7)                                         |                                     |                  | -                | -                | -                 | -                | 1.07 (0.67; 1.70) |                  |

\*Model 1: individual socioeconomic status (FAS) adjusted for Sex, BMI, migration background, PA

\*\*Model 2: students' neighbourhood SES (3 categories) adjusted for Sex, BMI, migration background, PA

\*\*\*Model 3 (Model 3a: Model 1+2, Model 3b: Model 1+2+ School type + Schools' neighbourhood SES)



## STROBE (Strengthening The Reporting of OBServational Studies in Epidemiology) Checklist

A checklist of items that should be included in reports of observational studies. You must report the page number in your manuscript where you consider each of the items listed in this checklist. If you have not included this information, either revise your manuscript accordingly before submitting or note N/A.

**Note:** An Explanation and Elaboration article discusses each checklist item and gives methodological background and published examples of transparent reporting. The STROBE checklist is best used in conjunction with this article (freely available on the Web sites of PLoS Medicine at <http://www.plosmedicine.org/>, Annals of Internal Medicine at <http://www.annals.org/>, and Epidemiology at <http://www.epidem.com/>). Information on the STROBE Initiative is available at [www.strobe-statement.org](http://www.strobe-statement.org).

| Section and Item     | Item No. | Recommendation                                                                                                                                                                                                                                                                                                                                                                                                                                                                 | Reported on Page No. |
|----------------------|----------|--------------------------------------------------------------------------------------------------------------------------------------------------------------------------------------------------------------------------------------------------------------------------------------------------------------------------------------------------------------------------------------------------------------------------------------------------------------------------------|----------------------|
| Title and Abstract   | 1        | (a) Indicate the study's design with a commonly used term in the title or the abstract                                                                                                                                                                                                                                                                                                                                                                                         |                      |
|                      |          | (b) Provide in the abstract an informative and balanced summary of what was done and what was found                                                                                                                                                                                                                                                                                                                                                                            |                      |
| <b>Introduction</b>  |          |                                                                                                                                                                                                                                                                                                                                                                                                                                                                                |                      |
| Background/Rationale | 2        | Explain the scientific background and rationale for the investigation being reported                                                                                                                                                                                                                                                                                                                                                                                           |                      |
| Objectives           | 3        | State specific objectives, including any prespecified hypotheses                                                                                                                                                                                                                                                                                                                                                                                                               |                      |
| <b>Methods</b>       |          |                                                                                                                                                                                                                                                                                                                                                                                                                                                                                |                      |
| Study Design         | 4        | Present key elements of study design early in the paper                                                                                                                                                                                                                                                                                                                                                                                                                        |                      |
| Setting              | 5        | Describe the setting, locations, and relevant dates, including periods of recruitment, exposure, follow-up, and data collection                                                                                                                                                                                                                                                                                                                                                |                      |
| Participants         | 6        | (a) <i>Cohort study</i> —Give the eligibility criteria, and the sources and methods of selection of participants. Describe methods of follow-up<br><br><i>Case-control study</i> —Give the eligibility criteria, and the sources and methods of case ascertainment and control selection. Give the rationale for the choice of cases and controls<br><br><i>Cross-sectional study</i> —Give the eligibility criteria, and the sources and methods of selection of participants |                      |
|                      |          | (b) <i>Cohort study</i> —For matched studies, give matching criteria and number of exposed and unexposed<br><br><i>Case-control study</i> —For matched studies, give matching criteria and the number of controls per case                                                                                                                                                                                                                                                     |                      |
| Variables            | 7        | Clearly define all outcomes, exposures, predictors, potential confounders, and effect modifiers. Give diagnostic criteria, if applicable                                                                                                                                                                                                                                                                                                                                       |                      |

| Section and Item             | Item No. | Recommendation                                                                                                                                                                                                                                                                                            | Reported on Page No. |
|------------------------------|----------|-----------------------------------------------------------------------------------------------------------------------------------------------------------------------------------------------------------------------------------------------------------------------------------------------------------|----------------------|
| Data Sources/<br>Measurement | 8*       | For each variable of interest, give sources of data and details of methods of assessment (measurement). Describe comparability of assessment methods if there is more than one group                                                                                                                      |                      |
| Bias                         | 9        | Describe any efforts to address potential sources of bias                                                                                                                                                                                                                                                 |                      |
| Study Size                   | 10       | Explain how the study size was arrived at                                                                                                                                                                                                                                                                 |                      |
| Quantitative Variables       | 11       | Explain how quantitative variables were handled in the analyses. If applicable, describe which groupings were chosen and why                                                                                                                                                                              |                      |
| Statistical Methods          | 12       | (a) Describe all statistical methods, including those used to control for confounding                                                                                                                                                                                                                     |                      |
|                              |          | (b) Describe any methods used to examine subgroups and interactions                                                                                                                                                                                                                                       |                      |
|                              |          | (c) Explain how missing data were addressed                                                                                                                                                                                                                                                               |                      |
|                              |          | (d) <i>Cohort study</i> —If applicable, explain how loss to follow-up was addressed<br><i>Case-control study</i> —If applicable, explain how matching of cases and controls was addressed<br><i>Cross-sectional study</i> —If applicable, describe analytical methods taking account of sampling strategy |                      |
|                              |          | (e) Describe any sensitivity analyses                                                                                                                                                                                                                                                                     |                      |
| <b>Results</b>               |          |                                                                                                                                                                                                                                                                                                           |                      |
| Participants                 | 13*      | (a) Report numbers of individuals at each stage of study—eg numbers potentially eligible, examined for eligibility, confirmed eligible, included in the study, completing follow-up, and analysed                                                                                                         |                      |
|                              |          | (b) Give reasons for non-participation at each stage                                                                                                                                                                                                                                                      |                      |
|                              |          | (c) Consider use of a flow diagram                                                                                                                                                                                                                                                                        |                      |
| Descriptive Data             | 14*      | (a) Give characteristics of study participants (eg demographic, clinical, social) and information on exposures and potential confounders                                                                                                                                                                  |                      |
|                              |          | (b) Indicate number of participants with missing data for each variable of interest                                                                                                                                                                                                                       |                      |
|                              |          | (c) <i>Cohort study</i> —Summarise follow-up time (eg, average and total amount)                                                                                                                                                                                                                          |                      |
| Outcome Data                 | 15*      | <i>Cohort study</i> —Report numbers of outcome events or summary measures over time                                                                                                                                                                                                                       |                      |
|                              |          | <i>Case-control study</i> —Report numbers in each exposure category, or summary measures of exposure                                                                                                                                                                                                      |                      |
|                              |          | <i>Cross-sectional study</i> —Report numbers of outcome events or summary measures                                                                                                                                                                                                                        |                      |

| Section and Item         | Item No. | Recommendation                                                                                                                                                                                               | Reported on Page No. |
|--------------------------|----------|--------------------------------------------------------------------------------------------------------------------------------------------------------------------------------------------------------------|----------------------|
| Main Results             | 16       | (a) Give unadjusted estimates and, if applicable, confounder-adjusted estimates and their precision (eg, 95% confidence interval). Make clear which confounders were adjusted for and why they were included |                      |
|                          |          | (b) Report category boundaries when continuous variables were categorized                                                                                                                                    |                      |
|                          |          | (c) If relevant, consider translating estimates of relative risk into absolute risk for a meaningful time period                                                                                             |                      |
| Other Analyses           | 17       | Report other analyses done—eg analyses of subgroups and interactions, and sensitivity analyses                                                                                                               |                      |
| <b>Discussion</b>        |          |                                                                                                                                                                                                              |                      |
| Key Results              | 18       | Summarise key results with reference to study objectives                                                                                                                                                     |                      |
| Limitations              | 19       | Discuss limitations of the study, taking into account sources of potential bias or imprecision. Discuss both direction and magnitude of any potential bias                                                   |                      |
| Interpretation           | 20       | Give a cautious overall interpretation of results considering objectives, limitations, multiplicity of analyses, results from similar studies, and other relevant evidence                                   |                      |
| Generalisability         | 21       | Discuss the generalisability (external validity) of the study results                                                                                                                                        |                      |
| <b>Other Information</b> |          |                                                                                                                                                                                                              |                      |
| Funding                  | 22       | Give the source of funding and the role of the funders for the present study and, if applicable, for the original study on which the present article is based                                                |                      |

\*Give information separately for cases and controls in case-control studies and, if applicable, for exposed and unexposed groups in cohort and cross-sectional studies.

**Once you have completed this checklist, please save a copy and upload it as part of your submission. DO NOT include this checklist as part of the main manuscript document. It must be uploaded as a separate file.**

# BMJ Open

## Association of individual and neighbourhood socioeconomic status with physical activity and screen time in 7th grade boys and girls in Berlin, Germany – a cross sectional study.

|                                 |                                                                                                                                                                                                                                                                                                                                                                                                                                                                                                                                                                                                                                                                                                                                                                                                                                                                                                                                                                                                                                |
|---------------------------------|--------------------------------------------------------------------------------------------------------------------------------------------------------------------------------------------------------------------------------------------------------------------------------------------------------------------------------------------------------------------------------------------------------------------------------------------------------------------------------------------------------------------------------------------------------------------------------------------------------------------------------------------------------------------------------------------------------------------------------------------------------------------------------------------------------------------------------------------------------------------------------------------------------------------------------------------------------------------------------------------------------------------------------|
| Journal:                        | <i>BMJ Open</i>                                                                                                                                                                                                                                                                                                                                                                                                                                                                                                                                                                                                                                                                                                                                                                                                                                                                                                                                                                                                                |
| Manuscript ID                   | bmjopen-2017-017974.R3                                                                                                                                                                                                                                                                                                                                                                                                                                                                                                                                                                                                                                                                                                                                                                                                                                                                                                                                                                                                         |
| Article Type:                   | Research                                                                                                                                                                                                                                                                                                                                                                                                                                                                                                                                                                                                                                                                                                                                                                                                                                                                                                                                                                                                                       |
| Date Submitted by the Author:   | 03-Nov-2017                                                                                                                                                                                                                                                                                                                                                                                                                                                                                                                                                                                                                                                                                                                                                                                                                                                                                                                                                                                                                    |
| Complete List of Authors:       | Krist, Lilian; Charité University Medical Center, Institute for Social Medicine, Epidemiology and Health Economics<br>Bürger, Christin; Charité-Universitätsmedizin Berlin, Institute for Social Medicine, Epidemiology and Health Economics<br>Ströbele-Benschop, Nanette; University of Hohenheim, Institute of Nutritional Medicine<br>Roll, Stephanie; Charité Universitätsmedizin, Institute for Social Medicine, Epidemiology and Health Economics<br>Lotz, Fabian; Charité-Universitätsmedizin Berlin, Institute for Social Medicine, Epidemiology and Health Economics<br>Rieckmann, Nina; Charité Universitätsmedizin, Berlin School of Public Health<br>Muller-Nordhorn, Jacqueline; Universitätsmedizin Berlin, Berlin School of Public Health<br>Willich, Stefan; Charité University Medical Center<br>Müller-Riemenschneider, Falk; National University of Singapore, Saw Swee HOck School of Public Health; Charité-Universitätsmedizin Berlin, Institute for Social Medicine, Epidemiology and Health Economics |
| <b>Primary Subject Heading</b>: | Public health                                                                                                                                                                                                                                                                                                                                                                                                                                                                                                                                                                                                                                                                                                                                                                                                                                                                                                                                                                                                                  |
| Secondary Subject Heading:      | Epidemiology, Sociology, Sports and exercise medicine                                                                                                                                                                                                                                                                                                                                                                                                                                                                                                                                                                                                                                                                                                                                                                                                                                                                                                                                                                          |
| Keywords:                       | EPIDEMIOLOGY, Community child health < PAEDIATRICS, PREVENTIVE MEDICINE, PUBLIC HEALTH, SPORTS MEDICINE, SOCIAL MEDICINE                                                                                                                                                                                                                                                                                                                                                                                                                                                                                                                                                                                                                                                                                                                                                                                                                                                                                                       |
|                                 |                                                                                                                                                                                                                                                                                                                                                                                                                                                                                                                                                                                                                                                                                                                                                                                                                                                                                                                                                                                                                                |

SCHOLARONE™  
Manuscripts

1  
2  
3 **Association of individual and neighbourhood socioeconomic status with**  
4 **physical activity and screen time in 7<sup>th</sup> grade boys and girls in Berlin, Ger-**  
5 **many – a cross sectional study.**  
6  
7  
8  
9

10 *Lilian Krist<sup>1</sup>, Christin Bürger<sup>1</sup>, Nanette Ströbele-Benschop<sup>2</sup>, Stephanie Roll<sup>1</sup>, Fabian Lotz<sup>1</sup>,*  
11 *Nina Rieckmann<sup>3</sup>, Jacqueline Müller-Nordhorn<sup>3</sup>, Stefan N. Willich<sup>1</sup>, Falk Müller-*  
12 *Riemenschneider<sup>1,4</sup>*  
13  
14  
15

- 16  
17 1. *Institute for Social Medicine, Epidemiology and Health Economics, Charité - Universi-*  
18 *tätsmedizin Berlin, Germany*
- 19  
20 2. *Institute of Nutritional Medicine, University of Hohenheim, Germany*
- 21  
22 3. *Institute of Public Health, Charité-Universitätsmedizin Berlin, Germany*
- 23  
24 4. *Saw Swee Hock School of Public Health, National University of Singapore*  
25  
26  
27  
28  
29

30 **Corresponding author:**

31 Dr. Lilian Krist  
32 Institute for Social Medicine, Epidemiology and Health Economics  
33 Charité - Universitätsmedizin Berlin  
34 Luisenstr. 57  
35 10117 Berlin, Germany  
36 E-Mail: lilian.krist@charite.de  
37  
38  
39  
40  
41  
42

43 **Word count: 4283**

44 **Keywords:** neighbourhood socioeconomic status, physical activity, screen time, adolescents  
45  
46  
47  
48  
49  
50  
51  
52  
53  
54  
55  
56  
57  
58  
59  
60

## ABSTRACT

**Objectives** Few studies have explored the impact of neighbourhood socioeconomic status (SES) on health behaviours in youths in Germany. Our aim was to investigate the association of individual and neighbourhood SES with physical activity (PA) and screen time (ST) in 12-13 year old students in Berlin.

**Design** Cross-sectional study.

**Setting** Secondary schools (high schools and integrated secondary schools) in Berlin, Germany.

**Participants** A total of 2586 students aged 12-13 years (7<sup>th</sup> grade).

**Main outcome measures** Sociodemographics, anthropometric data and health behaviours were assessed by self-report during classes. Primary outcome was the association of individual and neighbourhood SES with meeting daily PA and exceeding daily ST recommendations. Students' characteristics were described with means or percentages. Comparisons were performed using Generalized Linear Mixed Model yielding odds ratios (OR) with 95% confidence intervals.

**Results** Mean( $\pm$ SD) age was 12.5 $\pm$ 0.5 years, 50.5% were girls, and 34.1% had a migrant background. When adjusting for individual covariates, associations of low versus high individual SES were 0.85 [0.48;1.52] for PA and 2.08 [1.26;3.43] for ST. Associations of low versus high neighbourhood SES were 1.76 [1.12;2.75] for PA and 1.54 [1.10;2.17] for ST. After additional adjustment for school type and school neighbourhood SES, associations comparing low versus high individual and neighbourhood SES were attenuated for PA (individual SES 0.74 [0.41;1.33] and neighbourhood SES 1.51 [0.93;2.46]) and ST (individual SES 1.88 [1.12;3.14] and neighbourhood SES 1.40 [0.98;2.00]).

### Conclusions

Lower individual and neighbourhood SES was associated with higher ST. Lower neighbourhood but not individual SES was associated with higher PA. After consideration of school type and school neighbourhood SES associations were attenuated and became insignificant for the relationship between neighbourhood SES, PA and ST. Further research is warranted to unravel the complex relationships between individual SES, neighbourhood SES and school environment to develop more targeted health promotion strategies in the future.

## Strengths and limitations of the study

- This study provides important new insights into the association of individual and neighbourhood socioeconomic status with physical activity and screen time among 7<sup>th</sup> grade boys and girls attending secondary schools in Berlin, Germany.
- The study comprises a large sample with students recruited from all 12 districts of Berlin, including a variety of neighbourhoods with different levels of socioeconomic status.
- Physical activity was not assessed objectively but via self-report and only ST was assessed, while other types of sedentary behaviours were not taken into account.

## INTRODUCTION

Physical activity as well as sedentary behaviour have an important impact on health and wellbeing(1).

Low levels of PA are associated with higher health risks already among children and adolescents(2) and an increasing number of studies have identified sedentary behaviour as an independent risk factor for diseases such as diabetes and obesity in children and adolescents(3).

In the last decades however, sedentary behaviour among children and adolescents is increasing while the rates of children being active appear to be decreasing over time(4–7). In addition, longitudinal studies have shown a decline in PA and at the same time an increase in sedentary behaviour among children and adolescents with increasing age(8–10). ST (time spent watching TV or playing games on the computer or playing video games) is one important aspect of sedentary behaviour, even though it does not encompass the total time spent being sedentary(11).

While there is evidence of an association of age and sex with PA(12), studies exploring the influence of socioeconomic status and built and social environment of children show heterogeneous results(13–16).

A low individual SES is often associated with a higher BMI and more sedentary time, but not always with low PA(17–19). In addition to individual SES, studies investigating the social environment (i.e. social support and social networks, socioeconomic position and income inequality, racial discrimination, social cohesion and social capital) of children found evidence of an association with PA and diet(20–22). The built environment has also been shown to be associated with PA among children and youth(23).

Another aspect of the social environment is the neighbourhood socioeconomic status. Studies investigating the influence of neighbourhood SES on health showed an association of disadvantaged neighbourhoods with worse health status(24) or a higher risk for cardiovascular diseases(25). Mechanisms through which a lower neighbourhood socioeconomic status may influence PA and sedentary behaviour could be reduced municipal services such as recreational facilities and playgrounds, financial stress or less possibilities to own a gym membership(22). Also a higher crime rate may lead to less activities outside(26). With regard to these associations between PA, sedentary behaviour and the neighbourhood SES, study results are heterogeneous ranging from no association to a clear association



1  
2  
3 (27–30). Other studies in turn found that the neighbourhood SES was only a positive modifier for the  
4 association of environmental factors with PA and sedentary behaviour(31,32). Knowing more about  
5 independent associations of individual and neighbourhood SES could help to address groups of ado-  
6 lescents in a more targeted way when implementing prevention strategies (e.g. adapting the content of  
7 health promotion strategies to different neighbourhoods).

8  
9 Our aim was therefore to investigate the association of individual and neighbourhood socioeconomic  
10 status with PA and ST as one important form of sedentary behaviour in a population based sample of  
11 12 to 13 year old boys and girls attending secondary schools in Berlin, Germany.  
12  
13  
14  
15  
16  
17  
18  
19

## 20 21 **METHODS**

### 22 23 **Study design and setting**

24  
25 The present cross-sectional analysis is part of the BEST-prevention study, a three armed cluster ran-  
26 domized controlled trial that was conducted from 2010 to 2014 (baseline assessment was conducted  
27 from 2010 to 2011) with the aim to evaluate a parent involving smoking prevention program for 7<sup>th</sup>  
28 grade students in Berlin(33). Here, we report cross-sectional data regarding PA and ST among the  
29 students at baseline including associations with individual and neighbourhood socioeconomic status.  
30  
31  
32  
33  
34  
35  
36  
37  
38

### 39 **Participants and Recruitment**

40  
41 Details of the recruitment are described elsewhere(34). Briefly, prior to recruitment, permission of the  
42 Berlin senate of education, youth and research (Senatsverwaltung für Bildung, Jugend und Wissen-  
43 schaft) was obtained, and school principals and contact teachers from all 12 districts of Berlin were  
44 informed about the project. Students were eligible for the study if they: i) were in the 7<sup>th</sup> grade, ii)  
45 attended one of the participating schools, and iii) showed intellectual and physical ability to make an  
46 informed decision about study participation. Separate signed written informed consent was required  
47 from participating students as well as from at least one parent/caregiver. The study was approved by  
48 the ethical review committee of the Charité-Universitätsmedizin Berlin, Germany.  
49  
50  
51  
52  
53  
54  
55  
56  
57  
58  
59  
60

## Measurements

The study questionnaire is based on existing and validated questionnaires investigating adolescent health behaviour (e.g. Health Behaviour in School Aged Children, HBSC(35); German Children and Youths Survey, KIGGS(36)). It includes questions related to socio-demographics, smoking and other health behaviours, such as alcohol consumption, nutrition, PA and ST, as well as height and weight. It took about 30-40 minutes to complete the questionnaire. Our study group has the status of an associated project of the HBSC.

During a first visit to schools, the BEST study was presented to the students by trained research personnel and consent forms were distributed for students and parents/caregivers. During the second visit, which took place a few weeks later, baseline data were assessed with the questionnaire in the classroom among children, who had provided both consent forms.

## Outcome measures

### Physical activity (PA)

PA was assessed using two adapted items of the HBSC questionnaire. The first question read: 'On how many days in the past week were you physically active for at least 60 minutes?' According to the WHO guidelines, for our primary outcome we defined a student as meeting current guidelines if he or she was active at least 60 minutes on each of the last seven days (yes/no)(37). The other question asked for the number of hours of moderate intensity PA per week ('How many hours per week are you physically active (any activity that increases your heart rate and makes you get out of breath)?') with examples of such activities. This number was divided by seven to obtain the number of hours of PA per day.

### Screen time (ST)

ST was assessed with two questions (also part of the HBSC questionnaire) asking for the time spent each day watching TV or playing with the Computer. TV time was assessed by asking 'How many hours/day do you usually watch television in your free time?' for weekdays and weekend days separately. Computer time (minutes/day) was assessed by asking 'How many hours/day do you usually

1  
2  
3 play games on a computer, or use a game console in your leisure time?'. Total ST was computed by  
4 adding up TV and computer time. Using a smartphone or tablet was not assessed. According to the  
5 AAP(38) recommendations we defined more than 2 hours of ST per day as high ST.  
6  
7  
8  
9

## 10 11 **Covariates**

### 12 13 Individual level

14  
15 Sex, age and anthropometric data (height and weight) of the students were assessed via self-report.  
16  
17 The BMI was calculated using the self-reported data. BMI categories are presented using cut-offs de-  
18 fined by the specific percentiles which at age 18 years correspond to the adult cut-off points for un-  
19 derweight ( $<18.5\text{kg/m}^2$ ), overweight ( $25\text{kg/m}^2$ ) and obesity ( $30\text{kg/m}^2$ ). According to that definition,  
20 underweight is defined as a BMI  $<10^{\text{th}}$  percentile, normal weight as a BMI between the  $10^{\text{th}}$  and the  
21  $90^{\text{th}}$  percentile, overweight as a BMI between the  $90^{\text{th}}$  and the  $97^{\text{th}}$  percentile and obesity as a BMI  
22  $\geq 97^{\text{th}}$  percentile(39,40).  
23  
24  
25  
26  
27  
28  
29

30  
31 According to official definitions a student was defined as having a migration background if he or she  
32 was not born in Germany or if at least one parent was not born in Germany but moved to Germany  
33 after 1949(41).  
34  
35  
36

### 37 38 Individual socioeconomic status

39  
40 To assess the individual socioeconomic status (SES) of the student, we used the family affluence scale  
41 (FAS), a validated instrument to assess the material affluence of the family asking for the number of  
42 cars and computers in the family, for holidays during the past 12 months, and whether the child has its  
43 own room(42). The FAS consists of values from zero to seven, with higher values indicating higher  
44 affluence, and can be categorized into three categories (low (0-3), moderate (4-5), and high affluence  
45 (6-7)). The FAS was completely assessed only at the 24 months follow-up, we therefore used the 24  
46 months follow-up FAS to describe family SES at baseline.  
47  
48  
49  
50  
51  
52  
53  
54  
55  
56  
57  
58  
59  
60

### Neighbourhood socioeconomic status

For the SES of the students' neighbourhood, we used the social index defined and implemented by the 'Atlas of Social Structure' (Sozialstrukturatlas). It is an instrument used in Berlin to describe the social situation of Berlin by classifying 447 sub-areas (with on average 7500 habitants) of the 12 districts of Berlin accordingly(43,44). This social index reflects the distribution of social and health burden in Berlin. Social and health indicators are e.g. unemployment, welfare reception rate, average per capita income and also premature mortality and avoidable deaths. The index ranges from 1 reflecting the best to 7 reflecting the worst social situation of a district.

### School types

In Berlin, two types of secondary schools exist: high schools with the possibility to achieve a high-school diploma after 12 years, as well as integrated secondary schools (an integration of different school types) with the possibility to achieve a high-school diploma after 13 years. More often than high schools, integrated secondary schools are left by the students after the 10<sup>th</sup> grade with a secondary school leaving certificate. The academic requirements are higher in high schools than in integrated secondary schools(45).

### School neighbourhood socioeconomic status

Since the neighbourhood of the school can be different to that of students, we assessed this information (analogous to the individual neighbourhood SES) in order to take an additional influencing factor of the students' behaviour into account.

## Statistical analysis

All statistical analyses were performed for the 12 and 13 year old students due to the small number of students younger than 12 and older than 13 years (8.1%). We used all data available for the respective analysis; missing data were not imputed.

Characteristics of schools and students were analysed by descriptive statistical methods (e.g. mean and standard deviation (SD), frequencies and percentages; p-values are derived from t-tests and chi-square-tests).

1  
2  
3 Because of the nested structure of the data with both fixed and random effects, a generalized linear  
4 mixed model (GLMM) with a logit link function was used for the analysis when comparing groups  
5 (models with random intercept). In general, the random factors 'school' and 'class within school' (as  
6 nested factor) were included into the models, with either PA or ST as the dependent variable. Results  
7 are presented as odds ratios (OR) and 95%-confidence intervals (CI).  
8  
9

10 These models were used to determine the association of several factors. For PA as the dependent vari-  
11 able, sex, migration background, BMI and ST were included into all models, in addition with individ-  
12 ual socioeconomic status (FAS-score) (Model 1) or students' neighbourhood SES (Model 2) or both  
13 (Model 3a). A final model included the aforementioned plus the two school level variables school type  
14 and school neighbourhood (Model 3b). The same procedure was performed for ST as the dependent  
15 variable, respectively. To be able to compare different models, the analyses were restricted to the  
16 number of students with non-missing data for the model with the largest number of variables included.  
17 As sensitivity analyses, to assess if associations are modified by gender, interaction effects on gender  
18 were included into the models. Additional sensitivity analyses were performed based on the maximum  
19 number of students with non-missing data for the respective model. All p-values are considered ex-  
20 ploratory (with no adjustment for multiple testing). Analyses were performed using the software pack-  
21 age SAS release 9.3 and 9.4 (SAS Institute Inc., Cary, NC, USA).  
22  
23  
24  
25  
26  
27  
28  
29  
30  
31  
32  
33  
34  
35  
36  
37  
38

## 39 RESULTS

### 40 Characteristics of the study population

41  
42 Out of 214 contacted schools, 49 schools (23%; 4291 students) showed interest and were eligible for  
43 study participation. Before baseline assessment, 1268 out of these 4291 students dropped out including  
44 two entire schools. 2801 students participated at the baseline assessment. Out of those, we included  
45 2586 students aged 12 and 13 years in our descriptive analyses and 1523 in our complete case anal-  
46 yses. Figure 1 shows the recruitment process of the schools, classes and students.  
47  
48  
49

50 Sociodemographic characteristics of all participating students are presented in Table 1a. The mean  
51 ( $\pm$ SD) age of participants was  $12.4 \pm 0.5$  years ( $12.5 \pm 0.5$  for boys and  $12.4 \pm 0.5$  for girls) and the  
52 distribution between girls and boys was similar (50.5% vs. 49.5%). Of the entire sample, 34.1% were  
53  
54  
55  
56  
57  
58  
59  
60

1  
2  
3 defined as having a migrant background. Boys reported more often a high individual SES than girls  
4 (53.7% vs. 46.3%). Mean neighbourhood SES was similar among boys and girls ( $4.0 \pm 1.9$  and  $4.1 \pm$   
5  $1.9$ ). Individual and neighbourhood SES were moderately correlated (spearman's rank correlation  
6 coefficient = 0.36;  $p < 0.001$ ). School characteristics are presented in Table 1b. An association between  
7 the students' neighbourhood SES and the school type could be observed, indicating that the mean stu-  
8 dents' neighbourhood SES was higher among high school students than integrated secondary school  
9 students.

10  
11  
12  
13  
14  
15  
16  
17 Of the total sample, 12.8% fulfilled the WHO criteria of being active for at least 60 minutes per day.  
18  
19 The proportion of boys fulfilling the criteria was higher than in girls (15.9% of the boys vs. 9.8% of  
20 the girls, OR 1.7 [1.4;2.2];  $p < 0.001$ ) and boys also spent more time being active than girls ( $0.9 \pm 0.8$   
21 versus  $0.6 \pm 0.6$  hours per day, mean difference 0.3 hours [0.2;0.3],  $p < 0.001$ ). 81.5% of the boys and  
22 66.9% of the girls reported more than 2 hours ST per day, OR 2.2 [1.8;2.6];  $p < 0.001$ . Average ST was  
23 also higher among boys than among girls ( $3.9 \pm 2.7$  hours vs.  $3.1 \pm 2.5$  hours;  $p < 0.001$  on week days and  
24  $6.5 \pm 3.6$  hours vs.  $4.9 \pm 3.4$  hours on weekend days.  
25  
26  
27  
28  
29  
30  
31  
32  
33  
34  
35  
36  
37  
38  
39  
40  
41  
42  
43  
44  
45  
46  
47  
48  
49  
50  
51  
52  
53  
54  
55  
56  
57  
58  
59  
60

Table 1a: Characteristics of the study sample

| Individual level                                                      | Boys                                    | Girls       | Total       | p-value |
|-----------------------------------------------------------------------|-----------------------------------------|-------------|-------------|---------|
|                                                                       | Mean ± Standard Deviation (SD) or n (%) |             |             |         |
| Number of students, n (%)                                             | 1279 (49.5)                             | 1307 (50.5) | 2586        |         |
| Age (years, mean ± SD) (n=2586)                                       | 12.5 ± 0.5                              | 12.4 ± 0.5  | 12.4 ± 0.5  | <0.001  |
| 12 years, n (%)                                                       | 651 (50.9)                              | 775 (59.3)  | 1426 (55.1) | <0.001  |
| 13 years, n (%)                                                       | 628 (49.1)                              | 532 (40.7)  | 1160 (44.9) |         |
| Height (cm, mean ± SD) (n=2440)                                       | 161.1±9.5                               | 160.1±7.3   | 160.6 ± 8.4 | 0.003   |
| Weight (kg, mean ± SD) (n=2360)                                       | 49.5 ± 10.9                             | 47.0 ± 8.9  | 48.3 ± 10.0 | <0.001  |
| BMI* (kg/m <sup>2</sup> , mean ± SD) (n=2296)                         | 18.9 ± 3.1                              | 18.3 ± 2.7  | 18.6 ± 2.9  | <0.001  |
| BMI range                                                             | 11.8 – 30.9                             | 11.7 – 33.8 | 11.7 – 33.8 |         |
| Underweight (BMI <10 <sup>th</sup> percentile)**                      | 126 (11.1)                              | 218 (18.8)  | 344 (15.0)  | <0.001  |
| Normal weight (BMI 10 <sup>th</sup> - <90 <sup>th</sup> percentile)** | 822 (72.2)                              | 843 (72.6)  | 1665 (72.4) |         |
| Overweight (BMI 90 <sup>th</sup> - <97 <sup>th</sup> percentile)**    | 166 (14.6)                              | 90 (7.8)    | 256 (11.1)  |         |
| Obesity (BMI ≥97 <sup>th</sup> percentile)**                          | 24 (2.1)                                | 10 (0.9)    | 34 (1.5)    |         |
| Migrant background (n=2423)                                           | 396 (33.1)                              | 429 (35.0)  | 825 (34.0)  | 0.307   |
| Individual SES*** (family affluence scale; FAS) (n=2139)              |                                         |             |             |         |
| high (FAS 6-7)                                                        | 569 (53.7)                              | 500 (46.3)  | 1069 (50.0) | 0.003   |
| moderate (FAS 4-5)                                                    | 371 (35.0)                              | 441 (40.9)  | 812 (38.0)  |         |
| low (FAS 0-3)                                                         | 120 (11.3)                              | 138 (12.8)  | 258 (12.1)  |         |
| Students' neighbourhood SES (n=2240)                                  | 1114                                    | 1126        | 2240        |         |
| Mean±SD                                                               | 4.0 ± 1.9                               | 4.1 ± 1.9   | 4.0 ± 1.9   | 0.526   |
| 1 (best)                                                              | 127 (11.4)                              | 123 (10.9)  | 250 (11.2)  |         |
| 2                                                                     | 182 (16.3)                              | 194 (17.2)  | 376 (16.8)  |         |
| 3                                                                     | 143 (12.8)                              | 119 (10.6)  | 262 (11.7)  |         |
| 4                                                                     | 215 (19.3)                              | 229 (20.3)  | 444 (19.8)  |         |
| 5                                                                     | 162 (14.5)                              | 160 (14.2)  | 322 (14.4)  |         |
| 6                                                                     | 134 (12.0)                              | 134 (11.9)  | 268 (12.0)  |         |
| 7 (worst)                                                             | 151 (13.6)                              | 167 (14.8)  | 318 (14.2)  |         |
| School type (n=2586)                                                  |                                         |             |             |         |
| High School <sup>a</sup> students (15 schools)                        | 507 (39.6)                              | 624 (47.7)  | 1131 (43.7) | <0.001  |
| Integrated Secondary School <sup>b</sup> students (32 schools)        | 772 (60.4)                              | 683 (52.3)  | 1455 (56.3) |         |

(descriptive statistical methods)

\*Body Mass Index (kg/m<sup>2</sup>)

\*\* BMI percentiles according to Cole et al. (46,47)

\*\*\* Socioeconomic Status

<sup>a</sup> High schools (5<sup>th</sup> or 7<sup>th</sup> grade to 12<sup>th</sup> grade, graduation with high school diploma after 12<sup>th</sup> grade)

<sup>b</sup> Integrated secondary schools (integration of different school types, 7<sup>th</sup> grade to 13<sup>th</sup> grade, graduation with secondary school leaving certificate after 10<sup>th</sup> grade or high school diploma after 13<sup>th</sup> grade)

**Table 1b: Characteristics of schools**

| School level                                           |                           |                                           |           |        |
|--------------------------------------------------------|---------------------------|-------------------------------------------|-----------|--------|
|                                                        | High Schools <sup>a</sup> | Integrated Secondary Schools <sup>b</sup> | Total     |        |
| School neighbourhood SES, Mean±SD (n=47)               | 3.5±1.4                   | 4.4±1.9                                   | 4.0±1.8   | <0.001 |
| n (%)                                                  |                           |                                           |           |        |
| 1 (best)                                               | 1 (6.7)                   | 3 (9.4)                                   | 4 (8.5)   |        |
| 2                                                      | 4 (26.7)                  | 3 (9.4)                                   | 7 (14.9)  |        |
| 3                                                      | 2 (13.3)                  | 4 (12.5)                                  | 6 (12.8)  |        |
| 4                                                      | 4 (26.7)                  | 7 (21.9)                                  | 11 (23.4) |        |
| 5                                                      | 2 (13.3)                  | 4 (12.5)                                  | 6 (12.8)  |        |
| 6                                                      | 2 (13.3)                  | 5 (15.6)                                  | 6 (12.8)  |        |
| 7 (worst)                                              | 0 (0.0)                   | 6 (18.8)                                  | 6 (12.8)  |        |
| Students' neighbourhood SES*, Mean±SD (n=2240)         | 3.1±1.6                   | 4.6±1.9                                   |           | <0.001 |
| Individual SES* (family affluence scale; FAS) (n=2139) |                           |                                           |           |        |
| n (%)                                                  |                           |                                           |           |        |
| High (FAS 6-7)                                         | 744 (65.8)                | 531 (36.5)                                |           | <0.001 |
| Moderate (FAS 4-5)                                     | 338 (29.9)                | 652 (44.8)                                |           |        |
| Low (FAS 0-3)                                          | 49 (4.3)                  | 272 (18.7)                                |           |        |

(descriptive statistical methods)

SES: Socioeconomic Status, SD: Standard deviation

<sup>a</sup>High schools (5<sup>th</sup> or 7<sup>th</sup> grade to 12<sup>th</sup> grade, graduation with high school diploma after 12<sup>th</sup> grade)

<sup>b</sup>Integrated secondary schools (integration of different school types, 7<sup>th</sup> grade to 13<sup>th</sup> grade, graduation with secondary school leaving certificate after 10<sup>th</sup> grade or high school diploma after 13<sup>th</sup> grade)

### Association of individual and neighbourhood SES with PA and ST

Results of multivariable analyses are presented in figure 2 and figure 3. These results presented in figures 2 and 3 and in supplement table 1 and supplement table 2 are based on an identical analysis population with complete information (n=1523). Results for the multivariable analysis not restricted to complete cases is additionally presented in supplement table 3 and supplement table 4. The results did not differ markedly between both approaches.



1  
2  
3 In multivariable analyses individual SES was not associated with PA. The ORs after adjustment for  
4 individual factors were 0.90 [0.63;1.29] and 0.85 [0.48;1.52];  $p=0.792$  for middle and low SES, re-  
5 spectively, compared to high SES. Additional adjustment for school type and school neighbourhood  
6 SES did not change the results notably (0.83 [0.58;1.20] and 0.74 [0.41;1.33];  $p=0.476$ ). ST in contrast  
7 was associated with individual SES. The lower the students' SES the higher the odds to spend more  
8 than two hours of ST per day (1.31 [1.00;1.72] and 2.08 [1.26;3.43];  $p=0.008$ ) for middle and low  
9 individual SES, respectively, compared to high SES. This association was attenuated slightly when  
10 additionally adjusting for school variables (1.25 [0.95;1.64] and 1.88 [1.12;3.14];  $p=0.036$ ).

11  
12  
13 In contrast to individual SES, a lower neighbourhood SES was associated with a higher odds of engag-  
14 ing in 60 minutes per day in PA (1.34 [0.86;2.08] and 1.76 [1.12;2.75];  $p=0.047$ ) for middle and low  
15 neighbourhood SES, respectively, compared to high neighbourhood SES after adjustment for individ-  
16 ual factors; after adjustment for school variables, the association of neighbourhood SES with PA was  
17 attenuated somewhat and no longer independently associated (OR 1.19 [0.78;1.82] and 1.51  
18 [0.93;2.46];  $p=0.253$ ).

19  
20  
21 Compared with high neighbourhood SES, students with low neighbourhood SES were more likely to  
22 spend more than two hours of ST per day (OR 1.54 [1.10;2.17]), while there was no association for  
23 students with middle neighbourhood SES (1.03 [0.75;1.41];  $p=0.019$ ). When additionally adjusting for  
24 school variables, neighbourhood SES was no longer independently associated with ST and the OR of  
25 middle and low neighbourhood SES, compared to high neighbourhood SES, became almost equal  
26 (1.37 [0.99;1.91] and 1.40 [0.98;2.00];  $p=0.109$ ). There was no interaction effect between gender and  
27 ST regarding PA, nor between gender and PA regarding ST (data not shown).

## 28 29 30 31 32 33 34 35 36 37 38 39 40 41 42 43 44 45 46 47 48 **DISCUSSION**

49  
50 In this study we investigated the association of individual and neighbourhood SES with PA and ST  
51 among 7<sup>th</sup> grade school students. The individual SES of the students in our study sample, measured  
52 with the family affluence scale, was significantly associated with ST. Students with lower SES were  
53 more likely to spend more than 2 hours per day viewing screen devices. Compared to high SES, low  
54 SES was more strongly associated with ST than middle SES. Similar results were found in other stud-  
55  
56  
57  
58  
59  
60

1  
2  
3 ies(16,48,49). Potential reasons for these findings are that parents with better education and higher  
4 statuses may be more aware of the health consequences of excessive ST and thus have stricter rules  
5 regarding ST behaviour(50). Children from families with lower socioeconomic status may also more  
6 often have a TV in their room, which has been shown to be associated with higher ST levels(51).  
7 Moreover, it is well known that parents have an important role-modelling function, which influences  
8 children's behaviours, such as screen viewing(52). Since children of families with lower SES may  
9 more often have parents that engage in higher ST and/or watch more often TV together with their par-  
10 ents, they may in turn engage in more ST(53).

11  
12 PA on the other hand was not associated with individual SES in our study population. This finding is  
13 in part consistent with the results of the HBSC study for Germany and with a few other  
14 studies(8,54,55). A possible explanation for this finding is that PA consists not only of organised  
15 sports or activities that require a club membership or sports equipment. On the contrary, a large part of  
16 PA among youths may be daily life activities, such as active commuting, or sports and activities in the  
17 neighbourhood and in parks which is independent from the individual SES(56). However, in contrast  
18 to our findings and the other studies, a variety of studies do show an association between socioeco-  
19 nomic status and PA, which has been highlighted in reviews by Sallis et al or Hanson et al(57,58). It  
20 should be noted that most of these studies are from the US or Australia and the explanations for the  
21 observed associations, such as the higher prevalence of unsafe neighbourhoods or of neighbourhoods  
22 with less green space may not be directly transferable to Germany and Berlin.

23  
24 The other main aspect of our study was the investigation of the neighbourhood SES and its association  
25 with PA and ST. The neighbourhood SES represents the social and health indicators of a city or of its  
26 districts including unemployment rate, welfare reception rate, average per capita income and others. In  
27 our study, students living in low SES neighbourhood areas were more likely to be physically active  
28 than those with middle or high neighbourhood SES. To a certain extent this is surprising and in con-  
29 trast to many earlier studies that have reported mostly no or inverse associations between neighbour-  
30 hood SES and PA(28,59–62). However, as suggested in an earlier study the observed finding in our  
31 study may be related to higher active transportation among adolescents of families with lower SES  
32 because they may be less likely to own a car resulting in more students using the bicycle or public  
33  
34  
35  
36  
37  
38  
39  
40  
41  
42  
43  
44  
45  
46  
47  
48  
49  
50  
51  
52  
53  
54  
55  
56  
57  
58  
59  
60

1  
2  
3 transportation to school(63). Similar to individual SES, another explication could be that the major  
4 part of PA among adolescents consists of unstructured activities rather than organised team sports(56).  
5  
6 Thus, a membership in a sports club (which is less probable in neighbourhoods with lower SES)  
7  
8 would not affect the overall amount of PA.  
9

10  
11 Low and middle neighbourhood SES were also associated with higher ST compared to high neigh-  
12 bourhood SES. This result is in line with a study by Carson et al(64). Neighbourhood safety, as sug-  
13 gested by Carson et al, may be one possible explanation for this finding. In addition, the lack of suita-  
14 ble and well-maintained recreation facilities could lead to more ST as replacement of other leisure  
15 time activities. In contrast to our results, many studies investigating neighbourhood SES and its asso-  
16 ciation with sedentary behaviour reported null results as shown in a recent review by Stierlin et al.,  
17 suggesting that other factors may be more important than neighbourhood SES in the context of adoles-  
18 cents' sedentary behaviour(30). Possible reasons for these differences between findings may be related  
19 to different study populations across individual studies but also the fact that our study only focussed  
20 on ST instead of total sedentary behaviour. Screen viewing as a health behaviour has not been investi-  
21 gated widely in the context of individual and neighbourhood SES, but it appears that in Berlin it is  
22 more closely linked with these factors than PA. Hence, promoting alternative activity opportunities for  
23 adolescents living in lower SES neighbourhoods could be a worthwhile target for interventions. In the  
24 context of the existing literature, it would be useful to also investigate total sedentary behaviour in  
25 future German studies.  
26  
27  
28  
29  
30  
31  
32  
33  
34  
35  
36  
37  
38  
39  
40

41 In addition to individual and neighbourhood SES, school level factors play a role in the health behav-  
42 iour of school children(65). Moore et al found that school level affluence was independently associat-  
43 ed with health behaviours (except physical activity) of the school students after adjusting for the indi-  
44 vidual SES(66). When additionally including school type and school neighbourhood SES as covariates  
45 in our analysis, presented results for PA and ST were attenuated somewhat and neighbourhood SES  
46 was no longer independently associated with PA and ST, indicating the potentially important role of  
47 school type and school neighbourhood SES on PA and ST.  
48  
49  
50  
51  
52  
53  
54

55 A possible explanation for this finding could be that adolescents living in areas with lower neighbour-  
56 hood SES are more often attending an integrated secondary school which has been shown in table 1b.  
57  
58  
59  
60

1  
2  
3 Since the academic standards of integrated secondary schools tend to be lower than those of high  
4 schools, it is possible that students of the first-mentioned have more leisure time than those of the lat-  
5 ter(67,68).  
6  
7

8  
9 Some studies found that the school socioeconomic environment i.e. social networks and peer influ-  
10 ences had a greater effect on health behaviour among adolescents than the individual SES(66,69). This  
11 illustrates the complex interplay of individual SES, neighbourhood SES, and the school environment  
12 (school type and school neighbourhood SES), that may also be affected by parental choice of schools  
13 and other parental influences on school activities(70). A recent study from the UK has provided some  
14 further evidence for these complex relationships(66). Studies from Germany have also shown that the  
15 neighbourhood SES as well as the SES of the students tends to be correlated with the school type(71).  
16 Better educated parents tend to send their children to high schools rather than integrated secondary  
17 schools(72), which could imply that it is not only the school type itself influencing PA and ST, but the  
18 social environment of the student. But even if the choice of the school type is done by the parents and  
19 is influenced by their SES, targeting integrated secondary schools may be important and could be em-  
20 phasized more in health promotion activities. It appears that this may help to address the issue of indi-  
21 vidual SES on the one hand (more children with low SES in secondary schools) but also neighbour-  
22 hood SES on the other hand. Further research is needed to disentangle these complex relationships  
23 between individual and neighbourhood SES, as well as school environment. With additional research  
24 it could be investigated if some neighbourhoods might benefit more from screen time related activi-  
25 ties, while others might benefit more from PA related activities. The aim should be the ability to target  
26 the content of health promotion activities according to school type and neighbourhood to meet greatest  
27 needs.  
28  
29  
30  
31  
32  
33  
34  
35  
36  
37  
38  
39  
40  
41  
42  
43  
44  
45  
46

47 In addition to individual and neighbourhood SES, other factors like the built environment (i.e. number  
48 of public transport stops, residential density, intersection density and the number of parks) could also  
49 play an important role in adolescents' health behaviours(73). These factors may be mediators of the  
50 observed associations but studies have also suggested that associations may be moderated by the built  
51 environment (studies have shown that individuals with low neighbourhood SES had a greater benefit  
52 of good walkability than those with a high neighbourhood SES)(31,32). Future research should there-  
53  
54  
55  
56  
57  
58  
59  
60

1  
2  
3 fore also include measurements of the built environment in Berlin to provide new insights into the  
4  
5 associations with PA.  
6  
7

### 8 9 **Strengths and limitations**

10  
11 Strengths of our study include the size of our sample, as well as the proportion of students with migra-  
12  
13 tion background, socioeconomic status and gender distribution, which appear to be very similar to the  
14  
15 student population of Berlin(74). However, the results are only valid for regions with similar charac-  
16  
17 teristics as Berlin: an urban well-connected region with relatively safe neighbourhoods and good infra-  
18  
19 structure for transportation and cycling.  
20

21  
22 Some limitations have to be considered as well. First, FAS was only assessed at the 24 month follow  
23  
24 up. However, we assessed one item of the FAS (holiday) additionally at baseline and at the 12 month  
25  
26 follow-up. The answers were quite similar over the two years. We thus think that the period of two  
27  
28 years was not associated with major changes in the FAS level. We also found differences in the self-  
29  
30 report FAS of boys and girls, which is somewhat surprising. It is possible that the structure of the  
31  
32 questionnaire led to an overestimation among boys due to a higher interest in cars and computers (i.e.  
33  
34 two key elements of the FAS). Second, PA was not measured objectively. Self-report of children and  
35  
36 adolescents, especially regarding PA, may lead to biased results through misreporting(75). Measure-  
37  
38 ment errors associated with self-report may further be influenced by SES of adolescents(76). Future  
39  
40 studies should use accelerometers or other means to objectively measure PA and sedentary  
41  
42 behaviour(77). Another limitation of our study is that we did not assess total sedentary behaviour and  
43  
44 that ST was determined based on the use of TV, Computer and video games as assessed by the HBSC  
45  
46 questionnaire(35,78). Other increasingly popular screen devices (e.g. smartphones, tablets) and other  
47  
48 kinds of sedentary behaviours like sitting during homework, talking on the phone and sitting at school  
49  
50 were not taken into account, which may have led to an underestimation of ST.  
51  
52  
53

### 54 55 **CONCLUSION**

56  
57 Lower individual and neighbourhood SES was associated with higher ST. Lower neighbourhood but  
58  
59 not individual SES was associated with higher PA. After consideration of school type and school  
60

1  
2  
3 neighbourhood SES associations were attenuated and became insignificant for the relationship be-  
4  
5 tween neighbourhood SES, PA and ST. Further research is warranted to unravel the complex relation-  
6  
7 ships between individual SES, neighbourhood SES and school environment to develop more targeted  
8  
9 health promotion strategies in the future.

## 10 11 12 13 14 15 **ACKNOWLEDGEMENTS**

16  
17  
18 The authors thank the Berlin City Council (Senatsverwaltung für Bildung, Jugend und Wissenschaft,  
19  
20 Berlin) and the participating schools, teachers and students for supporting the project.

## 21 22 23 24 **CONTRIBUTORS**

25  
26 LK and FMR drafted the manuscript with intellectual input from SR, NR, JMN, and NSB. FMR su-  
27  
28 pervised the study and LK carried out the data collection and parts of the data analysis. FL and SR  
29  
30 were responsible for data assessment and statistical analyses, FMR, CB, NR, JMN and NSB were re-  
31  
32 sponsible for the design of the recruitment methods and the assessment tools, FMR, NR, JMN, and  
33  
34 SW conceptualized the study. All authors read and approved the final manuscript.

## 35 36 37 **FUNDING**

38  
39 This work was supported by ‘The German Cancer Aid (Deutsche Krebshilfe e.V.)’.

## 40 41 42 **COMPETING INTERESTS**

43  
44 None declared.

## 45 46 47 48 **ETHICS APPROVAL**

49  
50 The study was approved by the ethical review committee of the Charité-Universitätsmedizin Berlin,  
51  
52 Germany.

## 53 54 55 56 **DATA SHARING STATEMENT**

57  
58 No additional data available.

**REFERENCES**

1. WHO. Global health risks. 2009.
2. Ferreira de Moraes AC, Carvalho HB, Siani A, Barba G, Veidebaum T, Tornaritis M, et al. Incidence of high blood pressure in children - Effects of physical activity and sedentary behaviors: The IDEFICS study: High blood pressure, lifestyle and children. *Int J Cardiol*. Elsevier Ireland Ltd; 2014 Nov 26;180C:165–70.
3. Danielsen YS, Júlíusson PB, Nordhus IH, Kleiven M, Meltzer HM, Olsson SJG, et al. The relationship between life-style and cardio-metabolic risk indicators in children: the importance of screen time. *Acta Paediatr*. 2011 Feb;100(2):253–9.
4. Fernandes HM. Physical activity levels in Portuguese adolescents: A 10-year trend analysis (2006-2016). *J Sci Med Sport*. Sports Medicine Australia; 2017;(Epub ahead of print).
5. Bucksch J, Sigmundova D, Hamrik Z, Troped PJ, Melkevik O, Ahluwalia N, et al. International Trends in Adolescent Screen-Time Behaviors from 2002 to 2010. *J Adolesc Heal*. Elsevier Inc.; 2016;58(4):417–25.
6. Sigmund E, Sigmundova D, Badura P, Kalman M, Hamrik Z, Pavelka J. Temporal trends in overweight and obesity, physical activity and screen time among Czech adolescents from 2002 to 2014: A national health behaviour in school-aged children study. *Int J Environ Res Public Health*. 2015;12(9):11848–68.
7. Loprinzi PD, Davis RE. Recent Temporal Trends in Parent-Reported Physical Activity in Children in the United States, 2009 to 2014. *Mayo Clin Proc*. 2016;91(4):477.481.
8. Currie C, Gabhainn A, Godeau E, Roberts C, Smith R, Currie D, et al. Health Policy for Children and Adolescents, No. 5 - Inequalities in Young People's Health. 2006.
9. Jago R, Solomon-Moore E, Macdonald-Wallis C, Sebire SJ, Thompson JL, Lawlor DA. Change in children's physical activity and sedentary time between Year 1 and Year 4 of primary school in the B-PROACTIV cohort. *Int J Behav Nutr Phys Act*. International Journal of Behavioral Nutrition and Physical Activity; 2017;14(1):33.



- 1  
2  
3 10. Lau EY, Dowda M, McIver KL, Pate RR. Changes in Physical Activity in the School,  
4  
5 Afterschool, and Evening Periods During the Transition From Elementary to Middle School. *J*  
6  
7 *Sch Health*. 2017;87(7):531–7.
- 8  
9 11. Verloigne M, Van Lippevelde W, Maes L, Yildirim M, Chinapaw M, Manios Y, et al. Self-  
10  
11 reported TV and computer time do not represent accelerometer-derived total sedentary time in  
12  
13 10 to 12-year-olds. *Eur J Public Health*. 2013;23(1):30–2.
- 14  
15 12. Gorely T, Marshall SJ, Biddle SJH, Cameron N. Patterns of sedentary behaviour and physical  
16  
17 activity among adolescents in the United Kingdom: Project STIL. *J Behav Med*.  
18  
19 2007;30(6):521–31.
- 20  
21 13. Bringolf-Isler B, Mäder U, Dössegger A, Hofmann H, Puder JJ, Braun-Fahrländer C, et al.  
22  
23 Regional differences of physical activity and sedentary behaviour in Swiss children are not  
24  
25 explained by socio-demographics or the built environment. *Int J Public Health*.  
26  
27 2015;60(3):291–300.
- 28  
29 14. Gorely T, Atkin AJ, Biddle SJ, Marshall SJ. Family circumstance, sedentary behaviour and  
30  
31 physical activity in adolescents living in England: Project STIL. *Int J Behav Nutr Phys Act*.  
32  
33 2009;6:33.
- 34  
35 15. Stone MR, Faulkner GE, Mitra R, Buliung RN. The freedom to explore: examining the  
36  
37 influence of independent mobility on weekday, weekend and after-school physical activity  
38  
39 behaviour in children living in urban and inner-suburban neighbourhoods of varying  
40  
41 socioeconomic status. *Int J Behav Nutr Phys Act*. 2014 Jan;11:5.
- 42  
43 16. Hanson MD, Chen E. Socioeconomic status and health behaviors in adolescence: A review of  
44  
45 the literature. *J Behav Med*. 2007;30(3):263–85.
- 46  
47 17. Kurth B-M, Schaffrath Rosario A. The prevalence of overweight and obese children and  
48  
49 adolescents living in Germany. Results of the German Health Interview and Examination  
50  
51 Survey for Children and Adolescents (KiGGS). *Bundesgesundheitsblatt Gesundheitsforschung*  
52  
53 *Gesundheitsschutz*. 2007;50:736–43.
- 54  
55 18. Kuntz B, Lampert T. How healthy is the lifestyle of adolescents in Germany?  
56  
57 *Gesundheitswesen*. 2013;75:67–76.
- 58  
59  
60



19. Gose M, Plachta-Danielzik S, Willié B, Johannsen M, Landsberg B, Müller MJ. Longitudinal influences of neighbourhood built and social environment on children's weight status. *Int J Environ Res Public Health*. 2013;10(10):5083–96.
20. Suglia SF, Shelton RC, Hsiao A, Wang YC, Rundle A, Link BG. Why the Neighborhood Social Environment Is Critical in Obesity Prevention. *J Urban Heal*. 2016;93(1):206–12.
21. Mitchell CA, Clark AF, Gilliland JA. Built Environment Influences of Children's Physical Activity: Examining Differences by Neighbourhood Size and Sex. *Int J Environ Res Public Health*. 2016;13(130).
22. McNeill LH, Kreuter MW, Subramanian S V. Social Environment and Physical activity: A review of concepts and evidence. *Soc Sci Med*. 2006;63(4):1011–22.
23. Ding D, Sallis JF, Kerr J, Lee S, Rosenberg DE. Neighborhood Environment and Physical Activity Among Youth. *Am J Prev Med*. Elsevier Inc.; 2011;41(4):442–55.
24. Ross CE, Mirowsky J. Neighborhood Disadvantage, Disorder, and Health. *J Health Soc Behav*. 2001;42(3):258–76.
25. Cubbin C, Hadden WC, Winkleby MA. Neighborhood Context and Cardiovascular Disease Risk Factors: The Contribution of Material Deprivation. *Ethnicity&Disease*. 2001;11:687–700.
26. Janssen I. Crime and perceptions of safety in the home neighborhood are independently associated with physical activity among 11-15year olds. *Prev Med (Baltim)*. Elsevier B.V.; 2014;66:113–7.
27. Dragano N, Bobak M, Wege N, Peasey A, Verde PE, Kubinova R, et al. Neighbourhood socioeconomic status and cardiovascular risk factors: a multilevel analysis of nine cities in the Czech Republic and Germany. *BMC Public Health*. 2007;7:255.
28. Bürgi R, Tomatis L, Murer K, de Bruin ED. Spatial physical activity patterns among primary school children living in neighbourhoods of varying socioeconomic status: a cross-sectional study using accelerometry and Global Positioning System. *BMC Public Health*. *BMC Public Health*; 2016;16(1):282.
29. Kavanagh AM, Goller JL, King T, Jolley D, Crawford D, Turrell G. Urban area disadvantage and physical activity: a multilevel study in Melbourne, Australia. *J Epidemiol Community*

- 1  
2  
3 Health. 2005;59(11):934–40.  
4  
5 30. Stierlin AS, De Lepeleere S, Cardon G, Dargent-Molina P, Hoffmann B, Murphy MH, et al. A  
6 systematic review of determinants of sedentary behaviour in youth: a DEDIPAC- study. *Int J*  
7 *Behav Nutr Phys Act.* 2015;12(133):1–19.  
8  
9 31. De Meester F, Van Dyck D, De Bourdeaudhuij I, Deforche B, Sallis JF, Cardon G. Active  
10 living neighborhoods: is neighborhood walkability a key element for Belgian adolescents?  
11 *BMC Public Health.* BioMed Central Ltd; 2012;12(1):7.  
12  
13 32. Bringolf-Isler B, Kriemler S, Mäder U, Dössegger A, Hofmann H, Puder JJ, et al. Relationship  
14 between the objectively-assessed neighborhood area and activity behavior in Swiss youth. *Prev*  
15 *Med Reports.* Elsevier B.V.; 2014;1:14–20.  
16  
17 33. Krist L, Lotz F, Bürger C, Ströbele-Benschop N, Roll S, Rieckmann N, et al. Long-term  
18 effectiveness of a combined student-parent and a student-only smoking prevention intervention  
19 among 7th grade school children in Berlin, Germany. *Addiction.* 2016;111(12):2219–29.  
20  
21 34. Müller-Riemenschneider F, Krist L, Bürger C, Ströbele-Benschop N, Roll S, Rieckmann N, et  
22 al. Berlin evaluates school tobacco prevention - BEST prevention: study design and  
23 methodology. *BMC Public Health.* 2014 Jan;14(1):871.  
24  
25 35. Ottova V, Hillebrandt D, Kolip P, Hoffarth K, Bucksch J, Melzer W, et al. The HBSC Study in  
26 Germany – Study Design and Methodology. *Gesundheitswesen.* 2012;74(Suppl 1):S8-14.  
27  
28 36. Opper E, Worth A, Wagner M, Bös K. The module „Motorik“ in the German Health Interview  
29 and Examination Survey for Children and Adolescents (KiGGS). Motor Fitness and physical  
30 activity of children and young people. *Bundesgesundheitsblatt Gesundheitsforschung*  
31 *Gesundheitsschutz.* 2007;50:879–88.  
32  
33 37. WHO. Global Recommendations on Physical Activity for Health. 2010 p. 60.  
34  
35 38. American Academy of Pediatrics. Children, Adolescents, and Television. *Pediatrics.* 2001 Feb  
36 1;107(2):423–6.  
37  
38 39. Cole TJ, Flegal KM, Nicholls D, Jackson A a. Body mass index cut offs to define thinness in  
39 children and adolescents: international survey. *BMJ.* 2007 Jul 28;335(7612):194.  
40  
41 40. Cole TJ, Bellizzi MC, Flegal KM, Dietz WH. Establishing a standard definition for child  
42  
43  
44  
45  
46  
47  
48  
49  
50  
51  
52  
53  
54  
55  
56  
57  
58  
59  
60

- 1  
2  
3 overweight and obesity worldwide: international survey. *BMJ*. 2000;320:1240.  
4  
5 41. Bundesministerium der Justiz. Verordnung zur Erhebung der Merkmale des  
6  
7 Migrationshintergrundes (Migrationshintergrund- Erhebungsverordnung - MighEV ). 2010.  
8  
9 42. Currie CE, Elton RA, Todd J, Platt S. Indicators of socioeconomic status for adolescents : the  
10  
11 WHO Health Behaviour in School-aged Children Survey. *Health Educ Res*. 1997;12(3):385–  
12  
13 97.  
14  
15 43. Senatsverwaltung für Gesundheit und Soziales. Handlungsorientierter Sozialstrukturatlas  
16  
17 Berlin 2013. 2013.  
18  
19 44. Senatsverwaltung für Gesundheit Umwelt und Verbraucherschutz.  
20  
21 Gesundheitsberichterstattung Berlin - Spezialbericht Sozialstrukturatlas Berlin 2008. 2008.  
22  
23 45. Institut für Schulqualität der Länder Berlin und Brandenburg. Bildung in Berlin und  
24  
25 Brandenburg 2010. 2010.  
26  
27 46. Cole TJ, Bellizzi MC, Flegal KM, Dietz WH. Establishing a standard definition for child  
28  
29 overweight and obesity worldwide: international survey. *BMJ*. 2000;320(1240):1–6.  
30  
31 47. Cole TJ, Flegal KM, Nicholls D, Jackson AA. Body mass index cut offs to define thinness in  
32  
33 children and adolescents: international survey. *BMJ*. 2007;335(7612):194.  
34  
35 48. Lewis L, Maher C, Katzmarzyk P, Olds T. Individual and School-Level Socioeconomic  
36  
37 Gradients in Physical Activity in Australian Schoolchildren. *J Sch Health*. 2016;86(2):105–12.  
38  
39 49. Lampinen EK, Eloranta AM, Haapala EA, Lindi V, Väistö J, Lintu N, et al. Physical activity,  
40  
41 sedentary behaviour, and socioeconomic status among Finnish girls and boys aged 6–8 years.  
42  
43 *Eur J Sport Sci*. 2017;17(4):462–72.  
44  
45 50. Määttä S, Kaukonen R, Vepsäläinen H, Lehto E, Ylönen A, Ray C, et al. The mediating role of  
46  
47 the home environment in relation to parental educational level and preschool children’s screen  
48  
49 time: a cross-sectional study. *BMC Public Health*. *BMC Public Health*; 2017;17(688):1–11.  
50  
51 51. Dumuid D, Olds TS, Lewis LK, Maher C. Does home equipment contribute to socioeconomic  
52  
53 gradients in Australian children’s physical activity, sedentary time and screen time ? *BMC*  
54  
55 *Public Health*. *BMC Public Health*; 2016;16(736):1–8.  
56  
57 52. Brindova D, Pavelka J, Ševčíková A, Žežula I, van Dijk JP, Reijneveld SA, et al. How parents  
58  
59  
60

- 1  
2  
3 can affect excessive spending of time on screen-based activities. BMC Public Health [Internet].  
4  
5 2014;14(1):1261.  
6  
7 53. Tandon PS, Zhou C, Sallis JF, Cain KL, Frank LD, Saelens BE, et al. Home environment  
8  
9 relationships with children's physical activity, sedentary time, and screen time by  
10  
11 socioeconomic status. *Int J Behav Nutr Phys Act*. 2012;9(88):1–9.  
12  
13 54. Ortlieb S, Schneider G, Koletzko S, Berdel D, Berg A Von, Bauer C, et al. Physical activity  
14  
15 and its correlates in children : a cross-sectional study (the GINIplus & LISApplus studies). *BMC*  
16  
17 *Public Heal*. 2013;13(349):1–14.  
18  
19 55. Barr-Anderson DJ, Flynn JI, Dowda M, Taverno Ross SE, Schenkelberg MA, Reid LA, et al.  
20  
21 The Modifying Effects of Race/Ethnicity and Socioeconomic Status on the Change in Physical  
22  
23 Activity From Elementary to Middle School. *J Adolesc Heal*. Elsevier Inc.; 2017;(Epub ahead  
24  
25 of print).  
26  
27 56. Schott K, Hunger M, Lampert T, Spengler S, Mess F, Mielck A. Social Differences in Physical  
28  
29 Activity among Adolescents in Germany: Analyses Based on Information Concerning the  
30  
31 Metabolic Equivalent of Task (MET). *Gesundheitswesen*. 2016;78:630–6.  
32  
33 57. Hanson MD, Chen ÆE. Socioeconomic Status and Health Behaviors in Adolescence : A  
34  
35 Review of the Literature. 2007;263–85.  
36  
37 58. Sallis JF, Prochaska JJ, Taylor WC. A review of correlates of physical activity. *Med Sci Sports*  
38  
39 *Exerc*. 2000;32(5):963–75.  
40  
41 59. Voorhees CC, Catellier DJ, Carolina N, Hill C, Cohen DA, Dowda M. Neighborhood  
42  
43 Socioeconomic Status and Non School Physical Activity and Body Mass Index in Adolescent  
44  
45 Girls. *J Phys Act Heal*. 2009;6(6):731–40.  
46  
47 60. Turrell G, Haynes M, Burton NW, Giles-Corti B, Oldenburg B, Wilson LA, et al.  
48  
49 Neighborhood Disadvantage and Physical Activity: Baseline Results from the HABITAT  
50  
51 Multilevel Longitudinal Study. *Ann Epidemiol*. Elsevier Inc; 2010;20(3):171–81.  
52  
53 61. Molina-García J, Queralt A, Adams MA, Conway TL, Sallis JF. Neighborhood built  
54  
55 environment and socio-economic status in relation to multiple health outcomes in adolescents.  
56  
57 *Prev Med (Baltim)*. Elsevier Inc; 2017;(doi: 10.1016/j.ypmed.2017.08.026).  
58  
59  
60

- 1  
2  
3 62. Kim Y, Cubbin C. The role of neighborhood economic context on physical activity among  
4 children: Evidence from the Geographic Research on Wellbeing (GROW) study. *Prev Med*  
5 (Baltim). Elsevier Inc.; 2017;101:149–55.  
6  
7  
8  
9 63. Cutumisu N, Bélanger-Gravel A, Laferté M, Lagarde F, Lemay JF, Gauvin L. Influence of area  
10 deprivation and perceived neighbourhood safety on active transport to school among urban  
11 Quebec preadolescents. *Can J Public Heal.* 2014;105(5):e376–82.  
12  
13  
14  
15 64. Carson V, Spence JC, Cutumisu N, Cargill L. Association between neighborhood  
16 socioeconomic status and screen time among pre-school children: a cross-sectional study. *BMC*  
17 *Public Health.* 2010;10(367):17–9.  
18  
19  
20  
21 65. Saab H, Klinger D. Social Science & Medicine School differences in adolescent health and  
22 wellbeing: Findings from the Canadian Health Behaviour in School-aged Children Study. *Soc*  
23 *Sci Med.* Elsevier Ltd; 2010;70(6):850–8.  
24  
25  
26  
27 66. Moore GF, Littlecott HJ. School- and family-level socioeconomic status and health behaviors:  
28 multilevel analysis of a national survey in Wales. *United Kingdom J Sch Heal.*  
29 2015;85(4):267–75.  
30  
31  
32  
33 67. Senatsverwaltung für Bildung Jugend und Familie. Auf Kurs zum Abitur - Wegweiser für die  
34 gymnasiale Oberstufe Schuljahr 2017/2018. 2017.  
35  
36  
37 68. Bezirksamt Pankow von Berlin. Weiterführende Schulen im Bezirk Pankow Schuljahr 2017 /  
38 2018. 2016.  
39  
40  
41 69. Salvy S, Miles JN V, Shih RA, Tucker JS, Amico EJD. Neighborhood , Family and Peer-Level  
42 Predictors of Obesity-Related Health Behaviors Among Young Adolescents. *J Pediatr Psychol.*  
43 2017;42(September):153–61.  
44  
45  
46  
47 70. Green K. Extra □ Curricular Physical Education in England and Wales : A Sociological  
48 Perspective on a Sporting Bias. *Eur J Phys Educ.* 2000;5:179–207.  
49  
50  
51 71. Robert Koch-Institut. Gesundheitsberichterstattung des Bundes. Vol. 21,  
52 Lebensphasenspezifische Gesundheit von Kindern und Jugendlichen in Deutschland -  
53 Ergebnisse des Nationalen Kinder- und Jugendgesundheitssurveys (KiGGS). 2004.  
54  
55  
56  
57 72. Nold D. Sozioökonomischer Status von Schülerinnen und Schülern 2008. Ergebnisse des  
58  
59  
60

- 1  
2  
3 Mikrozensus. *Wirtsch Stat.* 2010;2020(C):138–49.
- 4  
5 73. Sallis JF, Cerin E, Conway TL, Adams MA, Frank LD, Pratt M, et al. Physical activity in  
6  
7 relation to urban environments in 14 cities worldwide: A cross-sectional study. *Lancet.*  
8  
9 2016;387(10034):2207–17.
- 10  
11 74. Senatsverwaltung für Gesundheit Umwelt und Verbraucherschutz. Grundausswertung der  
12  
13 Einschulungsdaten in Berlin 2010. 2010.
- 14  
15 75. Merrill RM, Richardson JS. Validity of Self-Reported Height, Weight, and Body Mass Index:  
16  
17 Findings from the National Health and Nutrition Examination Survey, 2001-2006. *Prev*  
18  
19 *Chronic Dis.* 2009;6(4):A121.
- 20  
21 76. Slootmaker SM, Schuit AJ, Chinapaw MJ, Seidell JC, van Mechelen W. Disagreement in  
22  
23 physical activity assessed by accelerometer and self-report in subgroups of age, gender,  
24  
25 education and weight status. *Int J Behav Nutr Phys Act.* 2009;6(1):17.
- 26  
27 77. Hardy LL, Hills AP, Timperio A, Cliff D, Lubans D, Morgan PJ, et al. Journal of Science and  
28  
29 Medicine in Sport A hitchhiker's guide to assessing sedentary behaviour among young people:  
30  
31 Deciding what method to use. *J Sci Med Sport. Sports Medicine Australia;* 2013;16(1):28–35.
- 32  
33 78. Roberts C, Freeman J, Samdal O, Schnohr CW, de Looze ME, Nic Gabhainn S, et al. The  
34  
35 Health Behaviour in School-aged Children (HBSC) study: methodological developments and  
36  
37 current tensions. *Int J Public Health.* 2009 Sep;54 Suppl 2:140–50.
- 38  
39  
40  
41  
42  
43  
44  
45  
46  
47  
48  
49  
50  
51  
52  
53  
54  
55  
56  
57  
58  
59  
60

**Figures**

Figure 1. Flowchart of the recruitment process

Figure 2. Multivariable analysis of physical activity associated factors among 12 and 13 years old students (complete case analysis, n=1523)

Figure 3. Multivariable analysis of screen time associated factors among 12 and 13 years old students (complete case analysis, n=1523)

**Supplementary files**

Supplementary table 1. Multivariable analysis of physical activity associated factors among 12 and 13 years old students (complete case analysis, n=1523)

Supplementary table 2. Multivariable analysis of screen time associated factors among 12 and 13 years old students (complete case analysis, n=1523)

Supplementary table 3. Multivariable analysis of physical activity associated factors among 12 and 13 years old students (unequal sample sizes)

Supplementary table 4. Multivariable analysis of screen time associated factors among 12 and 13 years old students (unequal sample sizes)

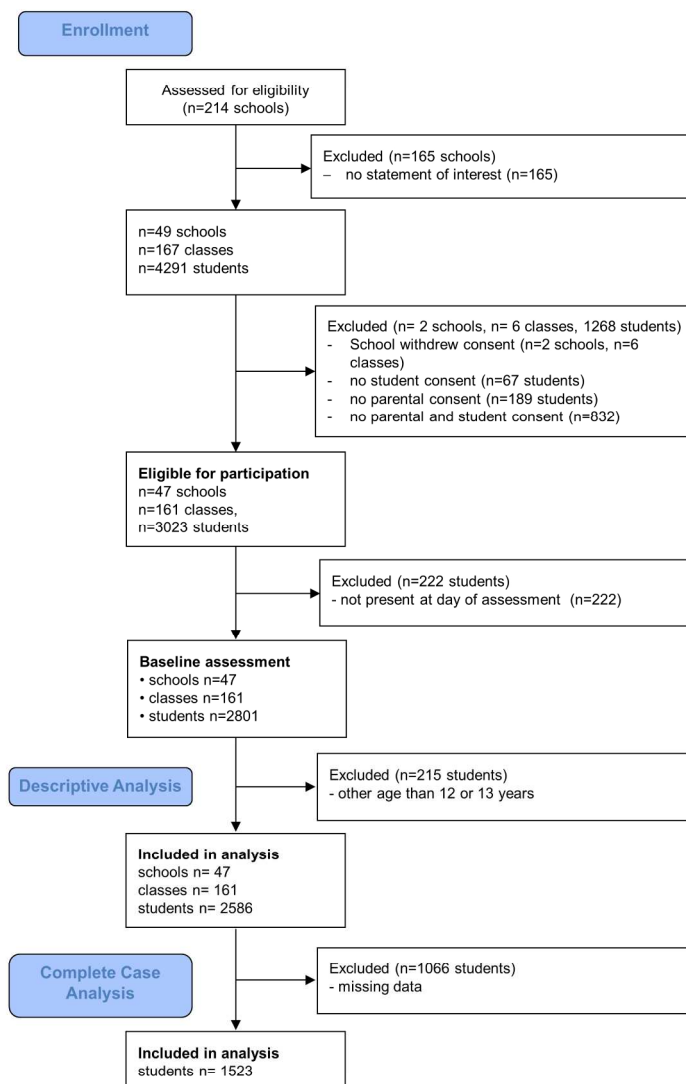

Flowchart of the recruitment process

254x338mm (300 x 300 DPI)



1  
2  
3  
4  
5  
6  
7  
8  
9  
10  
11  
12  
13  
14  
15  
16  
17  
18  
19  
20  
21  
22  
23  
24  
25  
26  
27  
28  
29  
30  
31  
32  
33  
34  
35  
36  
37  
38  
39  
40  
41  
42  
43  
44  
45  
46  
47  
48  
49  
50  
51  
52  
53  
54  
55  
56  
57  
58  
59  
60

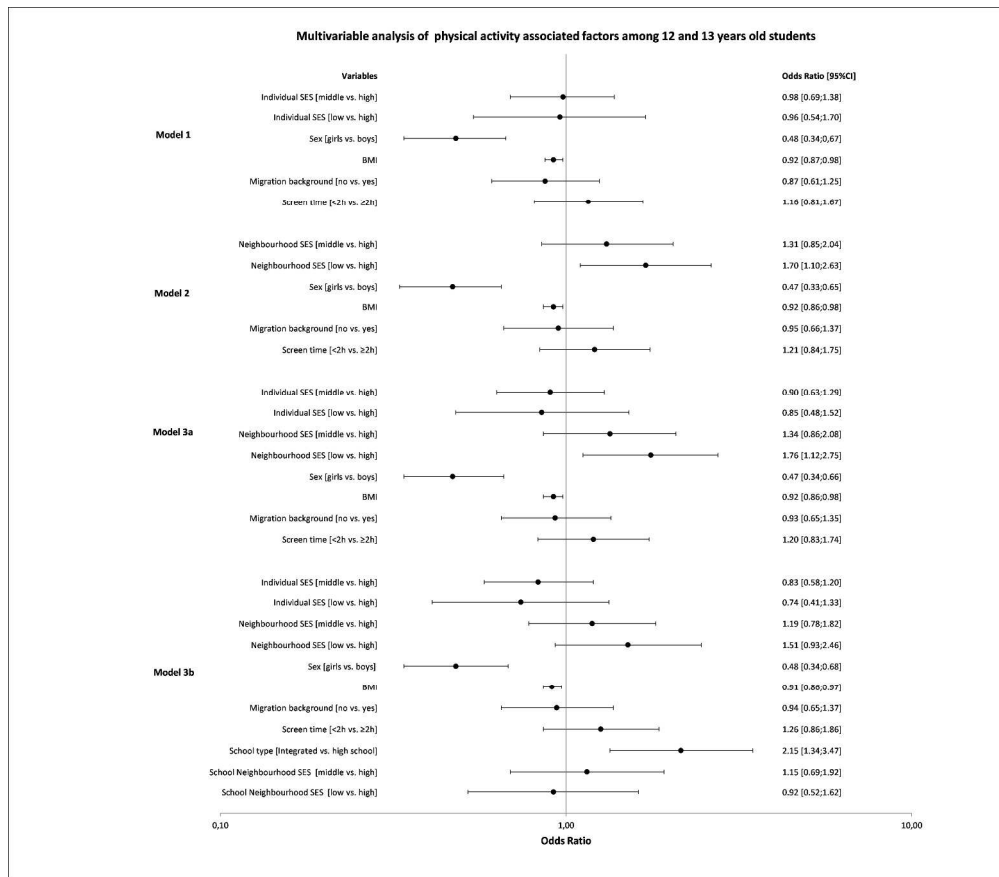

Multivariable analysis of physical activity associated factors among 12 and 13 years old students (complete case analysis, n=1523)

380x331mm (300 x 300 DPI)

only

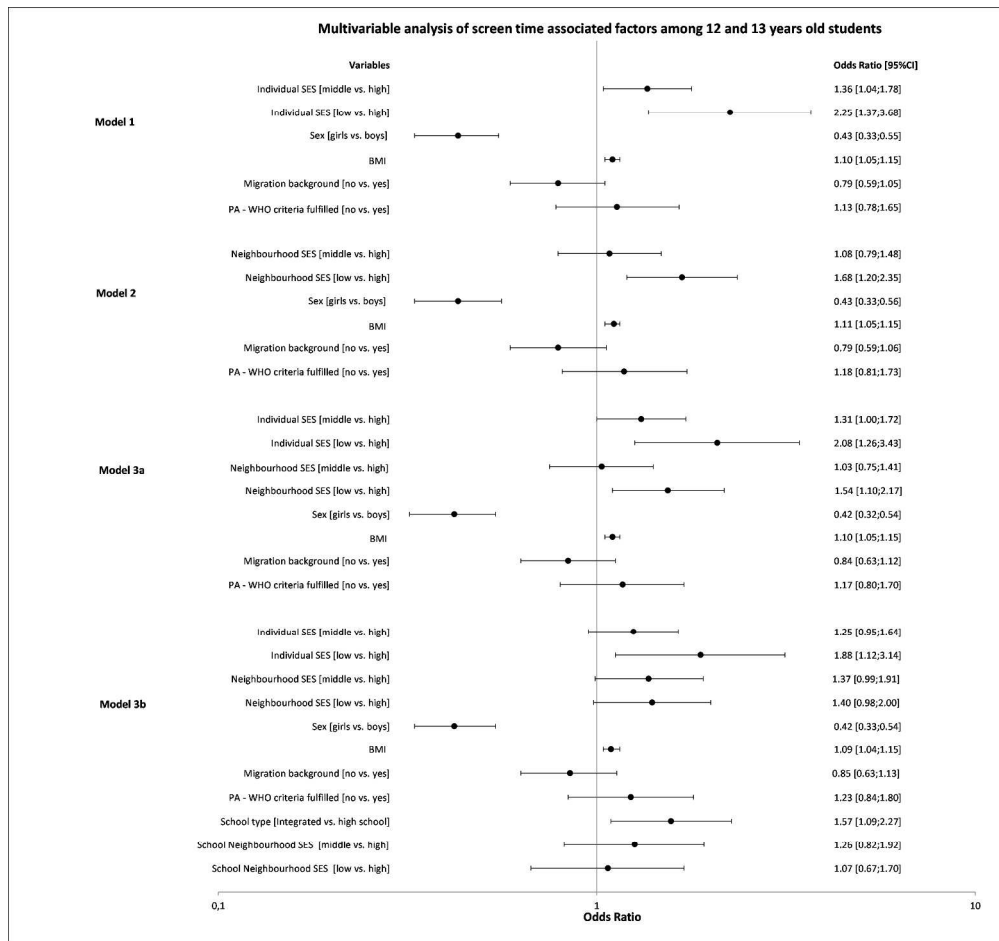

Multivariable analysis of screen time associated factors among 12 and 13 years old students (complete case analysis, n=1523)

333x312mm (300 x 300 DPI)

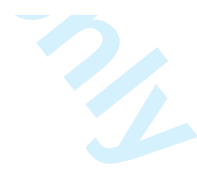

Supplementary table 1: Multivariable analysis of physical activity associated factors among 12 and 13 years old students

| WHO criteria for physical activity (at least 60 minutes per day physically active) fulfilled: |                   |                  |                   |                  |                   |                  |                   |                  |
|-----------------------------------------------------------------------------------------------|-------------------|------------------|-------------------|------------------|-------------------|------------------|-------------------|------------------|
|                                                                                               | Model 1*          |                  | Model 2**         |                  | Model 3***        |                  |                   |                  |
|                                                                                               |                   |                  |                   |                  | Model 3a          |                  | Model 3b          |                  |
|                                                                                               | OR (95% CI)       | p-value          |
| <b>Individual socioeconomic status (FAS)</b>                                                  |                   | 0.984            | -                 | -                |                   | 0.792            |                   | 0.476            |
| High                                                                                          | 1                 |                  | -                 | -                | 1                 |                  | 1                 |                  |
| Middle                                                                                        | 0.98 (0.69; 1.38) |                  | -                 | -                | 0.90 (0.63; 1.29) |                  | 0.83 (0.58; 1.20) |                  |
| Low                                                                                           | 0.96 (0.54; 1.70) |                  | -                 | -                | 0.85 (0.48; 1.52) |                  | 0.74 (0.41; 1.33) |                  |
| <b>Students' neighbourhood SES</b>                                                            | -                 | -                | -                 | <b>0.058</b>     |                   | <b>0.047</b>     |                   | 0.253            |
| High (rank 1-2)                                                                               | -                 | -                | 1                 |                  | 1                 |                  | 1                 |                  |
| Middle (rank 3-4)                                                                             | -                 | -                | 1.31 (0.85; 2.04) |                  | 1.34 (0.86; 2.08) |                  | 1.19 (0.78; 1.82) |                  |
| Low (rank 5-7)                                                                                | -                 | -                | 1.70 (1.10; 2.63) |                  | 1.76 (1.12; 2.75) |                  | 1.51 (0.93; 2.46) |                  |
| <b>Sex</b>                                                                                    |                   | <b>&lt;0.001</b> |                   | <b>&lt;0.001</b> |                   | <b>&lt;0.001</b> |                   | <b>&lt;0.001</b> |
| Boys                                                                                          | 1                 |                  | 1                 |                  | 1                 |                  | 1                 |                  |
| Girls                                                                                         | 0.48 (0.34; 0.67) |                  | 0.47 (0.33; 0.65) |                  | 0.47 (0.34; 0.66) |                  | 0.48 (0.34; 0.68) |                  |
| <b>BMI</b>                                                                                    | 0.92 (0.87; 0.98) | <b>0.007</b>     | 0.92 (0.86; 0.98) | <b>0.005</b>     | 0.92 (0.86; 0.98) | <b>0.006</b>     | 0.91 (0.86; 0.97) | <b>0.003</b>     |
| <b>Migration background</b>                                                                   |                   | 0.457            |                   | 0.786            |                   | 0.716            |                   | 0.761            |
| yes                                                                                           | 1                 |                  | 1                 |                  | 1                 |                  | 1                 |                  |
| no                                                                                            | 0.87 (0.61; 1.25) |                  | 0.95 (0.66; 1.37) |                  | 0.93 (0.65; 1.35) |                  | 0.94 (0.65; 1.37) |                  |
| <b>Screen time</b>                                                                            |                   | 0.429            |                   | 0.311            | -                 | 0.334            |                   | 0.233            |
| ≥2 hours                                                                                      | 1                 |                  | 1                 |                  | 1                 |                  | 1                 |                  |
| <2 hours                                                                                      | 1.16 (0.81; 1.67) |                  | 1.21 (0.84; 1.75) |                  | 1.20 (0.83; 1.74) |                  | 1.26 (0.86; 1.86) |                  |
| <b>School type</b>                                                                            | -                 | -                | -                 | -                | -                 | -                | -                 | <b>0.002</b>     |
| High School                                                                                   | -                 | -                | -                 | -                | -                 | -                | 1                 |                  |
| Integrated Secondary School                                                                   | -                 | -                | -                 | -                | -                 | -                | 2.15 (1.34; 3.47) |                  |
| <b>School neighbourhood SES</b>                                                               | -                 | -                | -                 | -                | -                 | -                |                   | 0.723            |
| High (rank 1-2)                                                                               | -                 | -                | -                 | -                | -                 | -                | 1                 |                  |
| Middle (rank 3-4)                                                                             | -                 | -                | -                 | -                | -                 | -                | 1.15 (0.69; 1.92) |                  |
| Low (rank 5-7)                                                                                | -                 | -                | -                 | -                | -                 | -                | 0.92 (0.52; 1.62) |                  |

Complete case analysis (n=1523)

\***Model 1:** individual socioeconomic status (FAS) adjusted for Sex, BMI, migration background, screen time

\*\***Model 2:** students' neighbourhood SES (3 categories) adjusted for Sex, BMI, migration background, screen time

\*\*\***Model 3 (Model 3a: Model 1+2, Model 3b: Model 1+2+school type+school neighbourhood SES)**

Supplementary table 2: Multivariable analysis of screen time associated factors among 12 and 13 years old students

|                                                        | High screen time (>2 hours per day) |                  |                  |                  |                   |                  |                   |                  |
|--------------------------------------------------------|-------------------------------------|------------------|------------------|------------------|-------------------|------------------|-------------------|------------------|
|                                                        | Model 1*                            |                  | Model 2**        |                  | Model 3***        |                  |                   |                  |
|                                                        |                                     |                  |                  |                  | Model 3a          |                  | Model 3b          |                  |
|                                                        | OR (95% CI)                         | p-value          | OR (95% CI)      | p-value          | OR (95% CI)       | p-value          | OR (95% CI)       | p-value          |
| <b>Individual SES (FAS)</b>                            |                                     | <b>0.002</b>     | -                | -                |                   | <b>0.008</b>     |                   | <b>0.036</b>     |
| High                                                   | 1                                   |                  | -                | -                | 1                 |                  | 1                 |                  |
| Middle                                                 | 1.36 (1.04; 1.78)                   |                  | -                | -                | 1.31 (1.00; 1.72) |                  | 1.25 (0.95; 1.64) |                  |
| Low                                                    | 2.25 (1.37; 3.68)                   |                  | -                | -                | 2.08 (1.26; 3.43) |                  | 1.88 (1.12; 3.14) |                  |
| <b>Students' neighbourhood SES</b>                     | -                                   | -                |                  | <b>0.005</b>     |                   | <b>0.019</b>     |                   | 0.109            |
| High (rank 1-2)                                        | -                                   | -                | 1                |                  | 1                 |                  | <b>1</b>          |                  |
| Middle (rank 3-4)                                      | -                                   | -                | 1.08 (0.79;1.48) |                  | 1.03 (0.75; 1.41) |                  | 1.37 (0.99; 1.91) |                  |
| Low (rank 5-7)                                         | -                                   | -                | 1.68 (1.20;2.35) |                  | 1.54 (1.10; 2.17) |                  | 1.40 (0.98; 2.00) |                  |
| <b>Sex</b>                                             |                                     | <b>&lt;0.001</b> |                  |                  |                   | <b>&lt;0.001</b> |                   | <b>&lt;0.001</b> |
| Boys                                                   | 1                                   |                  | 1                | <b>&lt;0.001</b> | 1                 |                  | 1                 |                  |
| Girls                                                  | 0.43 (0.33; 0.55)                   |                  | 0.43 (0.33;0.56) |                  | 0.42 (0.32; 0.54) |                  | 0.42 (0.33; 0.54) |                  |
| <b>BMI</b>                                             | 1.10 (1.05; 1.15)                   | <b>&lt;0.001</b> | 1.11 (1.05;1.15) | <b>&lt;0.001</b> | 1.10 (1.05; 1.15) | <b>&lt;0.001</b> | 1.09 (1.04; 1.15) | <b>&lt;0.001</b> |
| <b>Migration background</b>                            |                                     | <b>0.102</b>     |                  | 0.117            |                   | 0.238            |                   | 0.262            |
| yes                                                    | 1                                   |                  | 1                |                  | 1                 |                  | 1                 |                  |
| no                                                     | 0.79 (0.59; 1.05)                   |                  | 0.79 (0.59;1.06) |                  | 0.84 (0.63; 1.12) |                  | 0.85 (0.63; 1.13) |                  |
| <b>Physical activity (PA) (WHO criteria fulfilled)</b> |                                     | 0.523            |                  | 0.389            |                   | 0.430            |                   | 0.297            |
| Yes                                                    | 1                                   |                  | 1                |                  | 1                 |                  | 1                 |                  |
| No                                                     | 1.13 (0.78; 1.65)                   |                  | 1.18 (0.81;1.73) |                  | 1.17 (0.80; 1.70) |                  | 1.23 (0.84; 1.80) |                  |
| <b>School type</b>                                     |                                     |                  | -                | -                | -                 | -                |                   | <b>0.016</b>     |
| High School                                            |                                     |                  | -                | -                | -                 | -                | <b>1</b>          |                  |
| Integrated Secondary School                            |                                     |                  | -                | -                | -                 | -                | 1.57 (1.09; 2.27) |                  |
| <b>School neighbourhood SES</b>                        |                                     |                  | -                | -                | -                 | -                |                   | 0.535            |
| High (rank 1-2)                                        |                                     |                  | -                | -                | -                 | -                | <b>1</b>          |                  |
| Middle (rank 3-4)                                      |                                     |                  | -                | -                | -                 | -                | 1.26 (0.82; 1.92) |                  |
| Low (rank 5-7)                                         |                                     |                  | -                | -                | -                 | -                | 1.07 (0.67; 1.70) |                  |

Complete case analysis (n=1523)

\***Model 1:** individual socioeconomic status (FAS) adjusted for Sex, BMI, migration background, PA

\*\***Model 2:** students' neighbourhood SES (3 categories) adjusted for Sex, BMI, migration background, PA

\*\*\***Model 3 (Model 3a: Model 1+2, Model 3b: Model 1+2+ school type + school neighbourhood SES)**

Supplementary table 3: Multivariable analysis of physical activity associated factors among 12 and 13 years old students

| WHO criteria for physical activity (at least 60 minutes per day physically active) fulfilled: |                   |                  |                  |                  |                   |                  |                   |                  |
|-----------------------------------------------------------------------------------------------|-------------------|------------------|------------------|------------------|-------------------|------------------|-------------------|------------------|
|                                                                                               | Model 1*          |                  | Model 2**        |                  | Model 3***        |                  |                   |                  |
|                                                                                               | (n=1760)          |                  | (n=1818)         |                  | Model 3a (n=1547) |                  | Model 3b (n=1523) |                  |
|                                                                                               | OR (95% CI)       | p-value          | OR (95% CI)      | p-value          | OR (95% CI)       | p-value          | OR (95% CI)       | p-value          |
| <b>Individual socioeconomic status (FAS)</b>                                                  |                   | 0.940            | -                | -                |                   | 0.763            |                   | 0.476            |
| High                                                                                          | 1                 |                  | -                | -                | 1                 |                  | 1                 |                  |
| Middle                                                                                        | 0.95 (0.69; 1.31) |                  | -                | -                | 0.89 (0.62; 1.26) |                  | 0.83 (0.58; 1.20) |                  |
| Low                                                                                           | 1.01 (0.60; 1.69) |                  | -                | -                | 0.87 (0.50; 1.54) |                  | 0.74 (0.41; 1.33) |                  |
| <b>Students' neighbourhood SES</b>                                                            | -                 | -                | -                | <b>0.028</b>     |                   | 0.079            |                   | 0.253            |
| High (rank 1-2)                                                                               | -                 | -                | 1                |                  | 1                 |                  | 1                 |                  |
| Middle (rank 3-4)                                                                             | -                 | -                | 1.24 (0.84;1.84) |                  | 1.27 (0.85; 1.88) |                  | 1.19 (0.78; 1.82) |                  |
| Low (rank 5-7)                                                                                | -                 | -                | 1.67 (1.14;2.44) |                  | 1.65 (1.07; 2.56) |                  | 1.51 (0.93; 2.46) |                  |
| <b>Sex</b>                                                                                    |                   | <b>&lt;0.001</b> |                  | <b>&lt;0.001</b> |                   | <b>&lt;0.001</b> |                   | <b>&lt;0.001</b> |
| Boys                                                                                          | 1                 |                  | 1                |                  | 1                 |                  | 1                 |                  |
| Girls                                                                                         | 0.51 (0.38; 0.69) |                  | 0.48 (0.36;0.65) |                  | 0.48 (0.35; 0.67) |                  | 0.48 (0.34; 0.68) |                  |
| <b>BMI</b>                                                                                    | 0.90 (0.85; 0.95) | <b>&lt;0.001</b> | 0.92 (0.87;0.97) | <b>0.002</b>     | 0.92 (0.87; 0.98) | <b>0.006</b>     | 0.91 (0.86; 0.97) | <b>0.003</b>     |
| <b>Migration background</b>                                                                   |                   | 0.844            |                  | 0.957            |                   | 0.588            |                   | 0.761            |
| yes                                                                                           | 1                 |                  | 1                |                  | 1                 |                  | 1                 |                  |
| no                                                                                            | 0.97 (0.69; 1.36) |                  | 0.99 (0.72;1.36) |                  | 0.91 (0.63; 1.30) |                  | 0.94 (0.65; 1.37) |                  |
| <b>Screen time</b>                                                                            |                   | 0.734            |                  | 0.165            | -                 | 0.425            |                   | 0.233            |
| ≥2 hours                                                                                      | 1                 |                  | 1                |                  | 1                 |                  | 1                 |                  |
| <2 hours                                                                                      | 1.06 (0.76; 1.49) |                  | 1.26 (0.91;1.74) |                  | 1.16 (0.81; 1.67) |                  | 1.26 (0.86; 1.86) |                  |
| <b>School type</b>                                                                            | -                 | -                | -                | -                | -                 | -                | -                 | <b>0.002</b>     |
| High School                                                                                   | -                 | -                | -                | -                | -                 | -                | 1                 |                  |
| Integrated Secondary School                                                                   | -                 | -                | -                | -                | -                 | -                | 2.15 (1.34; 3.47) |                  |
| <b>School neighbourhood SES</b>                                                               | -                 | -                | -                | -                | -                 | -                |                   | 0.723            |
| High (rank 1-2)                                                                               | -                 | -                | -                | -                | -                 | -                | 1                 |                  |
| Middle (rank 3-4)                                                                             | -                 | -                | -                | -                | -                 | -                | 1.15 (0.69; 1.92) |                  |
| Low (rank 5-7)                                                                                | -                 | -                | -                | -                | -                 | -                | 0.92 (0.52; 1.62) |                  |

\***Model 1:** individual socioeconomic status (FAS) adjusted for Sex, BMI, migration background, screen time

\*\***Model 2:** students' neighbourhood SES (3 categories) adjusted for Sex, BMI, migration background, screen time

\*\*\***Model 3 (Model 3a: Model 1+2, Model 3b: Model 1+2+ school type + school neighbourhood SES)**

Supplementary table 4: Multivariable analysis of screen time associated factors among 12 and 13 years old students

|                                                        | High screen time (>2 hours per day) |                  |                  |                  |                   |                  |                   |                  |
|--------------------------------------------------------|-------------------------------------|------------------|------------------|------------------|-------------------|------------------|-------------------|------------------|
|                                                        | Model 1*                            |                  | Model 2**        |                  | Model 3***        |                  |                   |                  |
|                                                        | (n=1760)                            |                  | (n=1818)         |                  | Model 3a (n=1547) |                  | Model 3b (n=1523) |                  |
|                                                        | OR (95% CI)                         | p-value          | OR (95% CI)      | p-value          | OR (95% CI)       | p-value          | OR (95% CI)       | p-value          |
| <b>Individual SES (FAS)</b>                            |                                     | <b>0.004</b>     | -                | -                |                   | <b>0.007</b>     |                   | <b>0.036</b>     |
| High                                                   | 1                                   |                  | -                | -                | 1                 |                  | 1                 |                  |
| Middle                                                 | 1.28 (1.00; 1.64)                   |                  | -                | -                | 1.32 (1.01; 1.73) |                  | 1.25 (0.95; 1.64) |                  |
| Low                                                    | 2.03 (1.30; 3.15)                   |                  | -                | -                | 2.09 (1.27; 3.45) |                  | 1.88 (1.12; 3.14) |                  |
| <b>Students' neighbourhood SES</b>                     | -                                   | -                |                  | <b>0.002</b>     |                   | <b>0.019</b>     |                   | 0.109            |
| High (rank 1-2)                                        | -                                   | -                | 1                |                  | 1                 |                  | <b>1</b>          |                  |
| Middle (rank 3-4)                                      | -                                   | -                | 1.07 (0.80;1.44) |                  | 1.49 (1.08; 2.05) |                  | 1.37 (0.99; 1.91) |                  |
| Low (rank 5-7)                                         | -                                   | -                | 1.68 (1.22;2.29) |                  | 1.55 (1.10; 2.17) |                  | 1.40 (0.98; 2.00) |                  |
| <b>Sex</b>                                             |                                     | <b>&lt;0.001</b> |                  |                  |                   | <b>&lt;0.001</b> |                   | <b>&lt;0.001</b> |
| Boys                                                   | 1                                   |                  | 1                | <b>&lt;0.001</b> | 1                 |                  | 1                 |                  |
| Girls                                                  | 0.46 (0.37; 0.59)                   |                  | 0.45 (0.35;0.56) |                  | 0.42 (0.32; 0.54) |                  | 0.42 (0.33; 0.54) |                  |
| <b>BMI</b>                                             | 1.09 (1.05; 1.14)                   | <b>&lt;0.001</b> | 1.08 (1.04;1.13) | <b>&lt;0.001</b> | 1.09 (1.04; 1.14) | <b>&lt;0.001</b> | 1.09 (1.04; 1.15) | <b>&lt;0.001</b> |
| <b>Migration background</b>                            |                                     | <b>0.035</b>     |                  | 0.223            |                   | 0.267            |                   | 0.262            |
| yes                                                    | 1                                   |                  | 1                |                  | 1                 |                  | 1                 |                  |
| no                                                     | 0.75 (0.57; 0.98)                   |                  | 0.85 (0.65;1.11) |                  | 0.85 (0.63; 1.14) |                  | 0.85 (0.63; 1.13) |                  |
| <b>Physical activity (PA) (WHO criteria fulfilled)</b> |                                     | 0.738            |                  | 0.189            |                   | 0.510            |                   | 0.297            |
| Yes                                                    | 1                                   |                  | 1                |                  | 1                 |                  | 1                 |                  |
| No                                                     | 1.06 (0.75; 1.50)                   |                  | 1.25 (0.90;1.74) |                  | 1.14 (0.78; 1.66) |                  | 1.23 (0.84; 1.80) |                  |
| <b>School type</b>                                     |                                     |                  | -                | -                | -                 | -                |                   | <b>0.016</b>     |
| High School                                            |                                     |                  | -                | -                | -                 | -                | <b>1</b>          |                  |
| Integrated Secondary School                            |                                     |                  | -                | -                | -                 | -                | 1.57 (1.09; 2.27) |                  |
| <b>School neighbourhood SES</b>                        |                                     |                  | -                | -                | -                 | -                |                   | 0.535            |
| High (rank 1-2)                                        |                                     |                  | -                | -                | -                 | -                | <b>1</b>          |                  |
| Middle (rank 3-4)                                      |                                     |                  | -                | -                | -                 | -                | 1.26 (0.82; 1.92) |                  |
| Low (rank 5-7)                                         |                                     |                  | -                | -                | -                 | -                | 1.07 (0.67; 1.70) |                  |

\*Model 1: individual socioeconomic status (FAS) adjusted for Sex, BMI, migration background, PA

\*\*Model 2: students' neighbourhood SES (3 categories) adjusted for Sex, BMI, migration background, PA

\*\*\*Model 3 (Model 3a: Model 1+2, Model 3b: Model 1+2+ school type + school neighbourhood SES)

## STROBE (Strengthening The Reporting of OBServational Studies in Epidemiology) Checklist

A checklist of items that should be included in reports of observational studies. You must report the page number in your manuscript where you consider each of the items listed in this checklist. If you have not included this information, either revise your manuscript accordingly before submitting or note N/A.

**Note:** An Explanation and Elaboration article discusses each checklist item and gives methodological background and published examples of transparent reporting. The STROBE checklist is best used in conjunction with this article (freely available on the Web sites of PLoS Medicine at <http://www.plosmedicine.org/>, Annals of Internal Medicine at <http://www.annals.org/>, and Epidemiology at <http://www.epidem.com/>). Information on the STROBE Initiative is available at [www.strobe-statement.org](http://www.strobe-statement.org).

| Section and Item     | Item No. | Recommendation                                                                                                                                                                                                                                                                                                                                                                                                                                                                 | Reported on Page No. |
|----------------------|----------|--------------------------------------------------------------------------------------------------------------------------------------------------------------------------------------------------------------------------------------------------------------------------------------------------------------------------------------------------------------------------------------------------------------------------------------------------------------------------------|----------------------|
| Title and Abstract   | 1        | (a) Indicate the study's design with a commonly used term in the title or the abstract                                                                                                                                                                                                                                                                                                                                                                                         |                      |
|                      |          | (b) Provide in the abstract an informative and balanced summary of what was done and what was found                                                                                                                                                                                                                                                                                                                                                                            |                      |
| <b>Introduction</b>  |          |                                                                                                                                                                                                                                                                                                                                                                                                                                                                                |                      |
| Background/Rationale | 2        | Explain the scientific background and rationale for the investigation being reported                                                                                                                                                                                                                                                                                                                                                                                           |                      |
| Objectives           | 3        | State specific objectives, including any prespecified hypotheses                                                                                                                                                                                                                                                                                                                                                                                                               |                      |
| <b>Methods</b>       |          |                                                                                                                                                                                                                                                                                                                                                                                                                                                                                |                      |
| Study Design         | 4        | Present key elements of study design early in the paper                                                                                                                                                                                                                                                                                                                                                                                                                        |                      |
| Setting              | 5        | Describe the setting, locations, and relevant dates, including periods of recruitment, exposure, follow-up, and data collection                                                                                                                                                                                                                                                                                                                                                |                      |
| Participants         | 6        | (a) <i>Cohort study</i> —Give the eligibility criteria, and the sources and methods of selection of participants. Describe methods of follow-up<br><br><i>Case-control study</i> —Give the eligibility criteria, and the sources and methods of case ascertainment and control selection. Give the rationale for the choice of cases and controls<br><br><i>Cross-sectional study</i> —Give the eligibility criteria, and the sources and methods of selection of participants |                      |
|                      |          | (b) <i>Cohort study</i> —For matched studies, give matching criteria and number of exposed and unexposed<br><br><i>Case-control study</i> —For matched studies, give matching criteria and the number of controls per case                                                                                                                                                                                                                                                     |                      |
| Variables            | 7        | Clearly define all outcomes, exposures, predictors, potential confounders, and effect modifiers. Give diagnostic criteria, if applicable                                                                                                                                                                                                                                                                                                                                       |                      |

| Section and Item             | Item No. | Recommendation                                                                                                                                                                                                                                                                                            | Reported on Page No. |
|------------------------------|----------|-----------------------------------------------------------------------------------------------------------------------------------------------------------------------------------------------------------------------------------------------------------------------------------------------------------|----------------------|
| Data Sources/<br>Measurement | 8*       | For each variable of interest, give sources of data and details of methods of assessment (measurement). Describe comparability of assessment methods if there is more than one group                                                                                                                      |                      |
| Bias                         | 9        | Describe any efforts to address potential sources of bias                                                                                                                                                                                                                                                 |                      |
| Study Size                   | 10       | Explain how the study size was arrived at                                                                                                                                                                                                                                                                 |                      |
| Quantitative Variables       | 11       | Explain how quantitative variables were handled in the analyses. If applicable, describe which groupings were chosen and why                                                                                                                                                                              |                      |
| Statistical Methods          | 12       | (a) Describe all statistical methods, including those used to control for confounding                                                                                                                                                                                                                     |                      |
|                              |          | (b) Describe any methods used to examine subgroups and interactions                                                                                                                                                                                                                                       |                      |
|                              |          | (c) Explain how missing data were addressed                                                                                                                                                                                                                                                               |                      |
|                              |          | (d) <i>Cohort study</i> —If applicable, explain how loss to follow-up was addressed<br><i>Case-control study</i> —If applicable, explain how matching of cases and controls was addressed<br><i>Cross-sectional study</i> —If applicable, describe analytical methods taking account of sampling strategy |                      |
|                              |          | (e) Describe any sensitivity analyses                                                                                                                                                                                                                                                                     |                      |
| <b>Results</b>               |          |                                                                                                                                                                                                                                                                                                           |                      |
| Participants                 | 13*      | (a) Report numbers of individuals at each stage of study—eg numbers potentially eligible, examined for eligibility, confirmed eligible, included in the study, completing follow-up, and analysed                                                                                                         |                      |
|                              |          | (b) Give reasons for non-participation at each stage                                                                                                                                                                                                                                                      |                      |
|                              |          | (c) Consider use of a flow diagram                                                                                                                                                                                                                                                                        |                      |
| Descriptive Data             | 14*      | (a) Give characteristics of study participants (eg demographic, clinical, social) and information on exposures and potential confounders                                                                                                                                                                  |                      |
|                              |          | (b) Indicate number of participants with missing data for each variable of interest                                                                                                                                                                                                                       |                      |
|                              |          | (c) <i>Cohort study</i> —Summarise follow-up time (eg, average and total amount)                                                                                                                                                                                                                          |                      |
| Outcome Data                 | 15*      | <i>Cohort study</i> —Report numbers of outcome events or summary measures over time                                                                                                                                                                                                                       |                      |
|                              |          | <i>Case-control study</i> —Report numbers in each exposure category, or summary measures of exposure                                                                                                                                                                                                      |                      |
|                              |          | <i>Cross-sectional study</i> —Report numbers of outcome events or summary measures                                                                                                                                                                                                                        |                      |



| Section and Item         | Item No. | Recommendation                                                                                                                                                                                               | Reported on Page No. |
|--------------------------|----------|--------------------------------------------------------------------------------------------------------------------------------------------------------------------------------------------------------------|----------------------|
| Main Results             | 16       | (a) Give unadjusted estimates and, if applicable, confounder-adjusted estimates and their precision (eg, 95% confidence interval). Make clear which confounders were adjusted for and why they were included |                      |
|                          |          | (b) Report category boundaries when continuous variables were categorized                                                                                                                                    |                      |
|                          |          | (c) If relevant, consider translating estimates of relative risk into absolute risk for a meaningful time period                                                                                             |                      |
| Other Analyses           | 17       | Report other analyses done—eg analyses of subgroups and interactions, and sensitivity analyses                                                                                                               |                      |
| <b>Discussion</b>        |          |                                                                                                                                                                                                              |                      |
| Key Results              | 18       | Summarise key results with reference to study objectives                                                                                                                                                     |                      |
| Limitations              | 19       | Discuss limitations of the study, taking into account sources of potential bias or imprecision. Discuss both direction and magnitude of any potential bias                                                   |                      |
| Interpretation           | 20       | Give a cautious overall interpretation of results considering objectives, limitations, multiplicity of analyses, results from similar studies, and other relevant evidence                                   |                      |
| Generalisability         | 21       | Discuss the generalisability (external validity) of the study results                                                                                                                                        |                      |
| <b>Other Information</b> |          |                                                                                                                                                                                                              |                      |
| Funding                  | 22       | Give the source of funding and the role of the funders for the present study and, if applicable, for the original study on which the present article is based                                                |                      |

\*Give information separately for cases and controls in case-control studies and, if applicable, for exposed and unexposed groups in cohort and cross-sectional studies.

**Once you have completed this checklist, please save a copy and upload it as part of your submission. DO NOT include this checklist as part of the main manuscript document. It must be uploaded as a separate file.**
