# Supplementary material for: Association of individual and neighbourhood socioeconomic status with physical activity and screen time in seventh-grade boys and girls in Berlin, Germany: a cross-sectional study
Source: PubMed Central journal article supplement — BMJ Open. 2017 Dec 28;7(12):e017974. doi: 10.1136/bmjopen-2017-017974 (PMC5770905; doi:10.1136/bmjopen-2017-017974), 2017-12-28
Supplement: bmjopen-2017-017974supp001.pdf [file bmjopen-2017-017974supp001.pdf]

**Supplementary table 1: Multivariable analysis of physical activity associated factors among 12 and 13 years old students**

| WHO criteria for physical activity (at least 60 minutes per day physically active) fulfilled: |                   |                  |                  |                  |                   |                  |                   |                  |
|-----------------------------------------------------------------------------------------------|-------------------|------------------|------------------|------------------|-------------------|------------------|-------------------|------------------|
|                                                                                               | Model 1*          |                  | Model 2**        |                  | Model 3***        |                  |                   |                  |
|                                                                                               |                   |                  |                  |                  | Model 3a          |                  | Model 3b          |                  |
|                                                                                               | OR (95% CI)       | p-value          | OR (95% CI)      | p-value          | OR (95% CI)       | p-value          | OR (95% CI)       | p-value          |
| <b>Individual socioeconomic status (FAS)</b>                                                  |                   | 0.984            | -                | -                |                   | 0.792            |                   | 0.476            |
| High                                                                                          | 1                 |                  | -                | -                | 1                 |                  | 1                 |                  |
| Middle                                                                                        | 0.98 (0.69; 1.38) |                  | -                | -                | 0.90 (0.63;1.29)  |                  | 0.83 (0.58; 1.20) |                  |
| Low                                                                                           | 0.96 (0.54; 1.70) |                  | -                | -                | 0.85 (0.48; 1.52) |                  | 0.74 (0.41; 1.33) |                  |
| <b>Students' neighbourhood SES</b>                                                            | -                 | -                | -                | <b>0.058</b>     |                   | <b>0.047</b>     |                   | 0.253            |
| High (rank 1-2)                                                                               | -                 | -                | 1                |                  | 1                 |                  | 1                 |                  |
| Middle (rank 3-4)                                                                             | -                 | -                | 1.31 (0.85;2.04) |                  | 1.34 (0.86; 2.08) |                  | 1.19 (0.78; 1.82) |                  |
| Low (rank 5-7)                                                                                | -                 | -                | 1.70 (1.10;2.63) |                  | 1.76 (1.12; 2.75) |                  | 1.51 (0.93; 2.46) |                  |
| <b>Sex</b>                                                                                    |                   | <b>&lt;0.001</b> |                  | <b>&lt;0.001</b> |                   | <b>&lt;0.001</b> |                   | <b>&lt;0.001</b> |
| Boys                                                                                          | 1                 |                  | 1                |                  | 1                 |                  | 1                 |                  |
| Girls                                                                                         | 0.48 (0.34; 0.67) |                  | 0.47 (0.33;0.65) |                  | 0.47 (0.34; 0.66) |                  | 0.48 (0.34; 0.68) |                  |
| <b>BMI</b>                                                                                    | 0.92 (0.87; 0.98) | <b>0.007</b>     | 0.92 (0.86;0.98) | <b>0.005</b>     | 0.92 (0.86; 0.98) | <b>0.006</b>     | 0.91 (0.86; 0.97) | <b>0.003</b>     |
| <b>Migration background</b>                                                                   |                   | 0.457            |                  | 0.786            |                   | 0.716            |                   | 0.761            |
| yes                                                                                           | 1                 |                  | 1                |                  | 1                 |                  | 1                 |                  |
| no                                                                                            | 0.87 (0.61; 1.25) |                  | 0.95 (0.66;1.37) |                  | 0.93 (0.65; 1.35) |                  | 0.94 (0.65; 1.37) |                  |
| <b>Screen time</b>                                                                            |                   | 0.429            |                  | 0.311            | -                 | 0.334            |                   | 0.233            |
| ≥2 hours                                                                                      | 1                 |                  | 1                |                  | 1                 |                  | 1                 |                  |
| <2 hours                                                                                      | 1.16 (0.81; 1.67) |                  | 1.21 (0.84;1.75) |                  | 1.20 (0.83; 1.74) |                  | 1.26 (0.86; 1.86) |                  |
| <b>School type</b>                                                                            | -                 | -                | -                | -                | -                 |                  |                   | <b>0.002</b>     |
| High School                                                                                   | -                 | -                | -                | -                | -                 |                  | 1                 |                  |
| Integrated Secondary School                                                                   | -                 | -                | -                | -                | -                 |                  | 2.15 (1.34; 3.47) |                  |
| <b>School neighbourhood SES</b>                                                               | -                 | -                | -                | -                | -                 |                  |                   | 0.723            |
| High (rank 1-2)                                                                               | -                 | -                | -                | -                | -                 |                  | 1                 |                  |
| Middle (rank 3-4)                                                                             | -                 | -                | -                | -                | -                 |                  | 1.15 (0.69; 1.92) |                  |
| Low (rank 5-7)                                                                                | -                 | -                | -                | -                | -                 |                  | 0.92 (0.52; 1.62) |                  |

Complete case analysis (n=1523)

\***Model 1:** individual socioeconomic status (FAS) adjusted for Sex, BMI, migration background, screen time

\*\***Model 2:** students' neighbourhood SES (3 categories) adjusted for Sex, BMI, migration background, screen time

\*\*\***Model 3 (Model 3a:** Model 1+2, **Model 3b:** Model 1+2+school type+school neighbourhood SES
