# Supplementary material for: Association of individual and neighbourhood socioeconomic status with physical activity and screen time in seventh-grade boys and girls in Berlin, Germany: a cross-sectional study
Source: PubMed Central journal article supplement — BMJ Open. 2017 Dec 28;7(12):e017974. doi: 10.1136/bmjopen-2017-017974 (PMC5770905; doi:10.1136/bmjopen-2017-017974), 2017-12-28
Supplement: bmjopen-2017-017974supp002.pdf [file bmjopen-2017-017974supp002.pdf]

**Supplementary table 2: Multivariable analysis of screen time associated factors among 12 and 13 years old students**

|                                                        | High screen time (>2 hours per day) |                  |                  |                  |                   |                  |                   |                  |
|--------------------------------------------------------|-------------------------------------|------------------|------------------|------------------|-------------------|------------------|-------------------|------------------|
|                                                        | Model 1*                            |                  | Model 2**        |                  | Model 3***        |                  |                   |                  |
|                                                        |                                     |                  |                  |                  | Model 3a          |                  | Model 3b          |                  |
|                                                        | OR (95% CI)                         | p-value          | OR (95% CI)      | p-value          | OR (95% CI)       | p-value          | OR (95% CI)       | p-value          |
| <b>Individual SES (FAS)</b>                            |                                     | <b>0.002</b>     | -                | -                |                   | <b>0.008</b>     |                   | <b>0.036</b>     |
| High                                                   | 1                                   |                  | -                | -                | 1                 |                  | 1                 |                  |
| Middle                                                 | 1.36 (1.04; 1.78)                   |                  | -                | -                | 1.31 (1.00; 1.72) |                  | 1.25 (0.95; 1.64) |                  |
| Low                                                    | 2.25 (1.37; 3.68)                   |                  | -                | -                | 2.08 (1.26; 3.43) |                  | 1.88 (1.12; 3.14) |                  |
| <b>Students' neighbourhood SES</b>                     | -                                   | -                |                  | <b>0.005</b>     |                   | <b>0.019</b>     |                   | 0.109            |
| High (rank 1-2)                                        | -                                   | -                | 1                |                  | 1                 |                  | <b>1</b>          |                  |
| Middle (rank 3-4)                                      | -                                   | -                | 1.08 (0.79;1.48) |                  | 1.03 (0.75; 1.41) |                  | 1.37 (0.99; 1.91) |                  |
| Low (rank 5-7)                                         | -                                   | -                | 1.68 (1.20;2.35) |                  | 1.54 (1.10; 2.17) |                  | 1.40 (0.98; 2.00) |                  |
| <b>Sex</b>                                             |                                     | <b>&lt;0.001</b> |                  |                  |                   | <b>&lt;0.001</b> |                   | <b>&lt;0.001</b> |
| Boys                                                   | 1                                   |                  | 1                | <b>&lt;0.001</b> | 1                 |                  | 1                 |                  |
| Girls                                                  | 0.43 (0.33; 0.55)                   |                  | 0.43 (0.33;0.56) |                  | 0.42 (0.32; 0.54) |                  | 0.42 (0.33; 0.54) |                  |
| <b>BMI</b>                                             | 1.10 (1.05; 1.15)                   | <b>&lt;0.001</b> | 1.11 (1.05;1.15) | <b>&lt;0.001</b> | 1.10 (1.05; 1.15) | <b>&lt;0.001</b> | 1.09 (1.04; 1.15) | <b>&lt;0.001</b> |
| <b>Migration background</b>                            |                                     | <b>0.102</b>     |                  | 0.117            |                   | 0.238            |                   | 0.262            |
| yes                                                    | 1                                   |                  | 1                |                  | 1                 |                  | 1                 |                  |
| no                                                     | 0.79 (0.59; 1.05)                   |                  | 0.79 (0.59;1.06) |                  | 0.84 (0.63; 1.12) |                  | 0.85 (0.63; 1.13) |                  |
| <b>Physical activity (PA) (WHO criteria fulfilled)</b> |                                     | 0.523            |                  | 0.389            |                   | 0.430            |                   | 0.297            |
| Yes                                                    | 1                                   |                  | 1                |                  | 1                 |                  | 1                 |                  |
| No                                                     | 1.13 (0.78; 1.65)                   |                  | 1.18 (0.81;1.73) |                  | 1.17 (0.80; 1.70) |                  | 1.23 (0.84; 1.80) |                  |
| <b>School type</b>                                     |                                     |                  | -                | -                | -                 | -                |                   | <b>0.016</b>     |
| High School                                            |                                     |                  | -                | -                | -                 | -                | <b>1</b>          |                  |
| Integrated Secondary School                            |                                     |                  | -                | -                | -                 | -                | 1.57 (1.09; 2.27) |                  |
| <b>School neighbourhood SES</b>                        |                                     |                  | -                | -                | -                 | -                |                   | 0.535            |
| High (rank 1-2)                                        |                                     |                  | -                | -                | -                 | -                | <b>1</b>          |                  |
| Middle (rank 3-4)                                      |                                     |                  | -                | -                | -                 | -                | 1.26 (0.82; 1.92) |                  |
| Low (rank 5-7)                                         |                                     |                  | -                | -                | -                 | -                | 1.07 (0.67; 1.70) |                  |

Complete case analysis (n=1523)

\***Model 1:** individual socioeconomic status (FAS) adjusted for Sex, BMI, migration background, PA

\*\***Model 2:** students' neighbourhood SES (3 categories) adjusted for Sex, BMI, migration background, PA

\*\*\***Model 3 (Model 3a: Model 1+2, Model 3b: Model 1+2+ school type + school neighbourhood SES)**
